# Supplementary material for: The prevalence and influencing factors of physical activity and sedentary behaviour in the rural population in China: the Henan Rural Cohort Study
Source: PubMed Central journal article supplement — BMJ Open. 2019 Sep 3;9(9):e029590. doi: 10.1136/bmjopen-2019-029590 (PMC6731809; doi:10.1136/bmjopen-2019-029590), 2019-09-03
Supplement: bmjopen-2019-029590.draft_revisions.pdf [file bmjopen-2019-029590.draft_revisions.pdf]

# BMJ Open

BMJ Open is committed to open peer review. As part of this commitment we make the peer review history of every article we publish publicly available.

When an article is published we post the peer reviewers' comments and the authors' responses online. We also post the versions of the paper that were used during peer review. These are the versions that the peer review comments apply to.

The versions of the paper that follow are the versions that were submitted during the peer review process. They are not the versions of record or the final published versions. They should not be cited or distributed as the published version of this manuscript.

BMJ Open is an open access journal and the full, final, typeset and author-corrected version of record of the manuscript is available on our site with no access controls, subscription charges or pay-per-view fees (<http://bmjopen.bmj.com>).

If you have any questions on BMJ Open's open peer review process please email [info.bmjopen@bmj.com](mailto:info.bmjopen@bmj.com)

# BMJ Open

## The prevalence and influence factors of physical activity and sedentary behavior in Chinese rural population: The Henan Rural Cohort Study

|                               |                                                                                                                                                                                                                                                                                                                                                                                                                                                                                                                                                                                                                                                                                                                                                                                                                                                                                                                                                                                                                                                                                                           |
|-------------------------------|-----------------------------------------------------------------------------------------------------------------------------------------------------------------------------------------------------------------------------------------------------------------------------------------------------------------------------------------------------------------------------------------------------------------------------------------------------------------------------------------------------------------------------------------------------------------------------------------------------------------------------------------------------------------------------------------------------------------------------------------------------------------------------------------------------------------------------------------------------------------------------------------------------------------------------------------------------------------------------------------------------------------------------------------------------------------------------------------------------------|
| Journal:                      | <i>BMJ Open</i>                                                                                                                                                                                                                                                                                                                                                                                                                                                                                                                                                                                                                                                                                                                                                                                                                                                                                                                                                                                                                                                                                           |
| Manuscript ID                 | bmjopen-2019-029590                                                                                                                                                                                                                                                                                                                                                                                                                                                                                                                                                                                                                                                                                                                                                                                                                                                                                                                                                                                                                                                                                       |
| Article Type:                 | Research                                                                                                                                                                                                                                                                                                                                                                                                                                                                                                                                                                                                                                                                                                                                                                                                                                                                                                                                                                                                                                                                                                  |
| Date Submitted by the Author: | 01-Feb-2019                                                                                                                                                                                                                                                                                                                                                                                                                                                                                                                                                                                                                                                                                                                                                                                                                                                                                                                                                                                                                                                                                               |
| Complete List of Authors:     | <p>Tu, Runqi<br/>         Li, Yuqian; Department of Clinical Pharmacology, School of Pharmaceutical Science, Zhengzhou University, Zhengzhou, Henan, PR. China,<br/>         Shen, Lijun<br/>         Yuan, HuiJuan; Institute of People's Hospital of Zhengzhou University, Department of Endocrinology and Metabolism<br/>         Mao, Zhenxing<br/>         Liu, Xiaotian; Department of Epidemiology and Biostatistics, College of Public Health, Zhengzhou University, Zhengzhou, Henan, PR. China.<br/>         Zhang, Haiqing<br/>         zhang, Liying; College of Public Health, Zhengzhou University, Department of Epidemiology and Biostatistics<br/>         Li, Ruiying; College of Public Health, Zhengzhou University<br/>         Wang, Yikang<br/>         Wang, Yuming; Henan Provincial People's Hospital, Zhengzhou, Department of Endocrinology and Metabolism; Zhengzhou University People's Hospital, Department of Endocrinology and Metabolism<br/>         Wang, Chongjian; Zhengzhou University, Department of Epidemiology and Biostatistics, College of Public Health</p> |
| Keywords:                     | physical activity, sedentary behaviour, prevalence, rural population                                                                                                                                                                                                                                                                                                                                                                                                                                                                                                                                                                                                                                                                                                                                                                                                                                                                                                                                                                                                                                      |
|                               |                                                                                                                                                                                                                                                                                                                                                                                                                                                                                                                                                                                                                                                                                                                                                                                                                                                                                                                                                                                                                                                                                                           |

SCHOLARONE™  
 Manuscripts

**Title:**

**The prevalence and influence factors of physical activity and sedentary behavior in Chinese rural population: The Henan Rural Cohort Study**

**Authors:**

Runqi Tu<sup>a†</sup>, Yuqian Li<sup>b†</sup>, Lijun Shen<sup>c,d</sup>, Huijuan Yuan<sup>c,d</sup>, Zhenxing Mao<sup>a</sup>, Xiaotian Liu<sup>a</sup>, Haiqing Zhang<sup>a</sup>, Liying Zhang<sup>a</sup>, Ruiying Li<sup>a</sup>, Yikang Wang<sup>a</sup>, Yuming Wang<sup>c,d\*</sup>, Chongjian Wang<sup>a\*</sup>

**Authors affiliations:**

<sup>a</sup> Department of Epidemiology and Biostatistics, College of Public Health, Zhengzhou University, Zhengzhou, Henan, *PR* China.

<sup>b</sup> Department of Clinical Pharmacology, School of Pharmaceutical Science, Zhengzhou University, Zhengzhou, Henan, *PR* China.

<sup>c</sup> Department of Endocrinology and Metabolism, Henan Provincial People's Hospital, Zhengzhou, Henan, *PR* China.

<sup>d</sup> Department of Endocrinology and Metabolism, Zhengzhou University People's Hospital, Zhengzhou, Henan, *PR* China.

† Runqi Tu and Yuqian Li contributed equally to this work.

**\* Correspondence author**

Dr. Chongjian Wang & Yuming Wang

Department of Epidemiology and Biostatistics

College of Public Health, Zhengzhou University

100 Kexue Avenue, Zhengzhou, 450001, Henan, *PR* China

Phone: +86 371 67781452;

Fax: +86 371 67781868

E-mail: [tjwcj2005@126.com](mailto:tjwcj2005@126.com) & [henanyuming@sina.com](mailto:henanyuming@sina.com)

1  
2  
3 **What is already known on this topic?**  
4

5 Previous studies had explored the prevalence of physical activity and sedentary behaviour  
6 among inhabitants of urban China , but there is little evidence in rural areas of China that have  
7 undergone rapid socio-economic development. Therefore, updating the prevalence and risk factors  
8 of physical activity and sedentary behaviour, and then evaluating the levels of physical activity  
9 and sedentary behaviour in rural areas of China could provide important evidence to generate  
10 strategy and promote physical activity in the population.  
11  
12  
13  
14  
15  
16

17 **What does this study add?**  
18

19  
20 The results of the current data showed that the prevalence of physical inactivity was 32.02%  
21 and sitting>7.5 hours per day was 26.60% was relatively higher, which suggest a higher  
22 prevalence of physical inactivity and sedentary behaviour among Chinese rural adults. More  
23 attention should be given to the aged, divorced/widowed/unmarried and drinking individuals who  
24 are at high risk of physical inactivity. These population should take measures to promote the  
25 physical activity and decrease the sitting time.  
26  
27  
28  
29  
30  
31  
32  
33  
34  
35  
36  
37  
38  
39  
40  
41  
42  
43  
44  
45  
46  
47  
48  
49  
50  
51  
52  
53  
54  
55  
56  
57  
58  
59  
60

**Strengths and limitations of this study**

- The study was focused on rural population.
- The higher prevalence of physical inactivity was 32.02% and the sitting >7.5 hours per day was 26.60%
- The aged, divorced/widowed/unmarried and drinking individuals who are at high risk of physical activity.
- The results were based on a cross-sectional study, so the causal relationships between factors and physical activity could not be confirmed.

## Abstract

**Objectives:** There is little evidence in rural areas of China about the prevalence of physical activity. The study aimed to estimate prevalence and influencing factors of physical activity and sedentary behaviour in rural areas of China

**Methods:** 38515 participants aged 18 to 79 years were enrolled from the Henan Rural Cohort Study for the cross-sectional study. The prevalence of physical activity and sedentary behaviour were estimated. Multiple logistic regression analysis was used to calculate odds ratios (*ORs*) and 95% confidence interval (*CI*) of potential influencing factors with physical inactivity.

**Results:** The age-standardized prevalence of low physical activity and sitting >7.5 hours per day were 32.74% and 26.88% in the general Chinese rural adults, respectively. Gender differences were: 34.91%, 29.76% for men and 31.75%, 25.16% for women respectively. The prevalence of participants with both low physical activity and sitting >7.5 hours per day was 13.95%. 70-79 age group, divorced/widowed/unmarried, ever drinking were negatively associated with low physical activity and sitting >7.5 hours per day.

**Conclusion:** Physical inactivity and sedentary behaviour were high in rural China. There is an increased need in promoting healthy lifestyle to rural population.

**Key words:** physical activity; sedentary behaviour; prevalence; rural population

## Introduction

Over the past few decades, epidemiologic studies have suggested that physical inactivity or sedentary behaviour were risk factors for non-communicable (NCDs), such as breast cancer<sup>[1]</sup>, prostate cancer<sup>[2]</sup>, cardiovascular diseases (CVD)<sup>[3]</sup>, stroke<sup>[4]</sup>, type 2 diabetes<sup>[5]</sup>, and metabolic syndrome<sup>[6]</sup>. Physical inactivity is the physical activity levels unable to meet recommended levels<sup>[7]</sup>. Sedentary behaviour is on the other hand any walking behaviour characterized by an energy expenditure  $\leq 1.5$  metabolic equivalents (Mets), while in a sitting or reclining posture<sup>[8]</sup>.

A research about prevalence of sitting in 20 countries showed that the sitting median was 300 minutes/day and the mean was 346.2 minutes/day, and also proved that there was a linear positive relationship between light physical activity and sitting time. Conversely, there was a linear inverse relationship between vigorous physical activity and sitting time<sup>[9,10]</sup>. Besides physical inactivity and sedentary behavior, vigorous physical activity was also an index of physical activity levels. A global physical activity research showed that there were large differences between regions: 38.0% in Africa, 24.6% in Americas, 43.2% in eastern Mediterranean, 25.4% in Europe, 43.2% in southeast Asia, and 35.3% in the western Pacific<sup>[11]</sup>. With the development of science and technology, agricultural mechanization in rural areas led to reductions in physical activity levels.

Overall, compared to less active, individuals who are more active are more likely to have healthy body mass index and less risk of CVD and other chronic non-communicable diseases. However, the prevalence of physical activity and sedentary behaviour were unclear in rural areas of China. So the objective of current study were: (1) to explore the prevalence of physical activity and sedentary behaviour, (2) to investigate potential influencing factors of physical activity and sedentary behaviour.

## Participants and method

### Settings and participants

This cross-sectional study was carried from 2015 to 2017 in 5 rural regions (Suiping, Yuzhou, Xinxiang, Tongxu, and Yima countries) of Henan province. The participants were permanent residents aged 18-79 years. Some target participants with deficient information about their physical activity and sitting time were excluded. Ultimately, 38515 participants with completed questionnaires, anthropometric measurements and blood tests were included in our analysis.

## Data collection

The information was collected by face to face interview. The data about general demographic characteristics, lifestyles, and history of diseases were included in a standard questionnaire. Educational level was classified into primary school or below and junior middle school or above, marital status into married/cohabitation and unmarried/divorced/widowed categories. The smoking status were categorized into never, ever and current smoker (a person who smoked more than one cigarette per day in the past 6 months was considered a current smoker). The drinking status were divided into never, ever and current drinker of alcoholic beverages (spirits, beer, wine, and other alcohol beverages) at least 12 times in the past year and drinking now. According to Chinese dietary guidelines<sup>[12]</sup>, More vegetable and fruit intake was considered as daily consumption of vegetable and fruit more than 500 g. A person's diet was defined as high fat diet, if they ate more than 75 g meat daily. The waist circumference (WC), by a non-elastic tape to the nearest 0.1 cm, was measured at 1 cm above the navel in a horizontal plane. Height, using a wall-mounted ruler tape with an insertion buckle at one end to the nearest 0.1 cm, was measured twice without shoes. Body weight, using mechanical scale on a level surface to the nearest 0.1 kg, was measured once with the subjects in light clothing and barefoot<sup>[13]</sup>. Body mass index (BMI) was calculated as weight in kilograms divided by the square of height in meters.

## Definitions

International Physical Activity Questionnaire (IPAQ) was used to assess the levels of Physical activity<sup>[14]</sup>. All the weekly time of vigorous activity, moderate activity and walking was calculated with the number of Mets in each category and average daily estimated. Mets reflected the energy expenditure specific for vigorous activity, moderate activity and walking. In this study, the Mets of vigorous activity was 8; the Mets of moderate activity was 4; the Mets of walking was 3,3. The value of Mets was estimated by the sum of the three physical activities in one week. The physical activity categorized into three levels were light (physically inactive), moderate and vigorous. These categories were based on standard scoring criteria of IPAQ. The vigorous activity should meet either of the following two criteria: (1) vigorous activity was at least 3 days/week and the week of accumulating Mets was at least 1500 MET-minutes/week; or (2) any combination of vigorous activity, moderate activity or walking at least 5 days/week and the accumulating Mets was at least 3000 MET-minutes/week. The moderate activity should meet either of the following



1  
2  
3  
4 four criteria: (1) moderate activity was at least 30 min in 5 days a week;(2) vigorous activity was  
5 at least 20 min in 3 days a week; (3) walking at least 30 min a day for 5 or more days a week; (4)  
6 the accumulating Mets, of any combination of moderate activity, vigorous activity or walking, was  
7 at least 600 MET-minutes/week in 5 or more days a week. the light activity category were for  
8 individuals who neither met vigorous nor moderate criteria.  
9  
10  
11  
12

### 13 **Statistical analysis**

14  
15 Continuous variables were presented as mean  $\pm$  standard deviation (SD). Differences between  
16 groups were tested using t-test. Categorical variables presented as numbers and percentages were  
17 compared using chi-square test. Based on Chinese population data from 2010 census, direct  
18 standardization was used to calculate the age-standardized prevalence of Mets. The multinomial  
19 logistic regression models were used to calculate ORs and 95% CI between the potential factors  
20 and Mets. All statistical tests were two-tailed, and P value<0.05 was considered statistically  
21 significant. The data were analyzed using SAS9.1 software package (SAS Institute, USA) and R  
22 version 3.5.1.  
23  
24  
25  
26  
27  
28  
29

### 30 **Result**

#### 31 **Demographic characteristics.**

32  
33 Table1 showed the demographic characteristics of the 38515 participants aged from 18 to 79  
34 years old. The mean (standard deviation, SD) age was 55.65(12.14) years. Overall, a total of  
35 11510, 14672 and 12333 subjects were engaged in vigorous, moderate and light physical activity,  
36 respectively. Being man, current smoking and current drinking were more common among  
37 vigorous activity participants, while younger age, being women, Married/cohabiting, never  
38 smoking and drinking, more adequate vegetable and fruit intake and high fat diet were more  
39 prevalent among moderate physical activity participants. Among the 38515 participants, 29270  
40 were sitting $\leq$ 7.5 hours per day. Except for high fat diet, all other characteristics were more  
41 prevalent in the subjects with sitting $\leq$ 7.5 hours per day than sitting $>$ 7.5 hours per day( $p<0.001$ ).  
42  
43  
44  
45  
46  
47  
48  
49  
50  
51

#### 52 **The sex-specific distributions of physical activity and sitting time according to age.**

53  
54 Figure 1 describes the sex-specific distribution of the Mets of physical activity and sitting time  
55 according to age. The median of Mets for physical activity and sitting time were 7092 MET-  
56 minutes/week and 5 h., respectively. The median of Mets for physical activity and sitting time  
57 were 6558 MET-minutes/week, 7119 MET-minutes/week and 5 h, 5 h for men and women,  
58  
59  
60

1  
2  
3  
4 respectively. The mean  $\pm$  standard deviation (SD) of Mets for physical activity and sitting time  
5  
6 were 7626.02 $\pm$ 4229.32 MET-minutes/week and 5.70 $\pm$ 3.23 h., respectively. The mean  $\pm$  SD of  
7  
8 Mets for physical activity and sitting time were 7506.15 $\pm$ 4524.75 MET-minutes/week, 7704.20 $\pm$   
9  
10 4023.12 MET-minutes/week and 5.97 $\pm$ 3.39 h, 5.53 $\pm$ 3.12 h for men and women ( $P < 0.001$ ),  
11  
12 respectively. Notably, the sitting time of the men was higher than women. The 50-59 age group  
13  
14 had the highest Mets. The 70-79 age group had the highest sitting time.

#### 15 **Prevalence of light physical activity and sitting >7.5 hours per day.**

16  
17 Supplementary table 1 displays the prevalence of light physical activity and sitting >7.5 hours  
18  
19 per day among various characteristics. The prevalence of light physical activity and sitting >7.5  
20  
21 hours per day were 32.02% and 26.60%, and the corresponding age-standardized rates were  
22  
23 32.90% and 26.88%, respectively. Subgroups study showed that the prevalence of low physical  
24  
25 activity and sitting >7.5 hours per day were higher in those who were younger or older, being men,  
26  
27 Widowed/single/divorced/separated with lower per capita monthly income, ever drinking,  
28  
29 inadequate vegetable and fruit intake.

#### 30 **Changes of light physical activity and sitting >7.5 hours per day in different subgroup.**

31  
32 Figure 2 presents that the age-standardized prevalence of light physical activity and sitting >7.5  
33  
34 hours per day changed with age in both sexes. The prevalence of light physical activity and  
35  
36 sitting >7.5 hours per day decreased with age firstly and then increased. Men had higher  
37  
38 probability of having high physical activity and sitting >7.5 hours per day than women in all the  
39  
40 age groups.

#### 41 **The percentage according to the cut-off points of physical activity and sitting time in 42 different sexes.**

43  
44 Figure 3 shows the age-standardized percentage according to the cut-off points of physical  
45  
46 activity and sitting time in different sexes. A total of 17346 subjects (7434 men and 9912 women)  
47  
48 had light physical activity or sitting >7.5 hours per day, and the corresponding age-standardized  
49  
50 prevalence was 45.84% (48.99% in men and 43.98% in women). The age-standardized prevalence  
51  
52 of participants with both light physical activity and single sitting >7.5 hours per day was 13.95%  
53  
54 (15.68% in men and 12.93% in women).

#### 55 **Analysis of influencing factors.**

56  
57 Table 2 describes the odds ratios (ORs) of potential influencing factors association with light  
58  
59  
60

1  
2  
3  
4 physical activity and sitting time >7.5 hours per day. Being women, 70-79 age group, level of  
5 education  $\geq$  Junior middle school, divorced/widowed/unmarried, ever smoking and drinking,  
6 inadequate vegetable and fruit intake were significantly negatively associated with light physical  
7 activity, while being women, level of education  $\geq$  Junior middle school, inadequate vegetable and  
8 fruit intake and current smoking were significantly positively association with sitting >7.5 hours  
9 per day.  
10  
11  
12  
13  
14  
15  
16  
17  
18  
19  
20  
21  
22  
23  
24  
25  
26  
27  
28  
29  
30  
31  
32  
33  
34  
35  
36  
37  
38  
39  
40  
41  
42  
43  
44  
45  
46  
47  
48  
49  
50  
51  
52  
53  
54  
55  
56  
57  
58  
59  
60

For peer review only

## Discussion

New insights of physical activity and sedentary behaviour were provided by the results from this large survey among rural population in Henan of China. Overall, the median levels of sitting time were higher in rural adults of China than the previous study of a 20 country comparison of sitting<sup>[9]</sup>, and the percent levels of physical inactivity were higher in Chinese rural adults than the previous study of global physical activity levels<sup>[11]</sup>. There was an association of decreased physical activity with age firstly and then increased in the prevalence of light physical activity and sitting>7.5 hours per day. The percent individuals that had both light physical activity and sitting>7.5 hours per day were 15.68%, 12.93% and 13.95% in men, women and total, respectively. Further analysis of multiple logistic regression presented that gender, age, the level of education, marital status, smoking, drinking and vegetables intake were influencing factors for light physical activity and sitting>7.5 hours.

Previous studies had shown that the levels of physical inactivity and sedentary was high in urban China<sup>[15,16]</sup>. Compared with those in urban area, the levels of physical inactivity and sedentary was relatively low in rural area of China. This gap between the urban and rural might be explained by the more use of intelligent technology for urban construction, with the social progress, scientific and economic development. The mean of Mets increased with age firstly and then at the age group of 50-59 decreased. While the sitting time was highest in 70-79 age group. It is likely that the decline in physical ability with age limits the physical activity and increase the sedentary nature of the elderly<sup>[17]</sup>. Furthermore, the aged might fear injuries, which was another reason to lead them into physical inactivity<sup>[18]</sup>. About physical activity, the subgroup analysis showed that under the various characteristics, the prevalence of vigorous physical activity was about 30%, moderate physical activity was about 40% and the light physical activity was about 30%. While about sitting time, under all the various characteristics, the sitting time≤7.5 hours per day was about 70%. These results were similar to a Chilean study<sup>[18]</sup>.

The results of co-existence of physical activity and sedentary behavior showed that light physical activity and sitting time>7.5 hours per day was 15.68%, 12.93% and 13.95% in men, women and total, respectively. It was similar with a study from Japan<sup>[19]</sup>. For these participants who were light physical activity and sitting time>7.5 hours per day, should take a measure to

1  
2  
3  
4 promote the physical activity.

5 Evidence showed that there were negative relationships between junior middle school or above,  
6 divorced/widowed/unmarried, per capita monthly income  $\geq 500$  RMB and high fat diet with  
7 moderate physical activity. Being elderly (70-79 years old), having a junior middle school or  
8 above, divorced/widowed/unmarried, ever smoking, and ever drinking were positively association  
9 with light physical activity. For sitting  $> 7.5$  hours per day, the negative factors were 70-79 years  
10 old, being men, divorced/widowed/unmarried, current smoking, ever drinking, and more vegetable  
11 intake.  
12  
13  
14  
15  
16  
17  
18

19 The current study focused on the epidemiologic characteristics of physical activity and  
20 sedentary behaviour based on a relatively large sample size of rural population in Henan of China.  
21 Although a series of measures, such as standardized tools and training implementation, had been  
22 done to guarantee the authenticity, there were several limitations. First of all, these results were  
23 based on a cross-sectional study, so the causal relationships between factors and physical activity  
24 or sedentary behaviour could not be confirmed. Second, the responses were from self-reported  
25 data, which could distort real facts. Third, according to the actual rural circumstances, the  
26 residents who studied or worked in cities were not included in this study, so the prevalence of  
27 Mets might be over or under estimated in rural population. Although these limitations existed in  
28 the study, the relatively large epidemiological study also could reflect the prevalence of physical  
29 activity and sedentary behaviour in rural areas of China.  
30  
31  
32  
33  
34  
35  
36  
37  
38  
39

#### 40 **Conclusion**

41 This study suggests relatively higher prevalence of physical inactivity among Chinese rural  
42 adults has emerged with economic and social transition. More attention should be given to the  
43 aged, and drinking individuals who are at high risk of physical inactivity.  
44  
45  
46  
47  
48

#### 49 **Acknowledgements**

50 The authors thank all of the participants, coordinators, and administrators for their support and  
51 help during the research. In addition, the authors would like to thank Dr. Tanko Abdulai for his  
52 critical reading of the manuscript.  
53  
54  
55  
56

#### 57 **Ethics approval and consent to participate**

58 Ethics approval was obtained from the “Zhengzhou University Life Science Ethics Committee”,  
59  
60

1  
2  
3  
4 and written informed consent was obtained for all participants. Ethic approval code: [2015] MEC  
5  
6 (S128).

7 The purpose and the importance of the study were explained to the participants. Information  
8  
9 confidentiality was maintained throughout the study by excluding personal identifiers from the  
10  
11 data collection form.  
12

### 13 14 **Consent for publication**

15  
16 All authors consent for publication  
17

### 18 19 **Conflict of interest**

20  
21 The authors declared no conflict of interest associated with this manuscript.  
22

### 23 24 **Funding**

25  
26 This research was supported by the National Key Research and Development Program  
27  
28 Precision Medicine Initiative of China (Grant NO: 2016YFC0900803), National Natural Science  
29  
30 Foundation of China (Grant NO: 81573243, 81602925), Henan Science and Technology  
31  
32 Development Funds (Grant NO: 182207310001), Henan Natural Science Foundation (Grant NO:  
33  
34 182300410293), Science and Technology Foundation for Innovation Talent of Henan Province  
35  
36 (Grant NO: 164100510021), Science and Technology Innovation Talents Support Plan of Henan  
37  
38 Province Colleges and Universities (Grant NO: 14HASTIT035). The funders had no role in the  
39  
40 study design, data collection and analysis, decision to publish, or preparation of the manuscript.  
41

### 42 43 **Data sharing statement**

44  
45 All relevant data are within the paper and its Supporting Information files. Contact to Dr.  
46  
47 Chongjian Wang (tjwcj2005@126.com) for additional information regarding data access.

### 48 49 **Author Contributions**

50  
51 C.J.W. and Y.M.W. conceived and designed the study. R.Q.T., Y.L.Q., L.J.S., H.J.Y., Z.X.M.,  
52  
53 X.T.L., H.Q.Z., L.Y.Z., R.Y.L, and Y.K.W. coordinated data collection. Y.L.Q., L.J.S., H.J.Y.,  
54  
55 Z.X.M., X.T.L., H.Q.Z., L.Y.Z., R.Y.L, and Y.K.W. conducted the analyses. R.Q.T. wrote the  
56  
57 manuscript. All co-authors critically revised the manuscript. All authors have approved the final  
58  
59 manuscript.  
60

### **Reference**

- 1  
2  
3  
4 [1] Fararouei M, Iqbal A, Rezaian S, Gheibi Z, Dianatinasab A, Shakarami S, Dianatinasab M.  
5 Dietary Habits and Physical Activity are Associated With the Risk of Breast Cancer Among  
6 Young Iranian Women: A Case-control Study on 1010 Premenopausal Women. *Clin Breast*  
7 *Cancer*. 2018 Nov 2. pii: S1526-8209(18)30622-0.  
8  
9  
10  
11 [2] Sormunen J, Talibov M, Sparén P, Martinsen JI, Weiderpass E, Pukkala E. Perceived Physical  
12 Strain at Work and Incidence of Prostate Cancer – a Case-Control Study in Sweden and Finland.  
13 *Asian Pac J Cancer Prev*. 2018 Aug 24;19(8):2331-2335.  
14  
15  
16 [3] Ambakederemo TE, Chikezie EU. Assessment of some traditional cardiovascular risk factors  
17 in medical doctors in Southern Nigeria. *Vasc Health Risk Manag*. 2018 Oct 24;14:299-309.  
18  
19  
20 [4] Sarfo FS, Mobula LM, Plange-Rhule J, Ansong D, Ofori-Adjei D. Incident stroke among  
21 Ghanaians with hypertension and diabetes: A multicenter, prospective cohort study. *J Neurol Sci*.  
22 2018 Dec 15;395:17-24.  
23  
24  
25 [5] Chang C, Khurana S, Strodel R, Camp A, Magenheimer E, Hawley N. Perceived Barriers to  
26 Physical Activity Among Low-Income Latina Women at Risk for Type 2 Diabetes. *Diabetes*  
27 *Educ*. 2018 Oct;44(5):444-453.  
28  
29  
30 [6] El Bilbeisi AH, Hosseini S, Djafarian K. The Association between Physical Activity and the  
31 Metabolic Syndrome among Type 2 Diabetes Patients in Gaza Strip, Palestine. *Ethiop J Health*  
32 *Sci*. 2017 May;27(3):273-282.  
33  
34  
35 [7] Global Reference List of 100 Core Health Indicators. 2015. World Health Organization.  
36  
37  
38 [8] Tremblay MS, Aubert S, Barnes JD, Saunders TJ, Carson V, Latimer-Cheung AE, Chastin  
39 SFM, Altenburg TM, Chinapaw MJM; SBRN Terminology Consensus Project Participants.  
40 Sedentary Behavior Research Network (SBRN) - Terminology Consensus Project process and  
41 outcome. *Int J Behav Nutr Phys Act*. 2017 Jun 10;14(1):75.  
42  
43  
44 [9] Bauman A, Ainsworth BE, Sallis JF, Hagströmer M, Craig CL, Bull FC, Pratt M, Venugopal  
45 K, Chau J, Sjöström M; IPS Group. The descriptive epidemiology of sitting. A 20-country  
46 comparison using the International Physical Activity Questionnaire (IPAQ). *Am J Prev Med*. 2011  
47 Aug;41(2):228-35.  
48  
49  
50 [10] Thorp AA, Owen N, Neuhaus M, Dunstan DW. Sedentary behaviors and subsequent health  
51 outcomes in adults a systematic review of longitudinal studies, 1996-2011. *Am J Prev Med*. 2011  
52 Aug;41(2):207-15.  
53  
54  
55  
56  
57  
58  
59  
60

- 1  
2  
3  
4 [11] Hallal PC, Andersen LB, Bull FC, Guthold R, Haskell W, Ekelund U; Lancet Physical  
5 Activity Series Working Group. Global physical activity levels: surveillance progress, pitfalls, and  
6 prospects. *Lancet*. 2012 Jul 21;380(9838):247-57.  
7  
8  
9 [12] China Public Union of Nutrition. The Dietary Guidelines for Chinese Residents, China Public  
10 Union of Nutrition, 2011.  
11  
12 [13] People's Republic of China Ministry of Health Disease Control Division. Overweight and  
13 Obesity Prevention and Control Guidelines in Chinese Adults, People's Republic of China  
14 Ministry of Health Disease Control Division, Beijing, China, 2003 (Chinese).  
15  
16 [14] Bauman A, Bull F, Chey T, Craig CL, Ainsworth BE, Sallis JF, Bowles HR, Hagstromer M,  
17 Sjostrom M, Pratt M; IPS Group. The International Prevalence Study on Physical Activity: results  
18 from 20 countries. *Int J Behav Nutr Phys Act*. 2009 Mar 31;6:21.  
19  
20 [15] Zhou Y, Wu J, Zhang S, Yan S, He L, Mkandawire N, Song X, Gan Y, Li W, Yang T, Li J,  
21 Zeng X, Wang Z, Lu Z. Prevalence and risk factors of physical inactivity among middle-aged and  
22 older Chinese in Shenzhen: a cross-sectional study. *BMJ Open*. 2018 Oct 15;8(10):e019775.  
23  
24 [16] Chen ST, Liu Y, Hong JT, Tang Y, Cao ZB, Zhuang J, Zhu Z, Chen PJ. Co-existence of  
25 physical activity and sedentary behavior among children and adolescents in Shanghai, China: do  
26 gender and age matter? *BMC Public Health*. 2018 Nov 22;18(1):1287.  
27  
28 [17] Crespo CJ, Smit E, Andersen RE, Carter-Pokras O, Ainsworth BE. Race/ethnicity, social  
29 class and their relation to physical inactivity during leisure time: results from the Third National  
30 Health and Nutrition Examination Survey, 1988-1994. *Am J Prev Med*. 2000 Jan;18(1):46-53.  
31  
32 [18] Celis-Morales C, Salas C, Alduhishy A, Sanzana R, Martínez MA, Leiva A, Diaz X,  
33 Martínez C, Álvarez C, Leppe J, Munro CA, Siervo M, Willis ND. Socio-demographic patterns of  
34 physical activity and sedentary behaviour in Chile: results from the National Health Survey 2009-  
35 2010. *J Public Health (Oxf)*. 2016 Jun;38(2):e98-e105.  
36  
37 [19] Liao Y, Shibata A, Ishii K, Oka K. Independent and Combined Associations of Physical  
38 Activity and Sedentary Behavior with Depressive Symptoms Among Japanese Adults. *Int J Behav*  
39 *Med*. 2016 Aug;23(4):402-9.  
40  
41  
42  
43  
44  
45  
46  
47  
48  
49  
50  
51  
52  
53  
54  
55  
56  
57  
58  
59  
60



**Table1. Demographic characteristics of the participants**

| Variable                                      | Overall<br>(N=38515) | Physical activity     |                       |                    | <i>P</i> | Sitting time per day    |                         | <i>P</i> |
|-----------------------------------------------|----------------------|-----------------------|-----------------------|--------------------|----------|-------------------------|-------------------------|----------|
|                                               |                      | Vigorous<br>(N=11510) | Moderate<br>(N=14672) | Light<br>(N=12333) |          | ≤7.5 hours<br>(N=29270) | >7.5 hours<br>(N=10245) |          |
| Age(years), mean±SD                           | 55.65±12.14          | 55.48±10.81           | 54.62±12.05           | 57.02±13.25        | <0.001   | 55.46±11.93             | 56.17±12.68             | <0.001   |
| Sex, n (%)                                    |                      |                       |                       |                    | <0.001   |                         |                         | <0.001   |
| Women                                         | 23331(60.52)         | 5963(51.81)           | 10402(70.90)          | 6945(56.31)        |          | 17588(62.21)            | 5722(55.85)             |          |
| Men                                           | 15205(39.48)         | 5547(48.19)           | 4270(29.10)           | 5388(43.69)        |          | 10682(37.79)            | 4523(44.15)             |          |
| Marital status, n (%)                         |                      |                       |                       |                    | <0.001   |                         |                         | <0.001   |
| Married/cohabiting                            | 34571(89.76)         | 10567(91.81)          | 13231(90.18)          | 10773(87.35)       |          | 25502(90.20)            | 9069(88.50)             |          |
| Widowed/single/<br>divorced/separated         | 3944(10.24)          | 943(8.19)             | 1441(9.82)            | 1560(12.65)        |          | 2768(9.80)              | 1176(11.50)             |          |
| Education, n (%)                              |                      |                       |                       |                    | 0.234    |                         |                         | 0.001    |
| ≤Primary school                               | 17277(44.86)         | 5149(44.74)           | 6521(44.45)           | 5607(45.46)        |          | 12533(44.33)            | 4744(46.31)             |          |
| ≥Junior school                                | 21238(55.14)         | 6361(55.26)           | 8151(55.55)           | 6726(54.54)        |          | 15737(55.67)            | 5501(53.69)             |          |
| Per capita monthly<br>income, n (%)           |                      |                       |                       |                    | <0.001   |                         |                         | <0.001   |
| ≤500RMB                                       | 13746(35.69)         | 4169(36.22)           | 4841(32.99)           | 4736(38.40)        |          | 9812(34.71)             | 3934(38.40)             |          |
| 500RMB~                                       | 12657(32.86)         | 3724(32.35)           | 4959(33.80)           | 3974(32.22)        |          | 9720(34.38)             | 2937(28.67)             |          |
| ≥1000RMB                                      | 12112(31.45)         | 3617(31.42)           | 4872(33.21)           | 3623(29.38)        |          | 8738(30.91)             | 3374(32.93)             |          |
| Smoking, n (%)                                |                      |                       |                       |                    | <0.001   |                         |                         | <0.001   |
| Never                                         | 28023(72.76)         | 7652(66.48)           | 11768(80.21)          | 8603(69.76)        |          | 20929(74.03)            | 7094(69.24)             |          |
| Ever                                          | 3149(8.18)           | 1036(9.00)            | 855(5.83)             | 1258(10.20)        |          | 2212(7.82)              | 937(9.15)               |          |
| Current                                       | 7343(19.07)          | 2822(24.52)           | 2049(13.97)           | 2472(20.04)        |          | 5129(18.14)             | 2214(21.61)             |          |
| Drinking, n (%)                               |                      |                       |                       |                    | <0.001   |                         |                         | <0.001   |
| Never                                         | 29751(77.25)         | 8221(71.42)           | 12201(83.16)          | 9329(75.64)        |          | 22009(77.85)            | 7742(75.57)             |          |
| Ever                                          | 1807(4.69)           | 557(4.84)             | 509(3.47)             | 741(6.01)          |          | 1149(4.06)              | 658(6.42)               |          |
| Current                                       | 6957(18.06)          | 2732(23.74)           | 1962(13.37)           | 2263(18.35)        |          | 5112(18.08)             | 1845(18.01)             |          |
| Adequate vegetable and<br>fruit intake, n (%) | 22300(57.90)         | 5054(43.91)           | 6956(47.41)           | 4205(34.10)        | <0.001   | 11061(39.13)            | 5154(50.31)             | <0.001   |
| High fat diet, n (%)                          | 31150(80.88)         | 2254(19.58)           | 3084(21.02)           | 2027(16.44)        | <0.001   | 5393(19.08)             | 1972(19.25)             | 0.705    |
| Height(cm), mean ± SD                         | 159.69±8.20          | 160.65±8.24           | 158.62±7.84           | 160.07±8.43        | <0.001   | 159.59±8.17             | 159.98±8.28             | <0.001   |
| Weight(kg), mean ± SD                         | 63.48±11.14          | 63.92±10.86           | 62.44±10.76           | 64.30±11.72        | <0.001   | 63.60±11.09             | 63.15±11.27             | <0.001   |
| BMI(kg/m <sup>2</sup> ), mean ± SD            | 24.84±3.57           | 24.72±3.46            | 24.77±3.50            | 25.03±3.73         | <0.001   | 24.92±3.56              | 24.61±3.59              | <0.001   |
| WC(cm), mean ± SD                             | 84.07±10.41          | 83.65±10.03           | 83.44±10.19           | 85.22±10.90        | <0.001   | 84.42±10.35             | 83.10±10.50             | <0.001   |

**Table 2. Association of potential risk factors for physical activity and sitting time.**

| Factors                        | OR(95% CI)      |                 |                             |
|--------------------------------|-----------------|-----------------|-----------------------------|
|                                | Moderate        | Light           | Sitting > 7.5 hours per day |
| Age(year)                      |                 |                 |                             |
| 18-                            | 1.00            | 1.00            | 1.00                        |
| 30-                            | 0.76(0.63,0.91) | 0.63(0.52,0.76) | 0.99(0.85,1.15)             |
| 40-                            | 0.53(0.44,0.62) | 0.46(0.39,0.55) | 0.89(0.78,1.02)             |
| 50-                            | 0.51(0.43,0.60) | 0.38(0.32,0.45) | 0.83(0.72,0.94)             |
| 60-                            | 0.52(0.44,0.62) | 0.50(0.42,0.60) | 0.81(0.71,0.93)             |
| 70-79                          | 0.76(0.63,0.91) | 1.21(1.01,1.47) | 1.19(1.03,1.21)             |
| Gender                         |                 |                 |                             |
| Female                         | 1.00            | 1.00            | 1.00                        |
| Male                           | 0.47(0.43,0.51) | 0.81(0.75,0.88) | 1.27(1.18,1.37)             |
| Culture                        |                 |                 |                             |
| ≤Primary school                | 1.00            | 1.00            | 1.00                        |
| ≥Junior middle school          | 1.16(1.09,1.22) | 1.24(1.16,1.31) | 0.90(0.85,0.95)             |
| Marital status                 |                 |                 |                             |
| Married/cohabiting             | 1.00            | 1.00            | 1.00                        |
| Divorced/widowed/<br>unmarried | 1.18(1.08,1.29) | 1.26(1.15,1.38) | 1.12(1.03,1.21)             |
| Per capita monthly income      |                 |                 |                             |
| <500 RMB                       | 1.00            | 1.00            | 1.00                        |
| 500RMB-                        | 1.14(1.07,1.21) | 1.01(0.95,1.07) | 0.79(0.75,0.84)             |
| ≥1000 RMB                      | 1.13(1.09,1.20) | 0.99(0.92,1.05) | 1.00(0.95,1.06)             |
| Smoking                        |                 |                 |                             |
| Never                          | 1.00            | 1.00            | 1.00                        |
| Ever                           | 1.05(0.93,1.18) | 1.18(1.05,1.32) | 1.00(0.90,1.11)             |
| Current                        | 0.93(0.85,1.02) | 0.96(0.88,1.05) | 1.11(1.02,1.21)             |
| Drinking                       |                 |                 |                             |
| Never                          | 1.00            | 1.00            | 1.00                        |
| Ever                           | 1.05(0.92,1.21) | 1.25(1.10,1.42) | 1.34(1.20,1.50)             |
| Current                        | 0.77(0.71,0.84) | 0.84(0.78,0.91) | 0.88(0.82,0.94)             |
| High fat diet                  | 1.22(1.15,1.30) | 0.94(0.88,1.01) | 0.93(0.88,0.99)             |
| More vegetables intake         | 0.47(0.43,0.51) | 0.69(0.65,0.73) | 1.60(1.53,1.68)             |

### Figure Legends

**Figure 1.** The violin chart of metabolic equivalence per week and sitting time per day according to gender and age. (a) is for metabolic equivalence per week; (b) is sitting time per day.

**Figure 2.** Changes in the age-standardized prevalence of physical activity and sitting time with aging in different gender. (a) is for light physical activity; (b) is for moderate physical activity; (c) is for vigorous physical activity. (d) is sitting time  $\leq 7.5$  hours per day; (e) is sitting time  $> 7.5$  hours per day.

**Figure 3.** The age-standardized percentage according to the cut-off points of physical activity and sitting time in different gender. (a) is for total; (b) is for men; (c) is for women.

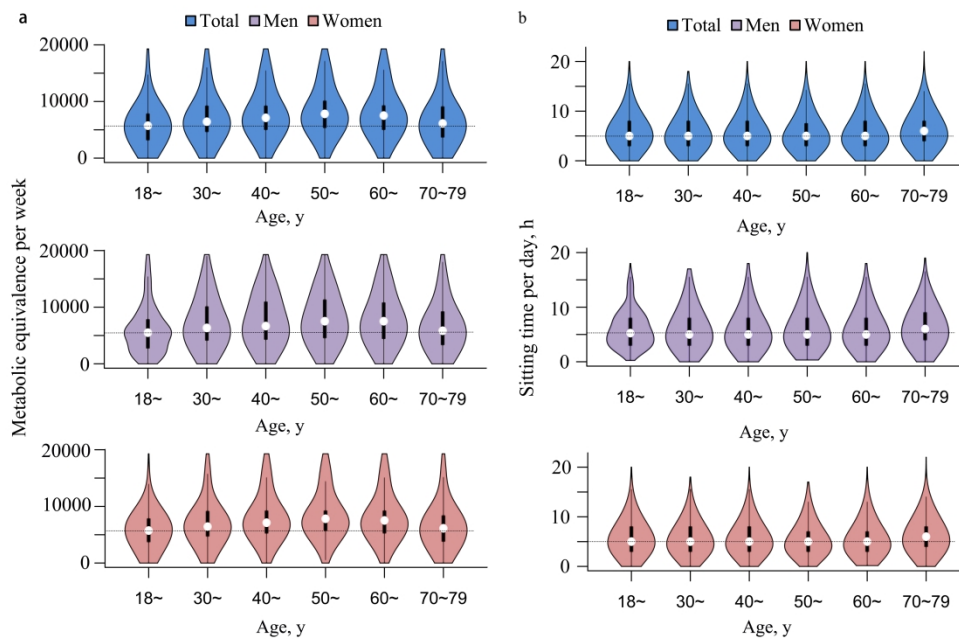

Figure 1. The violin chart of metabolic equivalence per week and sitting time per day according to gender and age. (a) is for metabolic equivalence per week; (b) is sitting time per day.

247x161mm (600 x 600 DPI)

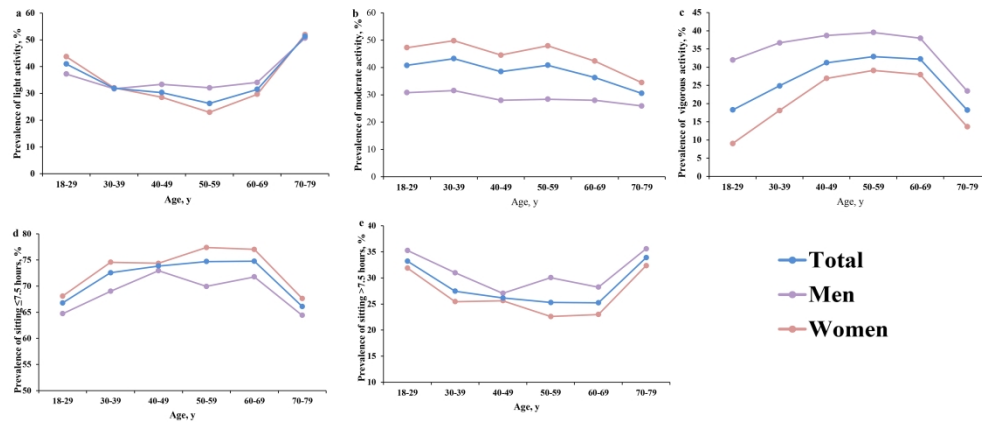

Figure 2. Changes in the age-standardized prevalence of physical activity and sitting time with aging in different gender. (a) is for light physical activity; (b) is for moderate physical activity; (c) is for vigorous physical activity. (d) is sitting time  $\leq 7.5$  hours per day; (e) is sitting time  $> 7.5$  hours per day.

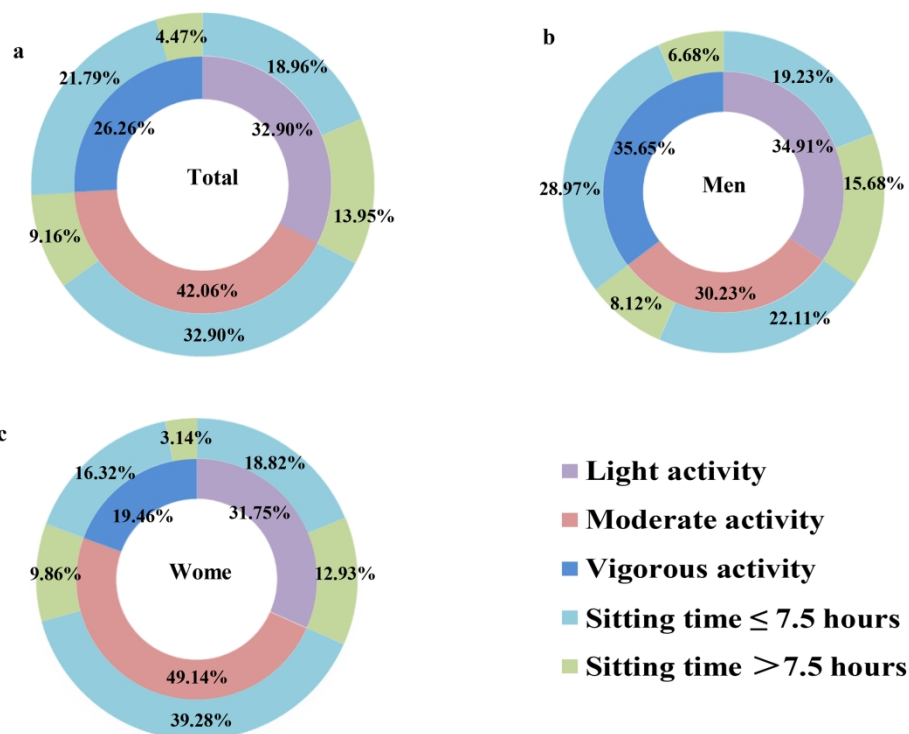

Figure 3. The age-standardized percentage according to the cut-off points of physical activity and sitting time in different gender. (a) is for total; (b) is for men; (c) is for women.

253x194mm (300 x 300 DPI)

Supplementary Table 1. Prevalence of physical activity and sitting time about various characteristics

| Variable                                      | Physical activity     |                       |                    | <i>P</i> | Sitting time per day    |                         | <i>P</i> |
|-----------------------------------------------|-----------------------|-----------------------|--------------------|----------|-------------------------|-------------------------|----------|
|                                               | Vigorous<br>(N=11510) | Moderate<br>(N=14672) | Light<br>(N=12333) |          | ≤7.5 hours<br>(N=29270) | >7.5 hours<br>(N=10245) |          |
| Age, n (%)                                    |                       |                       |                    | <0.001   |                         |                         | <0.001   |
| 18~                                           | 220(17.49)            | 558(44.36)            | 480(38.16)         |          | 910(72.34)              | 348(27.66)              |          |
| 30~                                           | 685(25.19)            | 1172(43.10)           | 862(31.70)         |          | 1975(72.64)             | 744(27.36)              |          |
| 40~                                           | 2275(31.71)           | 2807(39.13)           | 2092(29.16)        |          | 5327(74.25)             | 1847(25.75)             |          |
| 50~                                           | 3539(33.36)           | 4320(40.73)           | 2748(25.91)        |          | 7965(75.09)             | 2642(24.91)             |          |
| 60~                                           | 3861(31.99)           | 4358(36.11)           | 3849(31.89)        |          | 8996(74.54)             | 3072(25.46)             |          |
| 70~79                                         | 930(19.83)            | 1457(31.07)           | 2302(49.09)        |          | 3097(66.05)             | 1592(33.95)             |          |
| Sex, n (%)                                    |                       |                       |                    | <0.001   |                         |                         | <0.001   |
| Women                                         | 5963(25.58)           | 10402(44.62)          | 6945(29.79)        |          | 17588(75.45)            | 5722(24.55)             |          |
| Men                                           | 5547(36.48)           | 4270(28.08)           | 5388(35.44)        |          | 10682(70.25)            | 4523(29.75)             |          |
| Marital status, n (%)                         |                       |                       |                    | <0.001   |                         |                         | <0.001   |
| Married/cohabiting                            | 10567(30.57)          | 13231(38.27)          | 10773(31.16)       |          | 25502(73.77)            | 9069(26.23)             |          |
| Widowed/single/<br>divorced/separated         | 943(23.91)            | 1441(36.54)           | 1560(39.55)        |          | 2768(70.18)             | 1176(29.82)             |          |
| Education, n (%)                              |                       |                       |                    | 0.234    |                         |                         | 0.001    |
| ≤Primary school                               | 5149(29.81)           | 6521(37.74)           | 5607(32.45)        |          | 12533(72.54)            | 4744(27.46)             |          |
| ≥Junior school                                | 6361(29.95)           | 8151(38.38)           | 6726(31.67)        |          | 15737(74.10)            | 5501(25.90)             |          |
| Per capita monthly<br>income, n (%)           |                       |                       |                    | <0.001   |                         |                         | <0.001   |
| ≤500RMB                                       | 4169(30.33)           | 4841(35.22)           | 4736(34.45)        |          | 9812(71.38)             | 3934(28.62)             |          |
| 500RMB~                                       | 3724(29.42)           | 4959(39.18)           | 3974(31.40)        |          | 9720(76.80)             | 2937(23.20)             |          |
| ≥1000RMB                                      | 3617(29.86)           | 4872(40.23)           | 3623(29.91)        |          | 8738(72.14)             | 3374(27.86)             |          |
| Smoking, n (%)                                |                       |                       |                    | <0.001   |                         |                         | <0.001   |
| Never                                         | 7652(27.31)           | 11768(41.99)          | 8603(30.70)        |          | 20292(74.69)            | 7094(25.31)             |          |
| Ever                                          | 1036(32.90)           | 855(27.15)            | 1258(39.95)        |          | 2212(70.24)             | 937(29.76)              |          |
| Current                                       | 2822(38.43)           | 2049(27.90)           | 2472(33.67)        |          | 5129(69.85)             | 2214(30.15)             |          |
| Drinking, n (%)                               |                       |                       |                    | <0.001   |                         |                         | <0.001   |
| Never                                         | 8221(27.63)           | 12201(41.01)          | 9329(31.36)        |          | 22009(73.98)            | 7742(26.02)             |          |
| Ever                                          | 557(30.82)            | 509(28.17)            | 741(41.01)         |          | 1149(63.59)             | 658(36.41)              |          |
| Current                                       | 2732(39.27)           | 1962(28.20)           | 2263(32.53)        |          | 5112(73.48)             | 1845(26.52)             |          |
| Adequate vegetable<br>and fruit intake, n (%) | 5054(31.17)           | 6956(42.90)           | 4205(25.93)        | <0.001   | 11061(68.21)            | 5154(31.79)             | <0.001   |
| High fat diet, n (%)                          | 2254(30.60)           | 3084(41.87)           | 2027(27.52)        | <0.001   | 5393(73.22)             | 1972(26.78)             | 0.705    |

**STROBE 2007 (v4) Statement—Checklist of items that should be included in reports of *cross-sectional studies***

| Section/Topic                | Item # | Recommendation                                                                                                                                                                       | Reported on page # |
|------------------------------|--------|--------------------------------------------------------------------------------------------------------------------------------------------------------------------------------------|--------------------|
| <b>Title and abstract</b>    | 1      | (a) Indicate the study's design with a commonly used term in the title or the abstract                                                                                               | P4                 |
|                              |        | (b) Provide in the abstract an informative and balanced summary of what was done and what was found                                                                                  | P4                 |
| <b>Introduction</b>          |        |                                                                                                                                                                                      |                    |
| Background/rationale         | 2      | Explain the scientific background and rationale for the investigation being reported                                                                                                 | P5                 |
| Objectives                   | 3      | State specific objectives, including any prespecified hypotheses                                                                                                                     | P5                 |
| <b>Methods</b>               |        |                                                                                                                                                                                      |                    |
| Study design                 | 4      | Present key elements of study design early in the paper                                                                                                                              | P5, P6             |
| Setting                      | 5      | Describe the setting, locations, and relevant dates, including periods of recruitment, exposure, follow-up, and data collection                                                      | P5, P6             |
| Participants                 | 6      | (a) Give the eligibility criteria, and the sources and methods of selection of participants                                                                                          | P5, P6             |
| Variables                    | 7      | Clearly define all outcomes, exposures, predictors, potential confounders, and effect modifiers. Give diagnostic criteria, if applicable                                             | P6, P7             |
| Data sources/<br>measurement | 8*     | For each variable of interest, give sources of data and details of methods of assessment (measurement). Describe comparability of assessment methods if there is more than one group | P6, P7             |
| Bias                         | 9      | Describe any efforts to address potential sources of bias                                                                                                                            | P7                 |
| Study size                   | 10     | Explain how the study size was arrived at                                                                                                                                            | P6                 |
| Quantitative variables       | 11     | Explain how quantitative variables were handled in the analyses. If applicable, describe which groupings were chosen and why                                                         |                    |
| Statistical methods          | 12     | (a) Describe all statistical methods, including those used to control for confounding                                                                                                | P7                 |
|                              |        | (b) Describe any methods used to examine subgroups and interactions                                                                                                                  | P7, P8             |
|                              |        | (c) Explain how missing data were addressed                                                                                                                                          | P6                 |
|                              |        | (d) If applicable, describe analytical methods taking account of sampling strategy                                                                                                   | P7                 |
|                              |        | (e) Describe any sensitivity analyses                                                                                                                                                |                    |
| <b>Results</b>               |        |                                                                                                                                                                                      |                    |



|                          |     |                                                                                                                                                                                                              |          |
|--------------------------|-----|--------------------------------------------------------------------------------------------------------------------------------------------------------------------------------------------------------------|----------|
| Participants             | 13* | (a) Report numbers of individuals at each stage of study—eg numbers potentially eligible, examined for eligibility, confirmed eligible, included in the study, completing follow-up, and analysed            | P6       |
|                          |     | (b) Give reasons for non-participation at each stage                                                                                                                                                         | P6       |
|                          |     | (c) Consider use of a flow diagram                                                                                                                                                                           |          |
| Descriptive data         | 14* | (a) Give characteristics of study participants (eg demographic, clinical, social) and information on exposures and potential confounders                                                                     | P6       |
|                          |     | (b) Indicate number of participants with missing data for each variable of interest                                                                                                                          | P6       |
| Outcome data             | 15* | Report numbers of outcome events or summary measures                                                                                                                                                         | P6       |
| Main results             | 16  | (a) Give unadjusted estimates and, if applicable, confounder-adjusted estimates and their precision (eg, 95% confidence interval). Make clear which confounders were adjusted for and why they were included | P7, P8   |
|                          |     | (b) Report category boundaries when continuous variables were categorized                                                                                                                                    | P8       |
|                          |     | (c) If relevant, consider translating estimates of relative risk into absolute risk for a meaningful time period                                                                                             | P9       |
| Other analyses           | 17  | Report other analyses done—eg analyses of subgroups and interactions, and sensitivity analyses                                                                                                               | P8       |
| <b>Discussion</b>        |     |                                                                                                                                                                                                              |          |
| Key results              | 18  | Summarise key results with reference to study objectives                                                                                                                                                     | P10, P11 |
| Limitations              | 19  | Discuss limitations of the study, taking into account sources of potential bias or imprecision. Discuss both direction and magnitude of any potential bias                                                   | P10      |
| Interpretation           | 20  | Give a cautious overall interpretation of results considering objectives, limitations, multiplicity of analyses, results from similar studies, and other relevant evidence                                   | P11      |
| Generalisability         | 21  | Discuss the generalisability (external validity) of the study results                                                                                                                                        | P11      |
| <b>Other information</b> |     |                                                                                                                                                                                                              |          |
| Funding                  | 22  | Give the source of funding and the role of the funders for the present study and, if applicable, for the original study on which the present article is based                                                | P12      |

\*Give information separately for cases and controls in case-control studies and, if applicable, for exposed and unexposed groups in cohort and cross-sectional studies.

**Note:** An Explanation and Elaboration article discusses each checklist item and gives methodological background and published examples of transparent reporting. The STROBE checklist is best used in conjunction with this article (freely available on the Web sites of PLoS Medicine at <http://www.plosmedicine.org/>, Annals of Internal Medicine at <http://www.annals.org/>, and Epidemiology at <http://www.epidem.com/>). Information on the STROBE Initiative is available at [www.strobe-statement.org](http://www.strobe-statement.org).

# BMJ Open

## The prevalence and influence factors of physical activity and sedentary behavior in Chinese rural population: The Henan Rural Cohort Study

|                                 |                                                                                                                                                                                                                                                                                                                                                                                                                                                                                                                                                                                                                                                                                                                                                                                                                                                                                                                                                                                                                                                                                                                                                                                                                                                                                                                               |
|---------------------------------|-------------------------------------------------------------------------------------------------------------------------------------------------------------------------------------------------------------------------------------------------------------------------------------------------------------------------------------------------------------------------------------------------------------------------------------------------------------------------------------------------------------------------------------------------------------------------------------------------------------------------------------------------------------------------------------------------------------------------------------------------------------------------------------------------------------------------------------------------------------------------------------------------------------------------------------------------------------------------------------------------------------------------------------------------------------------------------------------------------------------------------------------------------------------------------------------------------------------------------------------------------------------------------------------------------------------------------|
| Journal:                        | <i>BMJ Open</i>                                                                                                                                                                                                                                                                                                                                                                                                                                                                                                                                                                                                                                                                                                                                                                                                                                                                                                                                                                                                                                                                                                                                                                                                                                                                                                               |
| Manuscript ID                   | bmjopen-2019-029590.R1                                                                                                                                                                                                                                                                                                                                                                                                                                                                                                                                                                                                                                                                                                                                                                                                                                                                                                                                                                                                                                                                                                                                                                                                                                                                                                        |
| Article Type:                   | Research                                                                                                                                                                                                                                                                                                                                                                                                                                                                                                                                                                                                                                                                                                                                                                                                                                                                                                                                                                                                                                                                                                                                                                                                                                                                                                                      |
| Date Submitted by the Author:   | 09-May-2019                                                                                                                                                                                                                                                                                                                                                                                                                                                                                                                                                                                                                                                                                                                                                                                                                                                                                                                                                                                                                                                                                                                                                                                                                                                                                                                   |
| Complete List of Authors:       | Tu, Runqi ; Zhengzhou University, Department of Epidemiology and Biostatistics, College of Public Health<br>Li, Yuqian; Zhengzhou University, Department of Clinical Pharmacology, School of Pharmaceutical Science<br>Shen, Lijun; Henan Provincial People's Hospital, Department of Endocrinology and Metabolism<br>Yuan, HuiJuan; Henan Provincial People's Hospital, Department of Endocrinology and Metabolism<br>Mao, Zhenxing ; Zhengzhou University, Department of Epidemiology and Biostatistics, College of Public Health<br>Liu, Xiaotian; Zhengzhou University, Department of Epidemiology and Biostatistics, College of Public Health<br>Zhang, Haiqing; Zhengzhou University, Department of Epidemiology and Biostatistics, College of Public Health<br>zhang, Liying; Zhengzhou University, Department of Epidemiology and Biostatistics, College of Public Health<br>Li, Ruiying; Zhengzhou University, Department of Epidemiology and Biostatistics, College of Public Health<br>Wang, Yikang; Zhengzhou University, Department of Epidemiology and Biostatistics, College of Public Health<br>Wang, Yuming; Henan Provincial People's Hospital, Department of Endocrinology and Metabolism<br>Wang, Chongjian; Zhengzhou University, Department of Epidemiology and Biostatistics, College of Public Health |
| <b>Primary Subject Heading</b>: | Public health                                                                                                                                                                                                                                                                                                                                                                                                                                                                                                                                                                                                                                                                                                                                                                                                                                                                                                                                                                                                                                                                                                                                                                                                                                                                                                                 |
| Secondary Subject Heading:      | Public health, Epidemiology, Sports and exercise medicine                                                                                                                                                                                                                                                                                                                                                                                                                                                                                                                                                                                                                                                                                                                                                                                                                                                                                                                                                                                                                                                                                                                                                                                                                                                                     |
| Keywords:                       | physical activity, sedentary behaviour, prevalence, rural population                                                                                                                                                                                                                                                                                                                                                                                                                                                                                                                                                                                                                                                                                                                                                                                                                                                                                                                                                                                                                                                                                                                                                                                                                                                          |
|                                 |                                                                                                                                                                                                                                                                                                                                                                                                                                                                                                                                                                                                                                                                                                                                                                                                                                                                                                                                                                                                                                                                                                                                                                                                                                                                                                                               |

SCHOLARONE™  
Manuscripts

**Title:**

**The prevalence and influence factors of physical activity and sedentary behavior in Chinese rural population: The Henan Rural Cohort Study**

**Authors:**

Runqi Tu<sup>a†</sup>, Yuqian Li<sup>b†</sup>, Lijun Shen<sup>c,d</sup>, Huijuan Yuan<sup>c,d</sup>, Zhenxing Mao<sup>a</sup>, Xiaotian Liu<sup>a</sup>, Haiqing Zhang<sup>a</sup>, Liying Zhang<sup>a</sup>, Ruiying Li<sup>a</sup>, Yikang Wang<sup>a</sup>, Yuming Wang<sup>c,d\*</sup>, Chongjian Wang<sup>a\*</sup>

**Authors affiliations:**

<sup>a</sup> Department of Epidemiology and Biostatistics, College of Public Health, Zhengzhou University, Zhengzhou, Henan, *PR* China.

<sup>b</sup> Department of Clinical Pharmacology, School of Pharmaceutical Science, Zhengzhou University, Zhengzhou, Henan, *PR* China.

<sup>c</sup> Department of Endocrinology and Metabolism, Henan Provincial People's Hospital, Zhengzhou, Henan, *PR* China.

<sup>d</sup> Department of Endocrinology and Metabolism, Zhengzhou University People's Hospital, Zhengzhou, Henan, *PR* China.

† Runqi Tu and Yuqian Li contributed equally to this work.

**\* Correspondence author**

Dr. Chongjian Wang & Yuming Wang

Department of Epidemiology and Biostatistics

College of Public Health, Zhengzhou University

100 Kexue Avenue, Zhengzhou, 450001, Henan, *PR* China

Phone: +86 371 67781452;

Fax: +86 371 67781868

E-mail: [tjwcj2005@126.com](mailto:tjwcj2005@126.com) & [henanyuming@sina.com](mailto:henanyuming@sina.com)

For peer review only

1  
2  
3  
4  
5  
6  
7  
8  
9  
10  
11  
12  
13  
14  
15  
16  
17  
18  
19  
20  
21  
22  
23  
24  
25  
26  
27  
28  
29  
30  
31  
32  
33  
34  
35  
36  
37  
38  
39  
40  
41  
42  
43  
44  
45  
46  
47  
48  
49  
50  
51  
52  
53  
54  
55  
56  
57  
58  
59  
60

## Abstract

**Objectives:** The study aimed to estimate prevalence and influencing factors of physical activity and sedentary behaviour in rural areas of China.

**Design:** Cross-sectional study.

**Setting:** A multistage, stratified cluster sampling method was used to obtain samples in the general population of Henan province in China.

**Participants:** 38515 participants aged 18 to 79 years were enrolled from the Henan Rural Cohort Study for the cross-sectional study.

**Main outcome measures:** International Physical Activity Questionnaire (IPAQ) was used to assess the levels of Physical activity and sedentary behavior. Multiple logistic regression analysis was used to calculate odds ratios (ORs) and 95% confidence interval (CI) of potential influencing factors with physical inactivity.

**Results:** The age-standardized prevalence of low physical activity and sitting >7.5 hours per day were 32.74% and 26.88% in the general Chinese rural adults, respectively. Gender differences were: 34.91%, 29.76% for men and 31.75%, 25.16% for women respectively. The prevalence of participants with both low physical activity and sitting >7.5 hours per day was 13.95%. Education  $\geq$  Junior middle school, divorced/widowed/unmarried, 1000RMB > per capita monthly income  $\geq$  500RMB, sitting >7.5 hours per day were negatively associated with low physical activity and being male, heavy smoking, fishery products, vegetables and fruits, moderate and light physical activity were negatively associated with sitting >7.5 hours per day.

**Conclusion:** Physical inactivity and sedentary behaviour were high in rural China. There is an increased need in promoting healthy lifestyle to rural population.

## Clinical Trial Registration

The Henan Rural Cohort study has been registered at Chinese Clinical Trial Register (Registration number: ChiCTR-OOC-15006699). <http://www.chictr.org.cn/showproj.aspx?proj=11375>

**Key words:** physical activity; sedentary behaviour; prevalence; rural population

1  
2  
3  
4  
5  
6  
7  
8  
9  
10  
11  
12  
13  
14  
15  
16  
17  
18  
19  
20  
21  
22  
23  
24  
25  
26  
27  
28  
29  
30  
31  
32  
33  
34  
35  
36  
37  
38  
39  
40  
41  
42  
43  
44  
45  
46  
47  
48  
49  
50  
51  
52  
53  
54  
55  
56  
57  
58  
59  
60

For peer review only

**Strengths and limitations of this study**

- The study was focused on rural population.
- The study was based on a large sample.
- Enough potential confounding variables were included in this study.
- The study were based on a cross-sectional study.
- The questionnaire was a standard version.

## Introduction

Over the past few decades, epidemiologic studies have suggested that physical inactivity or sedentary behaviour (SB) were risk factors for non-communicable diseases (NCDs), such as breast cancer<sup>[1]</sup>, prostate cancer<sup>[2]</sup>, cardiovascular diseases (CVD)<sup>[3]</sup>, stroke<sup>[4]</sup>, type 2 diabetes mellitus (T2DM)<sup>[5]</sup>, and metabolic syndrome<sup>[6]</sup>. Moreover, a study ranging from eastern Mediterranean to western Pacific region showed that more than 5.3 million death would be avoided each year, if the inactive people become active<sup>[7]</sup>. In addition to the burden of disease, physical inactivity and SB also result in the substantial economic burden to patients and society, especially in rural areas with limited resources<sup>[8]</sup>.

The prevalence of physical inactivity was about 31.1% all over the world, and varied by regions. For instance, the prevalence of physical inactivity was 43.3% in USA, while it was just 17.0% in southeast Asia<sup>[9]</sup>. Even in a country, the prevalence of physical inactivity also varies from region to region. In China, the prevalence of physically inactive was 63.1% in Shenzhen<sup>[10]</sup>, and another study in Shanghai showed that only 18.4% of participants met physical activity (PA)<sup>[11]</sup>. Although previous studies had explored the prevalence of physical activity and sedentary behaviour among inhabitants of urban China, there is little evidence in rural areas of China that have undergone rapid socio-economic development<sup>[12]</sup>. Therefore, updating the prevalence and risk factors of physical activity and sedentary behaviour, and then evaluating the levels of physical activity and sedentary behaviour in rural areas of China are necessary to provide important evidence to generate strategy and promote physical activity in the population.

So the objectives of the current study were: (1) to explore the prevalence of physical activity and sedentary behaviour, (2) to investigate potential influencing factors of physical activity and sedentary behaviour.

## Methods

### Settings and participants

This cross-sectional study was carried from 2015 to 2017 in 5 rural regions (Suiping, Yuzhou, Xinxiang, Tongxu, and Yima countries) of Henan province. The participants were permanent



1  
2  
3 residents aged 18-79 years. 744 participants with deficient information about their physical  
4 activity and sitting time were excluded. Ultimately, 38515 participants with completed  
5 questionnaires, anthropometric measurements and blood tests were included in our analysis.  
6  
7  
8  
9

### 10 **Data collection**

11  
12  
13 The detail of the sampling process were previously reported<sup>[13]</sup>. Briefly, A multistage, stratified  
14 cluster sampling method was used. First stage, five rural counties were selected in Henan province  
15 of central, south, north, east, and west. Second stage, one to three rural communities (referred to  
16 as 'townships') in each county were selected. Last stage, all permanent residents who were 18-79  
17 years and signed informed consent were selected as the study sample. The information was  
18 collected by face-to-face interview. The data about general demographic characteristics, and  
19 lifestyles were included in a standard questionnaire. Educational level was classified into primary  
20 school or below and junior middle school or above, marital status into married/cohabitation and  
21 unmarried/divorced/widowed categories. In accordance with the smoking index of the World  
22 Health Organization (WHO)<sup>[14]</sup>, the smoking status were divided into never smoking, light  
23 smoking, moderate smoking, and heavy smoking. According to daily alcohol intake of WHO<sup>[14]</sup>,  
24 drinking was categorized into never drinking, light drinking, moderate drinking, and heavy  
25 drinking. According to Chinese dietary guidelines<sup>[15]</sup>, dietary habits were evaluated from the four  
26 aspects of meat and poultry, fishery products, vegetables and fruits, and soy products. The waist  
27 circumference (WC), by a non-elastic tape to the nearest 0.1 cm, was measured at 1 cm above the  
28 navel in a horizontal plane. Height, using a wall-mounted ruler tape with an insertion buckle at  
29 one end to the nearest 0.1 cm, was measured twice without shoes. Body weight, using mechanical  
30 scale on a level surface to the nearest 0.1 kg, was measured once with the subjects in light clothing  
31 and barefoot<sup>[16]</sup>. Body mass index (BMI) was calculated as weight in kilograms divided by the  
32 square of height in meters.  
33  
34  
35  
36  
37  
38  
39  
40  
41  
42  
43  
44  
45  
46  
47  
48  
49  
50  
51

### 52 **Ethical considerations**

53  
54  
55 The purpose and the importance of the study were explained to the participants. Confidentiality  
56 of the information was maintained throughout the study by excluding personal identifiers from the  
57 data collection form.  
58  
59  
60

## Patient and public involvement

Neither patients nor the public were involved in developing this project.

## Definitions

International Physical Activity Questionnaire (IPAQ) was used to assess the levels of PA<sup>[17]</sup>. All the weekly time of vigorous activity, moderate activity and walking was calculated with the number of Mets in each category and average daily estimated. Mets reflected the energy expenditure specific for vigorous activity, moderate activity and walking. In this study, the Mets of vigorous activity was 8; the Mets of moderate activity was 4; the Mets of walking was 3,3. The value of Mets was estimated by the sum of the three physical activities in one week. The PA categorized into three levels were light (physically inactive), moderate and vigorous<sup>[9,18]</sup>. These categories were based on standard scoring criteria of IPAQ. The vigorous activity should meet either of the following two criteria: (1) vigorous activity was at least 3 days/week and the week of accumulating Mets was at least 1500 MET-minutes/week; or (2) any combination of vigorous activity, moderate activity or walking at least 5 days/week and the accumulating Mets was at least 3000 MET-minutes/week. The moderate activity should meet either of the following four criteria: (1) moderate activity was at least 30 min in 5 days a week; (2) vigorous activity was at least 20 min in 3 days a week; (3) walking at least 30 min a day for 5 or more days a week; (4) the accumulating Mets, of any combination of moderate activity, vigorous activity or walking, was at least 600 MET-minutes/week in 5 or more days a week. the light activity category were for individuals who neither met vigorous nor moderate criteria. And about the SB, the cut-point was set 7.5 hours<sup>[19,20]</sup>.

## Statistical analysis

Continuous variables were presented as mean  $\pm$  standard deviation (SD). Differences between two groups were tested using t-test and more than two group were tested using ANOVA. Categorical variables presented as numbers and percentages were compared using chi-square test. Based on Chinese population data from 2010 census, direct standardization was used to calculate the age-standardized prevalence of Mets. The multinomial logistic regression models were used to

calculate ORs and 95% CI between the potential factors and Mets. All statistical tests were two-tailed, and  $P$  value  $< 0.05$  was considered statistically significant. The data were analyzed using SAS9.1 software package (SAS Institute, USA) and R version 3.5.1.

## Result

### Demographic characteristics.

Table 1 showed the demographic characteristics of the 38515 participants aged from 18 to 79 years old. The mean (standard deviation, SD) age was 55.65(12.14) years. Overall, a total of 11510, 14672 and 12333 subjects were engaged in vigorous, moderate and light physical activity, respectively. Being man, married/cohabiting, the smoking of light, moderate and heavy level and the drinking of light and moderate were more common among vigorous activity participants, while older age, widowed/single/divorced/separated,  $\leq$ Primary school, per capita monthly income  $\leq 500$ RMB, heavy drinking were more prevalent among moderate physical activity participants. Among the 38515 participants, 29270 were sitting  $\leq 7.5$  hours per day. Being women, married/cohabiting,  $\geq$ Junior school, 500RMB  $<$ per capita monthly income  $< 1000$ RMB, never smoking and never drinking were more prevalent in the subjects with sitting  $\leq 7.5$  hours per day than sitting  $> 7.5$  hours per day ( $p < 0.001$ ). Meanwhile, the supplementary table 1 showed the 95%CI of each value.

### The sex-specific distributions of physical activity and sitting time according to age.

Figure 1 describes the sex-specific distribution of the Mets of physical activity and sitting time according to age. The median of Mets for physical activity and sitting time were 7092 MET-minutes/week and 5 h., respectively. The median of Mets for physical activity and sitting time were 6558 MET-minutes/week, 7119 MET-minutes/week and 5 h, 5 h for men and women, respectively. The mean  $\pm$  standard deviation (SD) of Mets for physical activity and sitting time were 7626.02 $\pm$ 4229.32 MET-minutes/week and 5.70 $\pm$ 3.23 h., respectively. The mean  $\pm$  SD of Mets for physical activity and sitting time were 7506.15 $\pm$ 4524.75 MET-minutes/week, 7704.20  $\pm$  4023.12 MET-minutes/week and 5.97  $\pm$  3.39 h, 5.53  $\pm$  3.12 h for men and women ( $P < 0.001$ ), respectively. Notably, the sitting time of the men was higher than women. The 50-59 age group

1  
2  
3  
4 had the highest Mets. The 70-79 age group had the highest sitting time.  
5

#### 6 7 **Prevalence of light physical activity and sitting>7.5 hours per day.**

8  
9 Supplementary table 2 displays the prevalence of light physical activity and sitting>7.5 hours  
10 per day among various characteristics. The prevalence of light physical activity and sitting>7.5  
11 hours per day were 32.02% and 26.60%, and the corresponding age-standardized rates were  
12 32.90% and 26.88%, respectively. Subgroups study showed that the prevalence of low physical  
13 activity and sitting>7.5 hours per day were higher in those who were younger or older, being men,  
14 Widowed/single/divorced/separated with lower per capita monthly income, heavy smoking and  
15 drinking.  
16  
17  
18  
19  
20  
21  
22

#### 23 24 **Changes of light physical activity and sitting>7.5 hours per day in different subgroup.**

25  
26 Figure 2 presents that the age-standardized prevalence of light physical activity and sitting>7.5  
27 hours per day changed with age in both sexes. The prevalence of light physical activity and  
28 sitting>7.5 hours per day decreased with age firstly and then increased. Men had higher  
29 probability of having high physical activity and sitting>7.5 hours per day than women in all the  
30 age groups.  
31  
32  
33  
34  
35  
36

#### 37 38 **The percentage according to the cut-off points of physical activity and sitting time in** 39 **different sexes.**

40  
41 Figure 3 shows the age-standardized percentage according to the cut-off points of physical  
42 activity and sitting time in different sexes. A total of 17346 subjects (7434 men and 9912 women)  
43 had light physical activity or sitting>7.5 hours per day, and the corresponding age-standardized  
44 prevalence was 45.84% (48.99% in men and 43.98% in women). The age-standardized prevalence  
45 of participants with both light physical activity and single sitting>7.5 hours per day was 13.95%  
46 (15.68% in men and 12.93% in women).  
47  
48  
49  
50  
51  
52  
53

#### 54 55 **Analysis of influencing factors.**

56  
57 Table2 describes the odds ratios (*ORs*) of potential influencing factors association with light  
58 physical activity and sitting time >7.5 hours per day. Being women, 18-29 age group, level of  
59  
60

1  
2  
3  
4 education  $\geq$  Junior middle school, divorced/widowed/unmarried, 1000RMB > per capita monthly  
5 income  $\geq$  500 RMB, never smoking and drinking, and sitting time per day were significantly  
6 negatively associated with light physical activity, while being men, level of education  $\leq$  Primary  
7 school, per capita monthly income < 500 RMB, heavy somking and drinking, fishery products,  
8 vegetables and fruits were significantly negatively association with sitting >7.5 hours per day.  
9  
10  
11  
12  
13  
14  
15  
16  
17  
18  
19  
20  
21  
22  
23  
24  
25  
26  
27  
28  
29  
30  
31  
32  
33  
34  
35  
36  
37  
38  
39  
40  
41  
42  
43  
44  
45  
46  
47  
48  
49  
50  
51  
52  
53  
54  
55  
56  
57  
58  
59  
60

For peer review only

## Discussion

New insights of physical activity and sedentary behaviour were provided by the results from this large survey among rural population in Henan of China. Overall, the median levels of sitting time were higher in rural adults of China than the previous study of a 20 country comparison of sitting<sup>[21]</sup>, and the percent levels of physical inactivity were higher in Chinese rural adults than the previous study of global physical activity levels<sup>[9]</sup>. There was an association of decreased physical activity with age firstly and then increased in the prevalence of light physical activity and sitting>7.5 hours per day. The percent individuals that had both light physical activity and sitting>7.5 hours per day were 15.68%, 12.93% and 13.95% in men, women and total, respectively. Further analysis of multiple logistic regression presented that gender, age, the level of education, marital status, smoking, drinking and vegetables intake were influencing factors for light physical activity and sitting>7.5 hours.

Previous studies had shown that the levels of physical inactivity and sedentary was high in urban China<sup>[10,11]</sup>. Compared with those in urban area, the levels of physical inactivity and sedentary was relatively low in rural area of China. This gap between the urban and rural might be explained by the more use of intelligent technology for urban construction, with the social progress, scientific and economic development. The mean of Mets increased with age firstly and then at the age group of 50-59 decreased. While the sitting time was highest in 70-79 age group. It is likely that the decline in physical ability with age limits the physical activity and increase the sedentary nature of the elderly<sup>[22]</sup>. Furthermore, the aged might fear injuries, which was another reason to lead them into physical inactivity<sup>[23]</sup>. About physical activity, the subgroup analysis showed that under the various characteristics, the prevalence of vigorous physical activity was about 30%, moderate physical activity was about 40% and the light physical activity was about 30%. While about sitting time, under all the various characteristics, the sitting time $\leq$ 7.5 hours per day was about 70%. These results were similar to a Chilean study<sup>[23]</sup>.

The results of co-existence of physical activity and sedentary behavior showed that light physical activity and sitting time>7.5 hours per day was 15.68%, 12.93% and 13.95% in men,

1  
2  
3  
4 women and total, respectively. It was similar with a study from Japan<sup>[24]</sup>. For these participants  
5  
6 who were light physical activity and sitting time >7.5 hours per day, should take a measure to  
7  
8 promote the physical activity.  
9

10 Evidence showed that there were negative relationships between junior middle school or above,  
11  
12 divorced/widowed/unmarried, per capita monthly income  $\geq 500$  RMB and meat and poultry  
13  
14 consumption with moderate physical activity. Having a junior middle school or above,  
15  
16 divorced/widowed/unmarried, 1000RMB > per capita monthly income  $\geq 500$  RMB, and sitting  
17  
18 time per day >7.5 hours were negative association with light physical activity. For sitting >7.5  
19  
20 hours per day, the negative factors were being men, divorced/widowed/unmarried, heavy  
21  
22 smoking, Fishery products and vegetable and fruits intake.  
23

24  
25 The current study focused on the epidemiologic characteristics of physical activity and  
26  
27 sedentary behaviour based on a relatively large sample size of rural population in Henan of China.  
28  
29 Although a series of measures, such as standardized tools and training implementation, had been  
30  
31 done to guarantee the authenticity, there were several limitations. First of all, these results were  
32  
33 based on a cross-sectional study, so the causal relationships between factors and physical activity  
34  
35 or sedentary behaviour could not be confirmed. Second, the responses were from self-reported  
36  
37 data, which could distort real facts. Third, according to the actual rural circumstances, the  
38  
39 residents who studied or worked in cities were not included in this study, so the prevalence of  
40  
41 Mets might be over or under estimated in rural population. Although these limitations existed in  
42  
43 the study, the relatively large epidemiological study also could reflect the prevalence of physical  
44  
45 activity and sedentary behaviour in rural areas of China.  
46

## 47 **Conclusion**

48  
49 This study suggests relatively higher prevalence of physical inactivity among Chinese rural  
50  
51 adults has emerged with economic and social transition. More attention should be given to the  
52  
53 aged, and drinking individuals who are at high risk of physical inactivity.  
54  
55

## 56 **Acknowledgements**

57  
58  
59 The authors thank all of the participants, coordinators, and administrators for their support and  
60

1  
2  
3  
4 help during the research. In addition, the authors would like to thank Dr. Tanko Abdulai for his  
5  
6 critical reading of the manuscript.  
7

### 8 **Ethics approval and consent to participate**

9  
10  
11 Ethics approval was obtained from the “Zhengzhou University Life Science Ethics Committee”,  
12  
13 and written informed consent was obtained for all participants. Ethic approval code: [2015] MEC  
14  
15 (S128).  
16

17  
18 The purpose and the importance of the study were explained to the participants. Information  
19  
20 confidentiality was maintained throughout the study by excluding personal identifiers from the  
21  
22 data collection form.  
23

### 24 **Consent for publication**

25  
26  
27 All authors consent for publication  
28

### 29 **Conflict of interest**

30  
31  
32 The authors declared no conflict of interest associated with this manuscript.  
33  
34

### 35 **Funding**

36  
37  
38 This research was supported by the National Key Research and Development Program  
39  
40 Precision Medicine Initiative of China (Grant NO: 2016YFC0900803), National Natural Science  
41  
42 Foundation of China (Grant NO: 81573243, 81602925), Henan Science and Technology  
43  
44 Development Funds (Grant NO: 182207310001), Henan Natural Science Foundation (Grant NO:  
45  
46 182300410293), Science and Technology Foundation for Innovation Talent of Henan Province  
47  
48 (Grant NO: 164100510021), Science and Technology Innovation Talents Support Plan of Henan  
49  
50 Province Colleges and Universities (Grant NO: 14HASTIT035). The funders had no role in the  
51  
52 study design, data collection and analysis, decision to publish, or preparation of the manuscript.  
53

### 54 **Data sharing statement**

55  
56  
57 All relevant data are within the paper and its Supporting Information files. Contact to Dr.  
58  
59 Chongjian Wang (tjwcj2005@126.com) for additional information regarding data access.  
60



## Author Contributions

C.J.W. and Y.M.W. conceived and designed the study. R.Q.T., Y.L.Q., L.J.S., H.J.Y., Z.X.M., X.T.L., H.Q.Z., L.Y.Z., R.Y.L., and Y.K.W. coordinated data collection. Y.L.Q., L.J.S., H.J.Y., Z.X.M., X.T.L., H.Q.Z., L.Y.Z., R.Y.L., and Y.K.W. conducted the analyses. R.Q.T. wrote the manuscript. All co-authors critically revised the manuscript. All authors have approved the final manuscript.

## Reference

- [1] Fararouei M, Iqbal A, Rezaian S, Gheibi Z, Dianatinasab A, Shakarami S, Dianatinasab M. Dietary Habits and Physical Activity are Associated With the Risk of Breast Cancer Among Young Iranian Women: A Case-control Study on 1010 Premenopausal Women. *Clin Breast Cancer*. 2018 Nov 2. pii: S1526-8209(18)30622-0.
- [2] Sormunen J, Talibov M, Sparén P, Martinsen JI, Weiderpass E, Pukkala E. Perceived Physical Strain at Work and Incidence of Prostate Cancer – a Case-Control Study in Sweden and Finland. *Asian Pac J Cancer Prev*. 2018 Aug 24;19(8):2331-2335.
- [3] Ambakederemo TE, Chikezie EU. Assessment of some traditional cardiovascular risk factors in medical doctors in Southern Nigeria. *Vasc Health Risk Manag*. 2018 Oct 24;14:299-309.
- [4] Sarfo FS, Mobula LM, Plange-Rhule J, Ansong D, Ofori-Adjei D. Incident stroke among Ghanaians with hypertension and diabetes: A multicenter, prospective cohort study. *J Neurol Sci*. 2018 Dec 15;395:17-24.
- [5] Chang C, Khurana S, Strodel R, Camp A, Magenheimer E, Hawley N. Perceived Barriers to Physical Activity Among Low-Income Latina Women at Risk for Type 2 Diabetes. *Diabetes Educ*. 2018 Oct;44(5):444-453.
- [6] El Bilbeisi AH, Hosseini S, Djafarian K. The Association between Physical Activity and the Metabolic Syndrome among Type 2 Diabetes Patients in Gaza Strip, Palestine. *Ethiop J Health Sci*. 2017 May;27(3):273-282.
- [7] Lee IM, Shiroma EJ, Lobelo F, Puska P, Blair SN, Katzmarzyk PT; Lancet Physical Activity

1  
2  
3  
4 Series Working Group. Effect of physical inactivity on major non-communicable diseases  
5 worldwide: an analysis of burden of disease and life expectancy. *Lancet*. 2012 Jul 21;  
6 380(9838):219-29.  
7  
8

9  
10 [8] Ding D, Lawson KD, Kolbe-Alexander TL, Finkelstein EA, Katzmarzyk PT, van Mechelen  
11 W, Pratt M; Lancet Physical Activity Series 2 Executive Committee. The economic burden of  
12 physical inactivity: a global analysis of major non-communicable diseases. *Lancet*. 2016 Sep  
13 24;388(10051):1311-24.  
14  
15

16  
17 [9] Hallal PC, Andersen LB, Bull FC, Guthold R, Haskell W, Ekelund U; Lancet Physical Activity  
18 Series Working Group. Global physical activity levels: surveillance progress, pitfalls, and  
19 prospects. *Lancet*. 2012 Jul 21;380(9838):247-57.  
20  
21

22  
23 [10] Zhou Y, Wu J, Zhang S, Yan S, He L, Mkandawire N, Song X, Gan Y, Li W, Yang T, Li J,  
24 Zeng X, Wang Z, Lu Z. Prevalence and risk factors of physical inactivity among middle-aged and  
25 older Chinese in Shenzhen: a cross-sectional study. *BMJ Open*. 2018 Oct 15;8(10):e019775.  
26  
27

28  
29 [11] Chen ST, Liu Y, Hong JT, Tang Y, Cao ZB, Zhuang J, Zhu Z, Chen PJ. Co-existence of  
30 physical activity and sedentary behavior among children and adolescents in Shanghai, China: do  
31 gender and age matter? *BMC Public Health*. 2018 Nov 22;18(1):1287.  
32  
33

34  
35 [12] Ding C, Song C, Yuan F, Zhang Y, Feng G, Chen Z, Liu A. The Physical Activity Patterns  
36 among Rural Chinese Adults: Data from China National Nutrition and Health Survey in  
37 2010~2012. *Int J Environ Res Public Health*. 2018 May 9;15(5).  
38  
39

40  
41 [13] Liu X, Mao Z, Li Y, Wu W, Zhang X, Huo W, Yu S, Shen L, Li L, Tu R, Wu H, Li H, He M,  
42 Liu L, Wei S, Li W, Wu T, Wang C. The Henan Rural Cohort: a prospective study of chronic non-  
43 communicable diseases. *Int J Epidemiol*. 2019 Mar 26.  
44  
45

46  
47 [14].Ediriweera BR TS, Sir RD, Robin R, International guide for monitoring alcohol consumption  
48 and related harm (ed. World Health Organization), Geneva. 51 (2000).  
49  
50

51  
52 [15] Chinese Nutrition Society (2011) The dietary guidelines for Chinese residents. The Tibet  
53 people's Publishing House: Lhasa pp 97, 197, 198.  
54  
55  
56  
57  
58  
59  
60

1  
2  
3  
4 [16] People's Republic of China Ministry of Health Disease Control Division. Overweight and  
5 Obesity Prevention and Control Guidelines in Chinese Adults, People's Republic of China  
6 Ministry of Health Disease Control Division, Beijing, China, 2003 (Chinese).  
7  
8  
9

10 [17] Bennie JA, Chau JY, van der Ploeg HP, Stamatakis E, Do A, Bauman A. The prevalence and  
11 correlates of sitting in European adults - a comparison of 32 Eurobarometer-participating  
12 countries. *Int J Behav Nutr Phys Act*. 2013 Sep 11;10:107. doi: 10.1186/1479-5868-10-107  
13  
14  
15

16 [18]. Bauman A, Bull F, Chey T, Craig CL, Ainsworth BE, Sallis JF, Bowles HR, Hagstromer M,  
17 Sjoström M, Pratt M; IPS Group. The International Prevalence Study on Physical Activity: results  
18 from 20 countries. *Int J Behav Nutr Phys Act*. 2009 Mar 31;6:21.  
19  
20  
21  
22

23 [19]. Lakerveld J, Loyen A, Schotman N, Peeters CFW, Cardon G, van der Ploeg HP, Lien N,  
24 Chastin S, Brug J. Sitting too much: A hierarchy of socio-demographic correlates. *Prev Med*. 2017  
25 Aug;101:77-83. doi: 10.1016/j.ypmed.2017.05.015.  
26  
27  
28  
29

30 [20]. Milton K, Gale J, Stamatakis E, Bauman A. Trends in prolonged sitting time among European  
31 adults: 27 country analysis. *Prev Med*. 2015 Aug;77:11-6. doi:10.1016/j.ypmed.2015.04.016.  
32  
33  
34

35 [21] Bauman A, Ainsworth BE, Sallis JF, Hagströmer M, Craig CL, Bull FC, Pratt M, Venugopal  
36 K, Chau J, Sjöström M; IPS Group. The descriptive epidemiology of sitting. A 20-country  
37 comparison using the International Physical Activity Questionnaire (IPAQ). *Am J Prev Med*. 2011  
38 Aug;41(2):228-35.  
39  
40  
41  
42

43 [22] Crespo CJ, Smit E, Andersen RE, Carter-Pokras O, Ainsworth BE. Race/ethnicity, social  
44 class and their relation to physical inactivity during leisure time: results from the Third National  
45 Health and Nutrition Examination Survey, 1988-1994. *Am J Prev Med*. 2000 Jan;18(1):46-53.  
46  
47  
48  
49

50 [23] Celis-Morales C, Salas C, Alduhishy A, Sanzana R, Martínez MA, Leiva A, Diaz X,  
51 Martínez C, Álvarez C, Leppe J, Munro CA, Siervo M, Willis ND. Socio-demographic patterns of  
52 physical activity and sedentary behaviour in Chile: results from the National Health Survey 2009-  
53 2010. *J Public Health (Oxf)*. 2016 Jun;38(2):e98-e105.  
54  
55  
56  
57

58 [24] Liao Y, Shibata A, Ishii K, Oka K. Independent and Combined Associations of Physical  
59  
60

1  
2  
3  
4 Activity and Sedentary Behavior with Depressive Symptoms Among Japanese Adults. Int J Behav  
5  
6 Med. 2016 Aug;23(4):402-9.  
7  
8  
9  
10  
11  
12  
13  
14  
15  
16  
17  
18  
19  
20  
21  
22  
23  
24  
25  
26  
27  
28  
29  
30  
31  
32  
33  
34  
35  
36  
37  
38  
39  
40  
41  
42  
43  
44  
45  
46  
47  
48  
49  
50  
51  
52  
53  
54  
55  
56  
57  
58  
59  
60

For peer review only

**Table 1. Demographic characteristics of the participants**

| Variable                          | Overall<br>(N=38515) | Physical activity     |                       |                    | <i>P</i> | Sitting time per day    |                         | <i>P</i> |
|-----------------------------------|----------------------|-----------------------|-----------------------|--------------------|----------|-------------------------|-------------------------|----------|
|                                   |                      | Vigorous<br>(N=11510) | Moderate<br>(N=14672) | Light<br>(N=12333) |          | ≤7.5 hours<br>(N=28270) | >7.5 hours<br>(N=10245) |          |
| Age(years), mean±SD               | 55.65±12.14          | 55.48±10.81           | 54.62±12.05           | 57.02±13.25        | <0.001   | 55.46±11.93             | 56.17±12.68             | <0.001   |
| Sex, n (%)                        |                      |                       |                       |                    | <0.001   |                         |                         | <0.001   |
| Women                             | 23331(60.52)         | 5963(51.81)           | 10402(70.90)          | 6945(56.31)        |          | 17588(62.21)            | 5722(55.85)             |          |
| Men                               | 15205(39.48)         | 5547(48.19)           | 4270(29.10)           | 5388(43.69)        |          | 10682(37.79)            | 4523(44.15)             |          |
| Marital status, n (%)             |                      |                       |                       |                    | <0.001   |                         |                         | <0.001   |
| Married/cohabiting                | 34571(89.76)         | 10567(91.81)          | 13231(90.18)          | 10773(87.35)       |          | 25502(90.20)            | 9069(88.50)             |          |
| Widowed/single/divorced/separated | 3944(10.24)          | 943(8.19)             | 1441(9.82)            | 1560(12.65)        |          | 2768(9.80)              | 1176(11.50)             |          |
| Education, n (%)                  |                      |                       |                       |                    | 0.234    |                         |                         | 0.001    |
| ≤Primary school                   | 17277(44.86)         | 5149(44.74)           | 6521(44.45)           | 5607(45.46)        |          | 12533(44.33)            | 4744(46.31)             |          |
| ≥Junior school                    | 21238(55.14)         | 6361(55.26)           | 8151(55.55)           | 6726(54.54)        |          | 15737(55.67)            | 5501(53.69)             |          |

|    |                                  |              |             |              |             |              |             |
|----|----------------------------------|--------------|-------------|--------------|-------------|--------------|-------------|
| 1  |                                  |              |             |              |             |              |             |
| 2  |                                  |              |             |              |             |              |             |
| 3  |                                  |              |             |              |             |              |             |
| 4  |                                  |              |             |              |             |              |             |
| 5  | Per capita monthly income, n (%) |              |             |              |             | <0.001       | <0.001      |
| 6  |                                  |              |             |              |             |              |             |
| 7  | ≤500RMB                          | 13746(35.69) | 4169(36.22) | 4841(32.99)  | 4736(38.40) | 9812(34.71)  | 3934(38.40) |
| 8  |                                  |              |             |              |             |              |             |
| 9  | 500RMB~                          | 12657(32.86) | 3724(32.35) | 4959(33.80)  | 3974(32.22) | 9720(34.38)  | 2937(28.67) |
| 10 |                                  |              |             |              |             |              |             |
| 11 | ≥1000RMB                         | 12112(31.45) | 3617(31.42) | 4872(33.21)  | 3623(29.38) | 8738(30.91)  | 3374(32.93) |
| 12 |                                  |              |             |              |             |              |             |
| 13 |                                  |              |             |              |             |              |             |
| 14 | Smoking, n (%)                   |              |             |              |             | <0.001       | <0.001      |
| 15 |                                  |              |             |              |             |              |             |
| 16 | Never                            | 28023(72.76) | 7652(66.48) | 11768(80.21) | 8603(69.76) | 20929(74.03) | 7094(69.24) |
| 17 |                                  |              |             |              |             |              |             |
| 18 | Light                            | 2152(5.59)   | 786(6.83)   | 625(4.26)    | 741(6.01)   | 1599(5.66)   | 553(5.40)   |
| 19 |                                  |              |             |              |             |              |             |
| 20 | Moderate                         | 1750(4.54)   | 632(5.49)   | 505(3.44)    | 613(4.97)   | 1252(4.43)   | 498(4.86)   |
| 21 |                                  |              |             |              |             |              |             |
| 22 | Heavy                            | 6590(17.11)  | 2440(21.20) | 1774(12.09)  | 2376(19.27) | 4490(15.88)  | 2100(20.50) |
| 23 |                                  |              |             |              |             |              |             |
| 24 |                                  |              |             |              |             |              |             |
| 25 |                                  |              |             |              |             |              |             |
| 26 | Drinking, n (%)                  |              |             |              |             | <0.001       | <0.001      |
| 27 |                                  |              |             |              |             |              |             |
| 28 | Never                            | 29833(77.46) | 8257(71.74) | 12223(83.31) | 9353(75.84) | 22068(78.06) | 7765(75.79) |
| 29 |                                  |              |             |              |             |              |             |
| 30 | Light                            | 5360(13.92)  | 2065(17.94) | 1525(10.39)  | 1770(14.35) | 3840(13.58)  | 1520(14.84) |
| 31 |                                  |              |             |              |             |              |             |
| 32 | Moderate                         | 1820(4.73)   | 668(5.80)   | 534(3.64)    | 618(5.01)   | 1351(4.78)   | 469(4.58)   |
| 33 |                                  |              |             |              |             |              |             |
| 34 | Heavy                            | 1502(3.90)   | 520(4.52)   | 390(2.66)    | 592(4.80)   | 1011(3.58)   | 491(4.79)   |
| 35 |                                  |              |             |              |             |              |             |
| 36 |                                  |              |             |              |             |              |             |
| 37 |                                  |              |             |              |             |              |             |
| 38 |                                  |              |             |              |             |              |             |
| 39 |                                  |              |             |              |             |              |             |
| 40 |                                  |              |             |              |             |              |             |
| 41 |                                  |              |             |              |             |              |             |
| 42 |                                  |              |             |              |             |              |             |
| 43 |                                  |              |             |              |             |              |             |
| 44 |                                  |              |             |              |             |              |             |
| 45 |                                  |              |             |              |             |              |             |
| 46 |                                  |              |             |              |             |              |             |

Dietary habits (Kg/Month), (mean  $\pm$  SD)

|                                        |                   |                   |                   |                   |        |                   |                   |        |
|----------------------------------------|-------------------|-------------------|-------------------|-------------------|--------|-------------------|-------------------|--------|
| Meat and poultry                       | 1.32 $\pm$ 1.32   | 1.21 $\pm$ 1.28   | 1.40 $\pm$ 1.35   | 1.33 $\pm$ 1.33   | <0.001 | 1.31 $\pm$ 1.33   | 1.34 $\pm$ 1.31   | 0.410  |
| Fishery products                       | 0.11 $\pm$ 0.16   | 0.10 $\pm$ 0.15   | 0.12 $\pm$ 0.16   | 0.11 $\pm$ 0.16   | <0.001 | 0.11 $\pm$ 0.16   | 0.13 $\pm$ 0.17   | <0.001 |
| Vegetables and fruits                  | 13.8 $\pm$ 7.47   | 12.49 $\pm$ 7.43  | 14.68 $\pm$ 7.37  | 14.07 $\pm$ 7.44  | <0.001 | 13.27 $\pm$ 7.23  | 15.24 $\pm$ 7.91  | <0.001 |
| Soy products                           | 0.48 $\pm$ 0.64   | 0.41 $\pm$ 0.60   | 0.49 $\pm$ 0.65   | 0.53 $\pm$ 0.67   | <0.001 | 0.49 $\pm$ 0.65   | 0.46 $\pm$ 0.63   | <0.001 |
| Height(cm), mean $\pm$ SD              | 159.69 $\pm$ 8.20 | 160.65 $\pm$ 8.24 | 158.62 $\pm$ 7.84 | 160.07 $\pm$ 8.43 | <0.001 | 159.59 $\pm$ 8.17 | 159.98 $\pm$ 8.28 | <0.001 |
| Weight(kg), mean $\pm$ SD              | 63.48 $\pm$ 11.14 | 63.92 $\pm$ 10.86 | 62.44 $\pm$ 10.76 | 64.30 $\pm$ 11.72 | <0.001 | 63.60 $\pm$ 11.09 | 63.15 $\pm$ 11.27 | <0.001 |
| BMI(kg/m <sup>2</sup> ), mean $\pm$ SD | 24.84 $\pm$ 3.57  | 24.72 $\pm$ 3.46  | 24.77 $\pm$ 3.50  | 25.03 $\pm$ 3.73  | <0.001 | 24.92 $\pm$ 3.56  | 24.61 $\pm$ 3.59  | <0.001 |
| WC(cm), mean $\pm$ SD                  | 84.07 $\pm$ 10.41 | 83.65 $\pm$ 10.03 | 83.44 $\pm$ 10.19 | 85.22 $\pm$ 10.90 | <0.001 | 84.42 $\pm$ 10.35 | 83.10 $\pm$ 10.50 | <0.001 |

**Table 2. Association of potential risk factors for physical activity and sitting time.**

| Factors   | OR(95% CI)            |                       |                    |                    |                         |                         |
|-----------|-----------------------|-----------------------|--------------------|--------------------|-------------------------|-------------------------|
|           | Physical activity     |                       |                    |                    | Sitting time per day    |                         |
|           | Moderate <sup>a</sup> | Moderate <sup>b</sup> | Light <sup>a</sup> | Light <sup>b</sup> | >7.5 hours <sup>a</sup> | >7.5 hours <sup>b</sup> |
| Age(year) |                       |                       |                    |                    |                         |                         |
| 18-       | 1.00                  | 1.00                  | 1.00               | 1.00               | 1.00                    | 1.00                    |
| 30-       | 0.67(0.56,0.81)       | 0.70(0.58,0.85)       | 0.58(0.48,0.70)    | 0.63(0.51,0.76)    | 0.99(0.85,1.14)         | 1.04(0.89,1.22)         |
| 40-       | 0.49(0.41,0.57)       | 0.52(0.44,0.62)       | 0.42(0.36,0.50)    | 0.47(0.39,0.56)    | 0.91(0.79,1.04)         | 0.98(0.85,1.13)         |
| 50-       | 0.48(0.41,0.57)       | 0.52(0.44,0.61)       | 0.36(0.30,0.42)    | 0.39(0.33,0.47)    | 0.87(0.76,0.99)         | 0.94(0.82,1.09)         |
| 60-       | 0.45(0.38,0.52)       | 0.51(0.43,0.61)       | 0.46(0.39,0.54)    | 0.51(0.43,0.62)    | 0.89(0.78,1.02)         | 0.89(0.77,1.02)         |
| 70-79     | 0.62(0.52,0.74)       | 0.72(0.60,0.87)       | 1.13(0.95,1.35)    | 1.17(0.97,1.42)    | 1.34(1.17,1.54)         | 1.08(0.93,1.26)         |
| Gender    |                       |                       |                    |                    |                         |                         |
| Women     | 1.00                  | 1.00                  | 1.00               | 1.00               | 1.00                    | 1.00                    |
| Men       | 0.44(0.42,0.46)       | 0.46(0.43,0.50)       | 0.83(0.79,0.88)    | 0.76(0.70,0.83)    | 1.30(1.24,1.36)         | 1.25(1.16,1.35)         |



1  
2  
3  
4  
5  
6  
7  
8  
9  
10  
11  
12  
13  
14  
15  
16  
17  
18  
19  
20  
21  
22  
23  
24  
25  
26  
27  
28  
29  
30  
31  
32  
33  
34  
35  
36  
37  
38  
39  
40  
41  
42  
43  
44  
45  
46

|                            |                 |                 |                 |                 |                 |                 |
|----------------------------|-----------------|-----------------|-----------------|-----------------|-----------------|-----------------|
| Education                  |                 |                 |                 |                 |                 |                 |
| ≤Primary school            | 1.00            | 1.00            | 1.00            | 1.00            | 1.00            | 1.00            |
| ≥Junior middle school      | 1.01(0.96,1.06) | 1.07(1.01,1.14) | 0.97(0.92,1.02) | 1.27(1.20,1.35) | 0.92(0.88,0.97) | 0.85(0.81,0.90) |
| Marital status             |                 |                 |                 |                 |                 |                 |
| Married/cohabiting         | 1.00            | 1.00            | 1.00            | 1.00            | 1.00            | 1.00            |
| Divorced/widowed/unmarried | 1.22(1.12,1.33) | 1.15(1.05,1.26) | 1.62(1.49,1.77) | 1.19(1.09,1.31) | 1.20(1.11,1.28) | 1.08(1.00,1.17) |
| Per capita monthly income  |                 |                 |                 |                 |                 |                 |
| <500 RMB                   | 1.00            | 1.00            | 1.00            | 1.00            | 1.00            | 1.00            |
| 500RMB-                    | 1.15(1.08,1.22) | 1.16(1.09,1.23) | 0.94(0.88,1.00) | 1.08(1.01,1.15) | 0.75(0.71,0.80) | 0.79(0.75,0.84) |
| ≥1000 RMB                  | 1.16(1.09,1.23) | 1.13(1.06,1.21) | 0.88(0.83,0.94) | 1.00(0.93,1.07) | 0.96(0.91,1.02) | 1.01(0.95,1.07) |
| Smoking                    |                 |                 |                 |                 |                 |                 |
| Never                      | 1.00            | 1.00            | 1.00            | 1.00            | 1.00            | 1.00            |
| Light                      | 0.52(0.46,0.58) | 0.57(0.51,0.64) | 0.84(0.75,0.93) | 0.79(0.70,0.89) | 1.04(0.93,1.16) | 0.88(0.78,0.99) |
| Moderate                   | 0.52(0.46,0.59) | 0.61(0.54,0.69) | 0.86(0.77,0.97) | 0.85(0.75,0.97) | 1.21(1.07,1.36) | 1.02(0.90,1.16) |

|    |                       |                 |                 |                 |                 |                 |                 |
|----|-----------------------|-----------------|-----------------|-----------------|-----------------|-----------------|-----------------|
| 1  |                       |                 |                 |                 |                 |                 |                 |
| 2  |                       |                 |                 |                 |                 |                 |                 |
| 3  |                       |                 |                 |                 |                 |                 |                 |
| 4  |                       |                 |                 |                 |                 |                 |                 |
| 5  | Heavy                 | 0.47(0.44,0.51) | 0.57(0.52,0.61) | 0.87(0.81,0.92) | 0.83(0.77,0.90) | 1.41(1.33,1.51) | 1.20(1.10,1.31) |
| 6  |                       |                 |                 |                 |                 |                 |                 |
| 7  | Drinking,             |                 |                 |                 |                 |                 |                 |
| 8  |                       |                 |                 |                 |                 |                 |                 |
| 9  | Never                 | 1.00            | 1.00            | 1.00            | 1.00            | 1.00            | 1.00            |
| 10 |                       |                 |                 |                 |                 |                 |                 |
| 11 | Light                 | 0.50(0.46,0.54) | 0.64(0.59,0.69) | 0.76(0.71,0.81) | 0.80(0.74,0.87) | 1.19(1.10,1.28) | 0.98(0.90,1.06) |
| 12 |                       |                 |                 |                 |                 |                 |                 |
| 13 | Moderate              | 0.54(0.48,0.61) | 0.71(0.63,0.81) | 0.82(0.73,0.91) | 0.93(0.82,1.05) | 1.08(0.96,1.22) | 0.82(0.72,0.92) |
| 14 |                       |                 |                 |                 |                 |                 |                 |
| 15 | Heavy                 | 0.51(0.44,0.58) | 0.70(0.61,0.81) | 1.01(0.89,1.13) | 1.10(0.96,1.27) | 1.31(1.16,1.48) | 1.06(0.93,1.21) |
| 16 |                       |                 |                 |                 |                 |                 |                 |
| 17 |                       |                 |                 |                 |                 |                 |                 |
| 18 |                       |                 |                 |                 |                 |                 |                 |
| 19 | Dietary habits        |                 |                 |                 |                 |                 |                 |
| 20 |                       |                 |                 |                 |                 |                 |                 |
| 21 | Meat and poultry      | 1.04(1.02,1.06) | 1.08(1.06,1.10) | 0.93(0.91,0.95) | 1.01(0.99,1.04) | 1.01(0.99,1.03) | 0.95(0.93,0.97) |
| 22 |                       |                 |                 |                 |                 |                 |                 |
| 23 | Fishery products      | 1.16(0.99,1.34) | 0.97(0.82,1.16) | 0.61(0.52,0.72) | 0.76(0.63,0.93) | 2.16(1.86,2.52) | 2.21(1.87,2.60) |
| 24 |                       |                 |                 |                 |                 |                 |                 |
| 25 | Vegetables and fruits | 1.01(1.01,1.01) | 1.01(1.00,1.01) | 0.97(0.97,0.97) | 0.96(0.96,0.97) | 1.04(1.03,1.04) | 1.05(1.04,1.05) |
| 26 |                       |                 |                 |                 |                 |                 |                 |
| 27 | Soy products          | 0.91(0.88,0.94) | 0.88(0.85,0.92) | 0.74(0.71,0.77) | 0.81(0.78,0.85) | 0.91(0.87,0.95) | 0.91(0.88,0.95) |
| 28 |                       |                 |                 |                 |                 |                 |                 |
| 29 |                       |                 |                 |                 |                 |                 |                 |
| 30 | Sitting time per day  |                 |                 |                 |                 |                 |                 |
| 31 |                       |                 |                 |                 |                 |                 |                 |
| 32 | ≤7.5 hours            | 1.00            | 1.00            | 1.00            | 1.00            | -               | -               |
| 33 |                       |                 |                 |                 |                 |                 |                 |
| 34 | >7.5 hours            | 1.34(1.25,1.42) | 1.35(1.27,1.44) | 3.68(3.47,3.91) | 4.09(3.84,4.36) | -               | -               |
| 35 |                       |                 |                 |                 |                 |                 |                 |
| 36 |                       |                 |                 |                 |                 |                 |                 |
| 37 |                       |                 |                 |                 |                 |                 |                 |
| 38 |                       |                 |                 |                 |                 |                 |                 |
| 39 |                       |                 |                 |                 |                 |                 |                 |
| 40 |                       |                 |                 |                 |                 |                 |                 |
| 41 |                       |                 |                 |                 |                 |                 |                 |
| 42 |                       |                 |                 |                 |                 |                 |                 |
| 43 |                       |                 |                 |                 |                 |                 |                 |
| 44 |                       |                 |                 |                 |                 |                 |                 |
| 45 |                       |                 |                 |                 |                 |                 |                 |
| 46 |                       |                 |                 |                 |                 |                 |                 |

1  
2  
3  
4  
5  
6  
7  
8  
9  
10  
11  
12  
13  
14  
15  
16  
17  
18  
19  
20  
21  
22  
23  
24  
25  
26  
27  
28  
29  
30  
31  
32  
33  
34  
35  
36  
37  
38  
39  
40  
41  
42  
43  
44  
45  
46

|                   |   |   |   |   |                 |                 |
|-------------------|---|---|---|---|-----------------|-----------------|
| Physical activity |   |   |   |   |                 |                 |
| Vigorous          | - | - | - | - | 1.00            | 1.00            |
| Moderate          | - | - | - | - | 1.34(1.25,1.42) | 1.37(1.28,1.46) |
| Light             | - | - | - | - | 3.68(3.47,3.91) | 4.08(3.83,4.34) |

---

<sup>a</sup>was a crude model; <sup>b</sup>was a full model.

For peer review only

## Figure Legends

**Figure 1.** The violin chart of metabolic equivalence per week and sitting time per day according to gender and age. (a) is for metabolic equivalence per week; (b) is sitting time per day.

**Figure 2.** Changes in the age-standardized prevalence of physical activity and sitting time with aging in different gender. (a) is for light physical activity; (b) is for moderate physical activity; (c) is for vigorous physical activity. (d) is sitting time  $\leq 7.5$  hours per day; (e) is sitting time  $> 7.5$  hours per day.

**Figure 3.** The age-standardized percentage according to the cut-off points of physical activity and sitting time in different gender. (a) is for total; (b) is for men; (c) is for women.

1  
2  
3  
4  
5  
6  
7  
8  
9  
10  
11  
12  
13  
14  
15  
16  
17  
18  
19  
20  
21  
22  
23  
24  
25  
26  
27  
28  
29  
30  
31  
32  
33  
34  
35  
36  
37  
38  
39  
40  
41  
42  
43  
44  
45  
46  
47  
48  
49  
50  
51  
52  
53  
54  
55  
56  
57  
58  
59  
60

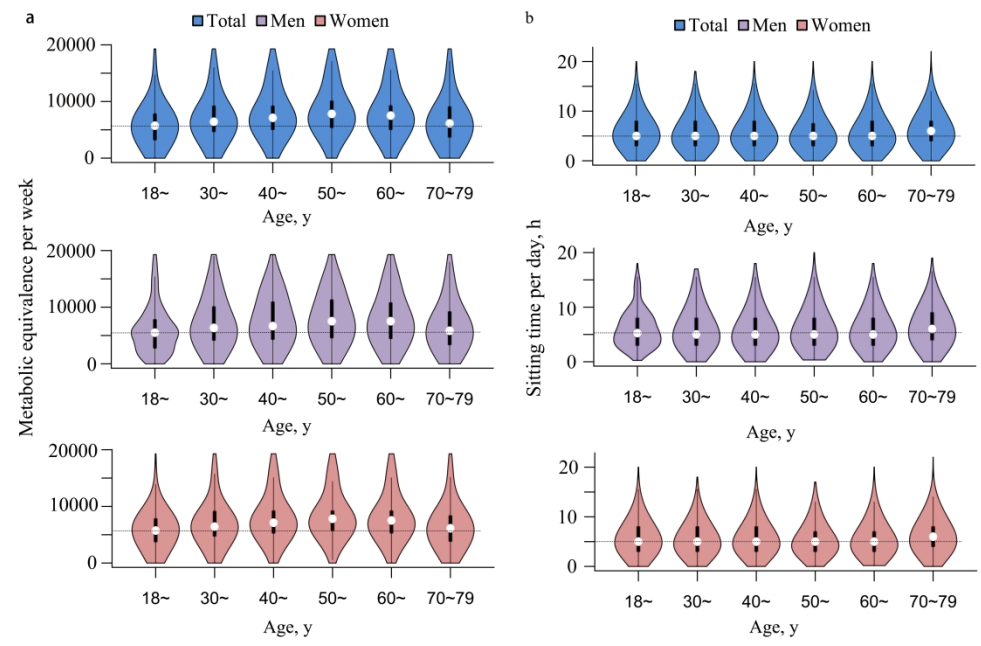

Figure 1. The violin chart of metabolic equivalence per week and sitting time per day according to gender and age. (a) is for metabolic equivalence per week; (b) is sitting time per day.

247x161mm (600 x 600 DPI)

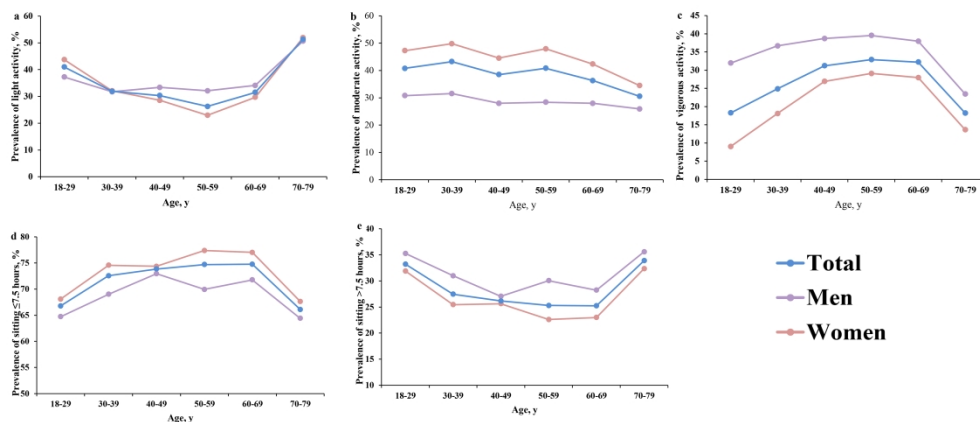

Figure 2. Changes in the age-standardized prevalence of physical activity and sitting time with aging in different gender. (a) is for light physical activity; (b) is for moderate physical activity; (c) is for vigorous physical activity. (d) is sitting time  $\leq 7.5$  hours per day; (e) is sitting time  $> 7.5$  hours per day.

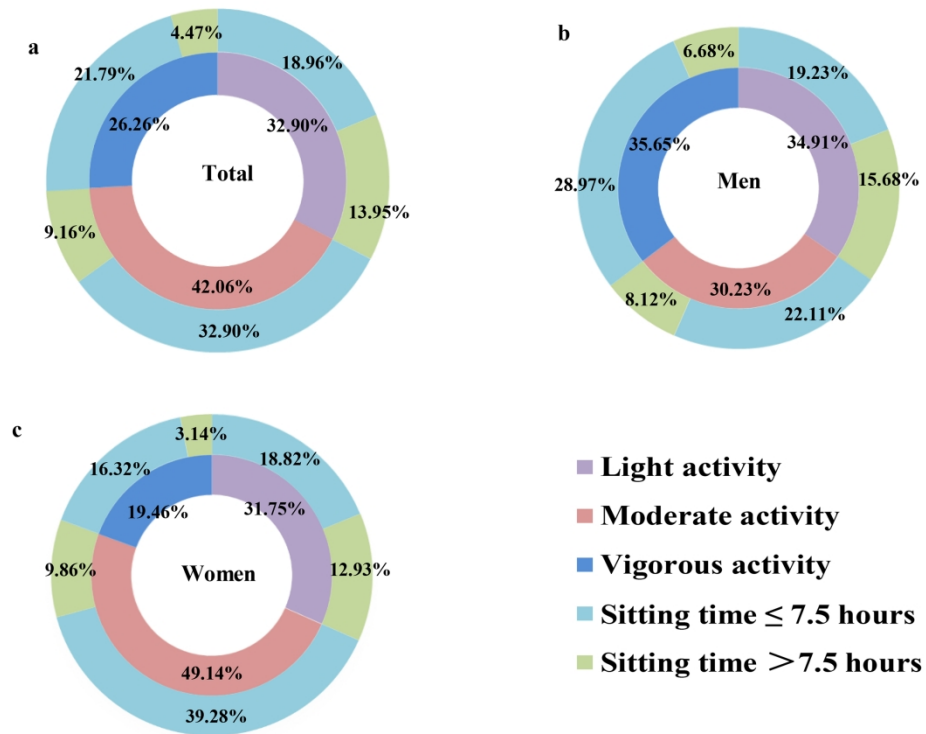

Figure 3. The age-standardized percentage according to the cut-off points of physical activity and sitting time in different gender. (a) is for total; (b) is for men; (c) is for women.

253x194mm (300 x 300 DPI)

Supplementary Table 1. 95% CI of demographic characteristics of the participants

| Variable                              | Overall<br>(N=38515) | Physical activity     |                       |                    | Sitting time per day    |                         |
|---------------------------------------|----------------------|-----------------------|-----------------------|--------------------|-------------------------|-------------------------|
|                                       |                      | Vigorous<br>(N=11510) | Moderate<br>(N=14672) | Light<br>(N=12333) | ≤7.5 hours<br>(N=28270) | >7.5 hours<br>(N=10245) |
| Age(years)                            | (55.529,55.771)      | (56.786,57.254)       | (54.425,54.815)       | (55.283,55.677)    | (55.321,55.599)         | (55.924,56.416)         |
| Sex                                   |                      |                       |                       |                    |                         |                         |
| Women                                 | (0.601,0.611)        | (0.509,0.527)         | (0.702,0.716)         | (0.554,0.572)      | (0.616,0.628)           | (0.549,0.568)           |
| Men                                   | (0.390,0.400)        | (0.473,0.491)         | (0.284,0.298)         | (0.428,0.446)      | (0.372,0.384)           | (0.432,0.451)           |
| Marital status                        |                      |                       |                       |                    |                         |                         |
| Married/cohabiting                    | (0.895,0.901)        | (0.913,0.923)         | (0.897,0.907)         | (0.868,0.879)      | (0.899,0.906)           | (0.879,0.891)           |
| Widowed/single/<br>divorced/separated | (0.099,0.105)        | (0.077,0.087)         | (0.093,0.103)         | (0.121,0.132)      | (0.094,0.101)           | (0.109,0.121)           |
| Education                             |                      |                       |                       |                    |                         |                         |
| ≤Primary school                       | (0.444,0.454)        | (0.438,0.456)         | (0.436,0.453)         | (0.446,0.463)      | (0.438,0.449)           | (0.453,0.473)           |
| ≥Junior school                        | (0.546,0.556)        | (0.544,0.562)         | (0.547,0.564)         | (0.537,0.554)      | (0.551,0.562)           | (0.527,0.547)           |
| Per capita monthly<br>income          |                      |                       |                       |                    |                         |                         |
| ≤500RMB                               | (0.352,0.362)        | (0.353,0.371)         | (0.322,0.338)         | (0.375,0.393)      | (0.342,0.353)           | (0.375,0.393)           |
| 500RMB~                               | (0.324,0.333)        | (0.315,0.332)         | (0.330,0.346)         | (0.314,0.331)      | (0.338,0.349)           | (0.278,0.296)           |
| ≥1000RMB                              | (0.310,0.319)        | (0.306,0.323)         | (0.324,0.340)         | (0.286,0.302)      | (0.304,0.315)           | (0.320,0.339)           |
| Smoking                               |                      |                       |                       |                    |                         |                         |
| Never                                 | (0.723,0.732)        | (0.739,0.755)         | (0.796,0.808)         | (0.612,0.629)      | (0.735,0.745)           | (0.683,0.701)           |
| Light                                 | (0.054,0.058)        | (0.060,0.069)         | (0.039,0.046)         | (0.059,0.068)      | (0.054,0.059)           | (0.050,0.059)           |
| Moderate                              | (0.043,0.048)        | (0.049,0.058)         | (0.032,0.037)         | (0.047,0.055)      | (0.042,0.047)           | (0.045,0.053)           |
| Heavy                                 | (0.167,0.175)        | (0.199,0.214)         | (0.116,0.126)         | (0.191,0.205)      | (0.155,0.163)           | (0.197,0.213)           |
| Drinking                              |                      |                       |                       |                    |                         |                         |
| Never                                 | (0.770,0.779)        | (0.805,0.820)         | (0.827,0.840)         | (0.661,0.677)      | (0.776,0.785)           | (0.750,0.766)           |
| Light                                 | (0.136,0.143)        | (0.147,0.161)         | (0.099,0.109)         | (0.161,0.174)      | (0.132,0.140)           | (0.142,0.155)           |
| Moderate                              | (0.045,0.049)        | (0.050,0.058)         | (0.033,0.040)         | (0.050,0.058)      | (0.045,0.050)           | (0.042,0.050)           |
| Heavy                                 | (0.037,0.041)        | (0.047,0.056)         | (0.024,0.029)         | (0.191,0.205)      | (0.039,0.046)           | (0.044,0.052)           |
| Dietary habits                        |                      |                       |                       |                    |                         |                         |
| (Kg/Month)                            |                      |                       |                       |                    |                         |                         |
| Meat and poultry                      | (1.307,1.333)        | (1.309,1.357)         | (1.378,1.421)         | (1.190,1.235)      | (1.298,1.329)           | (1.312,1.363)           |
| Fishery products                      | (0.110,0.113)        | (0.111,0.117)         | (0.115,0.120)         | (0.099,0.105)      | (0.104,0.108)           | (0.124,0.130)           |
| Vegetables and fruits                 | (13.723,13.872)      | (13.933,14.205)       | (14.559,14.798)       | (12.363,12.625)    | (13.189,13.358)         | (15.089,15.395)         |
| Soy products                          | (0.472,0.485)        | (0.522,0.546)         | (0.481,0.502)         | (0.401,0.422)      | (0.478,0.493)           | (0.448,0.472)           |
| Height(cm)                            | (159.608,159.772)    | (159.921,160.219)     | (158.493,158.747)     | (160.499,160.801)  | (159.495,159.685)       | (159.819,160.141)       |
| Weight(kg)                            | (63.369,63.591)      | (64.092,64.508)       | (62.276,62.624)       | (63.721,64.119)    | (63.471,63.729)         | (62.931,63.369)         |
| BMI(kg/m <sup>2</sup> )               | (24.804,24.876)      | (24.964,25.096)       | (24.713,24.827)       | (24.657,24.783)    | (24.878,24.962)         | (24.54,24.68)           |
| WC(cm)                                | (83.966,84.174)      | (85.027,85.413)       | (83.285,83.615)       | (83.467,83.833)    | (84.299,84.541)         | (82.896,83.304)         |



Supplementary Table 2. Prevalence of physical activity and sitting time about various characteristics

| Variable                              | Physical activity     |                       |                    | <i>P</i> | Sitting time per day    |                         | <i>P</i> |
|---------------------------------------|-----------------------|-----------------------|--------------------|----------|-------------------------|-------------------------|----------|
|                                       | Vigorous<br>(N=11510) | Moderate<br>(N=14672) | Light<br>(N=12333) |          | ≤7.5 hours<br>(N=29270) | >7.5 hours<br>(N=10245) |          |
| Age, n (%)                            |                       |                       |                    | <0.001   |                         |                         | <0.001   |
| 18~                                   | 220(17.49)            | 558(44.36)            | 480(38.16)         |          | 910(72.34)              | 348(27.66)              |          |
| 30~                                   | 685(25.19)            | 1172(43.10)           | 862(31.70)         |          | 1975(72.64)             | 744(27.36)              |          |
| 40~                                   | 2275(31.71)           | 2807(39.13)           | 2092(29.16)        |          | 5327(74.25)             | 1847(25.75)             |          |
| 50~                                   | 3539(33.36)           | 4320(40.73)           | 2748(25.91)        |          | 7965(75.09)             | 2642(24.91)             |          |
| 60~                                   | 3861(31.99)           | 4358(36.11)           | 3849(31.89)        |          | 8996(74.54)             | 3072(25.46)             |          |
| 70~79                                 | 930(19.83)            | 1457(31.07)           | 2302(49.09)        |          | 3097(66.05)             | 1592(33.95)             |          |
| Sex, n (%)                            |                       |                       |                    | <0.001   |                         |                         | <0.001   |
| Women                                 | 5963(25.58)           | 10402(44.62)          | 6945(29.79)        |          | 17588(75.45)            | 5722(24.55)             |          |
| Men                                   | 5547(36.48)           | 4270(28.08)           | 5388(35.44)        |          | 10682(70.25)            | 4523(29.75)             |          |
| Marital status, n (%)                 |                       |                       |                    | <0.001   |                         |                         | <0.001   |
| Married/cohabiting                    | 10567(30.57)          | 13231(38.27)          | 10773(31.16)       |          | 25502(73.77)            | 9069(26.23)             |          |
| Widowed/single/<br>divorced/separated | 943(23.91)            | 1441(36.54)           | 1560(39.55)        |          | 2768(70.18)             | 1176(29.82)             |          |
| Education, n (%)                      |                       |                       |                    | 0.234    |                         |                         | 0.001    |
| ≤Primary school                       | 5149(29.81)           | 6521(37.74)           | 5607(32.45)        |          | 12533(72.54)            | 4744(27.46)             |          |
| ≥Junior school                        | 6361(29.95)           | 8151(38.38)           | 6726(31.67)        |          | 15737(74.10)            | 5501(25.90)             |          |
| Per capita monthly<br>income, n (%)   |                       |                       |                    | <0.001   |                         |                         | <0.001   |
| ≤500RMB                               | 4169(30.33)           | 4841(35.22)           | 4736(34.45)        |          | 9812(71.38)             | 3934(28.62)             |          |
| 500RMB~                               | 3724(29.42)           | 4959(39.18)           | 3974(31.40)        |          | 9720(76.80)             | 2937(23.20)             |          |
| ≥1000RMB                              | 3617(29.86)           | 4872(40.23)           | 3623(29.91)        |          | 8738(72.14)             | 3374(27.86)             |          |
| Smoking, n (%)                        |                       |                       |                    | <0.001   |                         |                         | <0.001   |
| Never                                 | 7652(27.31)           | 11768(41.99)          | 8603(30.70)        |          | 20929(74.69)            | 7094(25.31)             |          |
| Light                                 | 786(36.52)            | 625(29.04)            | 741(34.43)         |          | 1599(74.30)             | 553(25.70)              |          |
| Moderate                              | 632(36.11)            | 505(28.86)            | 613(35.03)         |          | 1252(71.54)             | 498(28.46)              |          |
| Heavy                                 | 2440(37.03)           | 1774(26.92)           | 2376(36.05)        |          | 4490(68.13)             | 2100(31.87)             |          |
| Drinking, n (%)                       |                       |                       |                    | <0.001   |                         |                         | <0.001   |
| Never                                 | 8257(27.68)           | 12223(40.97)          | 9353(31.35)        |          | 22068(73.97)            | 7765(26.03)             |          |
| Light                                 | 2065(38.53)           | 1525(28.45)           | 1770(33.02)        |          | 3840(71.64)             | 1520(28.36)             |          |
| Moderate                              | 668(36.70)            | 534(29.34)            | 618(33.96)         |          | 1351(74.23)             | 469(25.77)              |          |
| Heavy                                 | 520(34.62)            | 390(25.97)            | 592(39.41)         |          | 1011(67.31)             | 491(32.69)              |          |

# BMJ Open

## The prevalence and influence factors of physical activity and sedentary behavior in Chinese rural population: The Henan Rural Cohort Study

|                                 |                                                                                                                                                                                                                                                                                                                                                                                                                                                                                                                                                                                                                                                                                                                                                                                                                                                                                                                                                                                                                                                                                                                                                                                                                                                                                                                               |
|---------------------------------|-------------------------------------------------------------------------------------------------------------------------------------------------------------------------------------------------------------------------------------------------------------------------------------------------------------------------------------------------------------------------------------------------------------------------------------------------------------------------------------------------------------------------------------------------------------------------------------------------------------------------------------------------------------------------------------------------------------------------------------------------------------------------------------------------------------------------------------------------------------------------------------------------------------------------------------------------------------------------------------------------------------------------------------------------------------------------------------------------------------------------------------------------------------------------------------------------------------------------------------------------------------------------------------------------------------------------------|
| Journal:                        | <i>BMJ Open</i>                                                                                                                                                                                                                                                                                                                                                                                                                                                                                                                                                                                                                                                                                                                                                                                                                                                                                                                                                                                                                                                                                                                                                                                                                                                                                                               |
| Manuscript ID                   | bmjopen-2019-029590.R2                                                                                                                                                                                                                                                                                                                                                                                                                                                                                                                                                                                                                                                                                                                                                                                                                                                                                                                                                                                                                                                                                                                                                                                                                                                                                                        |
| Article Type:                   | Research                                                                                                                                                                                                                                                                                                                                                                                                                                                                                                                                                                                                                                                                                                                                                                                                                                                                                                                                                                                                                                                                                                                                                                                                                                                                                                                      |
| Date Submitted by the Author:   | 27-Jun-2019                                                                                                                                                                                                                                                                                                                                                                                                                                                                                                                                                                                                                                                                                                                                                                                                                                                                                                                                                                                                                                                                                                                                                                                                                                                                                                                   |
| Complete List of Authors:       | Tu, Runqi ; Zhengzhou University, Department of Epidemiology and Biostatistics, College of Public Health<br>Li, Yuqian; Zhengzhou University, Department of Clinical Pharmacology, School of Pharmaceutical Science<br>Shen, Lijun; Henan Provincial People's Hospital, Department of Endocrinology and Metabolism<br>Yuan, HuiJuan; Henan Provincial People's Hospital, Department of Endocrinology and Metabolism<br>Mao, Zhenxing ; Zhengzhou University, Department of Epidemiology and Biostatistics, College of Public Health<br>Liu, Xiaotian; Zhengzhou University, Department of Epidemiology and Biostatistics, College of Public Health<br>Zhang, Haiqing; Zhengzhou University, Department of Epidemiology and Biostatistics, College of Public Health<br>zhang, Liying; Zhengzhou University, Department of Epidemiology and Biostatistics, College of Public Health<br>Li, Ruiying; Zhengzhou University, Department of Epidemiology and Biostatistics, College of Public Health<br>Wang, Yikang; Zhengzhou University, Department of Epidemiology and Biostatistics, College of Public Health<br>Wang, Yuming; Henan Provincial People's Hospital, Department of Endocrinology and Metabolism<br>Wang, Chongjian; Zhengzhou University, Department of Epidemiology and Biostatistics, College of Public Health |
| <b>Primary Subject Heading</b>: | Public health                                                                                                                                                                                                                                                                                                                                                                                                                                                                                                                                                                                                                                                                                                                                                                                                                                                                                                                                                                                                                                                                                                                                                                                                                                                                                                                 |
| Secondary Subject Heading:      | Public health, Epidemiology, Sports and exercise medicine                                                                                                                                                                                                                                                                                                                                                                                                                                                                                                                                                                                                                                                                                                                                                                                                                                                                                                                                                                                                                                                                                                                                                                                                                                                                     |
| Keywords:                       | physical activity, sedentary behaviour, prevalence, rural population                                                                                                                                                                                                                                                                                                                                                                                                                                                                                                                                                                                                                                                                                                                                                                                                                                                                                                                                                                                                                                                                                                                                                                                                                                                          |
|                                 |                                                                                                                                                                                                                                                                                                                                                                                                                                                                                                                                                                                                                                                                                                                                                                                                                                                                                                                                                                                                                                                                                                                                                                                                                                                                                                                               |

SCHOLARONE™  
Manuscripts

**Title:**

**The prevalence and influence factors of physical activity and sedentary behavior in Chinese rural population: The Henan Rural Cohort Study**

**Authors:**

Runqi Tu<sup>a†</sup>, Yuqian Li<sup>b†</sup>, Lijun Shen<sup>c,d</sup>, Huijuan Yuan<sup>c,d</sup>, Zhenxing Mao<sup>a</sup>, Xiaotian Liu<sup>a</sup>, Haiqing Zhang<sup>a</sup>, Liying Zhang<sup>a</sup>, Ruiying Li<sup>a</sup>, Yikang Wang<sup>a</sup>, Yuming Wang<sup>c,d\*</sup>, Chongjian Wang<sup>a\*</sup>

**Authors affiliations:**

<sup>a</sup> Department of Epidemiology and Biostatistics, College of Public Health, Zhengzhou University, Zhengzhou, Henan, *PR* China.

<sup>b</sup> Department of Clinical Pharmacology, School of Pharmaceutical Science, Zhengzhou University, Zhengzhou, Henan, *PR* China.

<sup>c</sup> Department of Endocrinology and Metabolism, Henan Provincial People's Hospital, Zhengzhou, Henan, *PR* China.

<sup>d</sup> Department of Endocrinology and Metabolism, Zhengzhou University People's Hospital, Zhengzhou, Henan, *PR* China.

† Runqi Tu and Yuqian Li contributed equally to this work.

**\* Correspondence author**

Dr. Chongjian Wang & Yuming Wang

Department of Epidemiology and Biostatistics

College of Public Health, Zhengzhou University

100 Kexue Avenue, Zhengzhou, 450001, Henan, *PR* China

Phone: +86 371 67781452;

Fax: +86 371 67781868

E-mail: [tjwcj2005@126.com](mailto:tjwcj2005@126.com) & [henanyuming@sina.com](mailto:henanyuming@sina.com)

## Abstract

**Objectives:** The study aimed to estimate prevalence and influencing factors of physical activity (PA) and sedentary behavior (SB) in rural areas of China.

**Design:** Cross-sectional study.

**Setting:** A multistage, stratified cluster sampling method was used to obtain samples in the general population of Henan province in China.

**Participants:** 38515 participants aged 18 to 79 years were enrolled from the Henan Rural Cohort Study for the cross-sectional study.

**Main outcome measures:** International Physical Activity Questionnaire (IPAQ) was used to assess the levels of PA and SB. Multiple logistic regression analysis was used to calculate odds ratios (ORs) and 95% confidence interval (CI) of potential influencing factors with physical inactivity.

**Results:** The age-standardized prevalence of light PA and sitting >7.5 hours per day were 32.74% and 26.88% in the general Chinese rural adults, respectively. Gender differences were: 34.91%, 29.76% for men and 31.75%, 25.16% for women respectively. The prevalence of participants with both light PA and sitting >7.5 hours per day was 13.95%. Education  $\geq$  Junior middle school, divorced/widowed/unmarried, 1000RMB > per capita monthly income  $\geq$  500RMB, sitting >7.5 hours per day were negatively associated with low PA and being male, heavy smoking, fishery products, vegetables and fruits, moderate and light PA were negatively associated with sitting >7.5 hours per day.

**Conclusion:** Physical inactivity and SB were high in rural China. There is an increased need in promoting healthy lifestyle to rural population.

### Clinical Trial Registration

The Henan Rural Cohort study has been registered at Chinese Clinical Trial Register (Registration number: ChiCTR-OOC-15006699). <http://www.chictr.org.cn/showproj.aspx?proj=11375>

**Key words:** physical activity; sedentary behavior; prevalence; rural population

**Strengths and limitations of this study**

- The study was focused on rural population.
- The study was based on a large sample.
- Enough potential confounding variables were included in this study.
- The study were based on a cross-sectional study.
- The questionnaire was a standard version.

For peer review only

## Introduction

Over the past few decades, epidemiologic studies have suggested that physical inactivity or sedentary behavior (SB) were risk factors for non-communicable diseases (NCDs), such as breast cancer [1], prostate cancer [2], cardiovascular diseases (CVD) [3], stroke [4], type 2 diabetes mellitus (T2DM) [5], and metabolic syndrome [6]. Moreover, a study ranging from eastern Mediterranean to western Pacific region showed that more than 5.3 million death would be avoided each year, if the inactive people become active [7]. In addition to the burden of disease, physical inactivity and SB also result in the substantial economic burden to patients and society, especially in rural areas with limited resources [8].

The prevalence of physically inactivity was about 31.1% all over the world, and varied by regions. For instance, the prevalence of physically inactivity was 43.3% in USA, while it was just 17.0% in southeast Asia [9]. Even in a country, the prevalence of physically inactivity also varies from region to region. In China, the prevalence of physically inactive was 63.1% in Shenzhen [10], and another study in Shanghai showed that only 18.4% of participants met physically activity (PA) [11]. Although previous studies had explored the prevalence of PA and SB among inhabitants of urban China, there is little evidence in rural areas of China that have undergone rapid socio-economic development [12]. Therefore, updating the prevalence and risk factors of PA and SB, and then evaluating the levels of PA and SB in rural areas of China are necessary to provide important evidence to generate strategy and promote PA in the population.

The objectives of the current study were: (1) to explore the prevalence of PA and SB, (2) to investigate potential influencing factors of PA and SB.

## Methods

### Settings and participants

This cross-sectional study was carried from 2015 to 2017 in five rural regions (Suiping, Yuzhou, Xinxiang, Tongxu, and Yima countries) of Henan province. The participants were permanent residents aged 18-79 years. 744 participants with deficient information about their PA and sitting time were excluded. Ultimately, 38515 participants with completed questionnaires, anthropometric measurements and blood tests were included in our analysis.

### Data collection

The detail of the sampling process were previously reported [13]. Briefly, a multistage, stratified

1  
2  
3  
4 cluster sampling method was used. First stage, five rural counties were selected in Henan province  
5  
6 of central, south, north, east, and west. Second stage, one to three rural communities (referred to  
7  
8 as 'townships') in each county were selected. Last stage, all permanent residents who were 18-79  
9  
10 years and signed informed consent were selected as the study sample. The information was  
11  
12 collected by face-to-face interview. The data about general demographic characteristics, and  
13  
14 lifestyles were included in a standard questionnaire. Educational level was classified into primary  
15  
16 school or below and junior middle school or above, marital status into married/cohabitation and  
17  
18 unmarried/divorced/widowed categories. In accordance with the smoking index of the World  
19  
20 Health Organization (WHO) [14], the smoking status were divided into never smoking, light  
21  
22 smoking, moderate smoking, and heavy smoking. According to daily alcohol intake of WHO [14],  
23  
24 drinking was categorized into never drinking, light drinking, moderate drinking, and heavy  
25  
26 drinking. According to Chinese dietary guidelines [15], dietary habits were evaluated from the four  
27  
28 aspects of meat and poultry, fishery products, vegetables and fruits, and soy products. The waist  
29  
30 circumference (WC), by a non-elastic tape to the nearest 0.1 cm, was measured at 1 cm above the  
31  
32 navel in a horizontal plane. Height, using a wall-mounted ruler tape with an insertion buckle at  
33  
34 one end to the nearest 0.1 cm, was measured twice without shoes. Body weight, using mechanical  
35  
36 scale on a level surface to the nearest 0.1 kg, was measured once with the subjects in light clothing  
37  
38 and barefoot [16]. Body mass index (BMI) was calculated as weight in kilograms divided by the  
39  
40 square of height in meters.

#### 41 **Ethical considerations**

42  
43 The purpose and the importance of the study were explained to the participants. Confidentiality  
44  
45 of the information was maintained throughout the study by excluding personal identifiers from the  
46  
47 data collection form.

#### 48 **Patient and public involvement**

49  
50 Neither patients nor the public were involved in developing this project.

#### 52 **Definitions**

53  
54 International Physical Activity Questionnaire (IPAQ) was used to assess the levels of PA and SB  
55  
56 [17]. All the weekly time of vigorous activity, moderate activity and walking was calculated with the  
57  
58 number of Mets in each category and average daily estimated. Mets reflected the energy expenditure  
59  
60 specific for vigorous activity, moderate activity and walking. In this study, the Mets of vigorous

activity was 8; the Mets of moderate activity was 4; the Mets of walking was 3.3. The value of Mets was estimated by the sum of the three physical activities in one week. The PA categorized into three levels were light (physically inactive), moderate and vigorous [9, 18]. These categories were based on standard scoring criteria of IPAQ. The vigorous activity should meet either of the following two criteria: (1) vigorous activity was at least 3 days/week and the week of accumulating Mets was at least 1500 MET-minutes/week; (2) any combination of vigorous activity, moderate activity or walking at least 5 days/week and the accumulating Mets was at least 3000 MET-minutes/week. The moderate activity should meet either of the following four criteria: (1) moderate activity was at least 30 min in 5 days a week; (2) vigorous activity was at least 20 min in 3 days a week; (3) walking at least 30 min a day for 5 or more days a week; (4) the accumulating Mets, of any combination of moderate activity, vigorous activity or walking, was at least 600 MET-minutes/week in 5 or more days a week. The light activity category were for individuals who neither met vigorous nor moderate criteria. In addition, about the SB, the cut-point was set 7.5 hours [19, 20]. At same time, according the WHO, the PA was classified into insufficiently active, active, and highly active. Insufficiently active was doing some moderate- or vigorous-intensity physical activity but less than 150 minutes of moderate-intensity physical activity a week or 75 minutes of vigorous-intensity physical activity or the equivalent combination. Active is doing the equivalent of 150 minutes to 300 minutes of moderate-intensity physical activity a week. Highly active is doing the equivalent of more than 300 minutes of moderate-intensity physical activity a week [21, 22].

### Statistical analysis

Continuous variables were presented as mean  $\pm$  standard deviation (SD). Differences between two groups were tested using t-test and more than two group were tested using ANOVA. Categorical variables presented as numbers and percentages were compared using chi-square test. Based on Chinese population data from 2010 census, direct standardization was used to calculate the age-standardized prevalence of Mets. The multinomial logistic regression models were used to calculate ORs and 95% CI between the potential factors and Mets. All statistical tests were two-tailed, and P value  $<0.05$  was considered statistically significant. The data were analyzed using SAS9.1 software package (SAS Institute, USA) and R version 3.5.1.

### Result

#### Demographic characteristics.



1  
2  
3  
4 Table1 showed the demographic characteristics of the 38515 participants aged from 18 to 79  
5 years old. The mean (standard deviation, SD) age was 55.65(12.14) years. Overall, a total of 11510,  
6 14672 and 12333 subjects were engaged in vigorous, moderate and light PA, respectively. Being  
7 man, married/cohabiting, the smoking of light, moderate and heavy level and the drinking of light  
8 and moderate were more common among vigorous activity participants, while older age,  
9 widowed/single/divorced/separated,  $\leq$ Primary school, per capita monthly income  $\leq$ 500RMB, heavy  
10 drinking were more prevalent among moderate PA participants. Among the 38515 participants,  
11 29270 were sitting  $\leq$ 7.5 hours per day. Being women, married/cohabiting,  $\geq$ Junior school, 500RMB  
12  $<$ per capita monthly income  $<$ 1000RMB, never smoking and never drinking were more prevalent  
13 in the subjects with sitting  $\leq$ 7.5 hours per day than sitting  $>$ 7.5 hours per day ( $p<0.001$ ).  
14 Supplementary table 1 showed the demographic characteristics according to WHO.

#### 25 **The sex-specific distributions of PA and sitting time according to age.**

26  
27 Figure 1 describes the sex-specific distribution of the Mets of PA and sitting time according to  
28 age. The median of Mets for PA and sitting time were 7092 MET-minutes/week and 5 h.,  
29 respectively. The median of Mets for PA and sitting time were 6558 MET-minutes/week, 7119  
30 MET-minutes/week and 5 h, 5 h for men and women, respectively. The mean  $\pm$  standard deviation  
31 (SD) of Mets for PA and sitting time were 7626.02 $\pm$ 4229.32 MET-minutes/week and 5.70 $\pm$ 3.23  
32 h., respectively. The mean  $\pm$  SD of Mets for PA and sitting time were 7506.15 $\pm$ 4524.75 MET-  
33 minutes/week, 7704.20 $\pm$ 4023.12 MET-minutes/week and 5.97 $\pm$ 3.39 h, 5.53 $\pm$ 3.12 h for men  
34 and women ( $P<0.001$ ), respectively. Notably, the sitting time of the men was higher women. The  
35 50-59 age group had the highest Mets. The 70-79 age group had the highest sitting time.

#### 44 **Prevalence of light PA and sitting $>$ 7.5 hours per day.**

45  
46 Supplementary table 2 displays the prevalence of light PA and sitting  $>$ 7.5 hours per day among  
47 various characteristics. The prevalence of light PA and sitting  $>$ 7.5 hours per day were 32.02%  
48 and 26.60%, and the corresponding age-standardized rates were 32.90% and 26.88%, respectively.  
49 Subgroups study showed that the prevalence of low PA and sitting  $>$ 7.5 hours per day were higher  
50 in those who were younger or older, being men, Widowed/single/divorced/separated with lower  
51 per capita monthly income, heavy smoking and drinking.

#### 58 **Changes of light PA and sitting $>$ 7.5 hours per day in different subgroup.**

59  
60 Figure 2 presents that the age-standardized prevalence of light PA and sitting  $>$ 7.5 hours per

1  
2  
3  
4 day changed with age in both sexes. The prevalence of light PA and sitting >7.5 hours per day  
5  
6 decreased with age firstly and then increased. Men had higher probability of having high PA and  
7  
8 sitting >7.5 hours per day than women in all the age groups. Supplementary figure 1 showed the  
9  
10 age-standardized prevalence according to WHO.

### 11 **The percentage according to the cut-off points of PA and sitting time in different sexes.**

12  
13 Figure 3 shows the age-standardized percentage according to the cut-off points of PA and  
14  
15 sitting time in different sexes. 17346 subjects (7434 men and 9912 women) had light PA or  
16  
17 sitting >7.5 hours per day, and the corresponding age-standardized prevalence was 45.84%  
18  
19 (48.99% in men and 43.98% in women). The age-standardized prevalence of participants with  
20  
21 both light PA and single sitting >7.5 hours per day was 13.95% (15.68% in men and 12.93% in  
22  
23 women). Supplementary figure 2 showed the age-standardized percentage according to the cut-off  
24  
25 points of WHO and sitting time.

### 26 **Analysis of influencing Determinants.**

27  
28 Table2 describes the odds ratios (*ORs*) of potential influencing determinants association with  
29  
30 light PA and sitting time >7.5 hours per day. Being women, 18-29 age group, level of education  
31  
32  $\geq$ Junior middle school, divorced/widowed/unmarried, 1000RMB >per capita monthly income  $\geq$ 500  
33  
34 RMB, never smoking and drinking, and sitting time per day were significantly negatively associated  
35  
36 with light PA; while being men, level of education  $\leq$ Primary school, per capita monthly income  
37  
38 <500 RMB, heavy smoking and drinking, fishery products, vegetables and fruits were significantly  
39  
40 negatively association with sitting >7.5 hours per day. Supplementary table 3 showed the potential  
41  
42 influencing determinants according to WHO.  
43  
44  
45  
46  
47  
48  
49  
50  
51  
52  
53  
54  
55  
56  
57  
58  
59  
60

## Discussion

New insights of PA and SB were provided by the results from this large survey among rural population in Henan of China. Overall, the median levels of sitting time were higher in rural adults of China than the previous study of a 20-country comparison of sitting [23], and the percent levels of physical inactivity were higher in Chinese rural adults than the previous study of global PA levels [9]. There was an association of decreased PA with age firstly and then increased in the prevalence of light PA and sitting >7.5 hours per day. The percent individuals that had both light PA and sitting >7.5 hours per day were 15.68%, 12.93% and 13.95% in men, women and total, respectively. Further analysis of multiple logistic regression presented that gender, age, the level of education, marital status, smoking, drinking and vegetables intake were influencing factors for light PA and sitting >7.5 hours.

Previous studies had shown that the levels of physical inactivity and sedentary was high in urban China [10, 11]. Compared to urban area, the rural area stay a relatively low level. The different might be explained by the developmental level. The mean of Mets increased with age firstly and then at the age group of 50-59 decreased. While the sitting time was highest in 70-79 age group. It is likely that the decline in physical ability with age limits the PA and increase the sedentary nature of the elderly [24]. Furthermore, the aged might fear injuries, which was an-other reason to lead them into physical inactivity [25]. About PA, the subgroup analysis showed that under the various characteristics, the prevalence of vigorous PA was about 30%, moderate PA was about 40% and the light PA was about 30%. While about sitting time, under all the various characteristics, the sitting time  $\leq 7.5$  hours per day was about 70%. These results were similar to a Chilean study [23].

The results of co-existence of PA and sedentary behavior showed that light PA and sitting time >7.5 hours per day was 15.68%, 12.93% and 13.95 in men, women and total, respectively. It was similar with a study from Japan [26]. For these participants who were light PA and sitting time >7.5 hours per day, should take a measure to promote the PA.

Evidence showed that there were negative relationships between junior middle school or above, divorced/widowed/unmarried, per capita monthly income  $\geq 500$  RMB and meat and poultry consumption and moderate PA. Having a junior middle school or above, divorced/widowed/unmarried, 1000RMB > per capita monthly income  $\geq 500$  RMB, and sitting

1  
2  
3  
4 time per day >7.5 hours were negative association with light PA. For sitting >7.5 hours per day,  
5  
6 the negative factors were being men, divorced/widowed/unmarried, heavy smoking, Fishery  
7  
8 products and vegetable and fruits intake.

9  
10 The current study focused on the epidemiologic characteristics of PA and SB based on a  
11  
12 relatively large sample size of rural population in Henan of China. Although a series of measures,  
13  
14 such as standardized tools and training implementation, had been done to guarantee the  
15  
16 authenticity, there were several limitations. First, these results were based on a cross-sectional  
17  
18 study, so the causal relationships between factors and PA or SB could not be confirmed. Second,  
19  
20 the responses were from self-reported data, which could distort real facts. Third, according to the  
21  
22 actual rural circumstances, the residents who studied or worked in cities were not included in this  
23  
24 study, so the prevalence of Mets might be over or under estimated in rural population. Fourth, the  
25  
26 subjects of the present study had asymmetrical age structure, which might lead to potential bias of  
27  
28 IPAQ. Fifth, according to the actual rural circumstances, the residents who studied or worked in  
29  
30 city were not included in this study, so the prevalence of PA and SB might be overestimated in  
31  
32 rural population. Although these limitations existed in the study, the relatively large  
33  
34 epidemiological study also could reflect the prevalence of PA and SB in rural areas of China.

### 35 **Conclusion**

36  
37 This study suggests relatively higher prevalence of physical inactivity and SB among Chinese  
38  
39 rural adults has emerged with economic and social transition. More attention should be given to  
40  
41 the aged and drinking individuals who are at high risk of physical inactivity.

### 42 **Acknowledgements**

43  
44  
45 The authors thank all of the participants, coordinators, and administrators for their support and  
46  
47 help during the research. In addition, the authors would like to thank Dr. Tanko Abdulai for his  
48  
49 critical reading of the manuscript.

### 50 **Ethics approval and consent to participate**

51  
52  
53 Ethics approval was obtained from the “Zhengzhou University Life Science Ethics Committee”,  
54  
55 and written informed consent was obtained for all participants. Ethic approval code: [2015] MEC  
56  
57 (S128).  
58  
59  
60

1  
2  
3  
4 The purpose and the importance of the study were explained to the participants. Information  
5 confidentiality was maintained throughout the study by excluding personal identifiers from the  
6 data collection form.  
7

#### 8 9 **Consent for publication**

10 All authors consent for publication

#### 11 12 **Conflict of interest**

13 The authors declared no conflict of interest associated with this manuscript.  
14

#### 15 16 **Funding**

17 This research was supported by the National Key Research and Development Program  
18 Precision Medicine Initiative of China (Grant NO: 2016YFC0900803), National Natural Science  
19 Foundation of China (Grant NO: 81573243, 81602925), Henan Science and Technology  
20 Development Funds (Grant NO: 182207310001), Henan Natural Science Foundation (Grant NO:  
21 182300410293), Science and Technology Foundation for Innovation Talent of Henan Province  
22 (Grant NO: 164100510021), Science and Technology Innovation Talents Support Plan of Henan  
23 Province Colleges and Universities (Grant NO: 14HASTIT035). The funders had no role in the  
24 study design, data collection and analysis, decision to publish, or preparation of the manuscript.  
25  
26  
27  
28  
29  
30  
31  
32  
33  
34  
35

#### 36 37 **Data sharing statement**

38 All relevant data are within the paper and its Supporting Information files. Contact to Dr.  
39 Chongjian Wang (tjwcj2005@126.com) for additional information regarding data access.  
40  
41

#### 42 43 **Author Contributions**

44 C.J.W. and Y.M.W. conceived and designed the study. R.Q.T., Y.L.Q., L.J.S., H.J.Y., Z.X.M.,  
45 X.T.L.,H.Q.Z., L.Y.Z., R.Y.L, and Y.K.W. coordinated data collection. Y.L.Q., L.J.S., H.J.Y.,  
46 Z.X.M., X.T.L.,H.Q.Z., L.Y.Z., R.Y.L, and Y.K.W. conducted the analyses. R.Q.T. wrote the  
47 manuscript. All co-authors critically revised the manuscript. All authors have approved the final  
48 manuscript. All co-authors critically revised the manuscript. All authors have approved the final  
49 manuscript.  
50  
51  
52

#### 53 54 **Reference**

55 [1] Fararouei M, Iqbal A, Rezaian S, Gheibi Z, Dianatinasab A, Shakarami S, Dianatinasab M.  
56 Dietary Habits and Physical Activity are Associated With the Risk of Breast Cancer Among  
57  
58  
59  
60

- 1  
2  
3  
4 Young Iranian Women: A Case-control Study on 1010 Premenopausal Women. *Clin Breast*  
5 *Cancer*. 2018 Nov 2. pii: S1526-8209(18)30622-0.  
6  
7 [2] Sormunen J, Talibov M, Sparén P, Martinsen JI, Weiderpass E, Pukkala E. Perceived Physical  
8 Strain at Work and Incidence of Prostate Cancer – a Case-Control Study in Sweden and Finland.  
9 *Asian Pac J Cancer Prev*. 2018 Aug 24;19(8):2331-2335.  
10  
11 [3] Ambakederemo TE, Chikezie EU. Assessment of some traditional cardiovascular risk factors  
12 in medical doctors in Southern Nigeria. *Vasc Health Risk Manag*. 2018 Oct 24;14:299-309.  
13  
14 [4] Sarfo FS, Mobula LM, Plange-Rhule J, Ansong D, Ofori-Adjei D. Incident stroke among  
15 Ghanaians with hypertension and diabetes: A multicenter, prospective cohort study. *J Neurol Sci*.  
16 2018 Dec 15;395:17-24.  
17  
18 [5] Chang C, Khurana S, Strodel R, Camp A, Magenheimer E, Hawley N. Perceived Barriers to  
19 Physical Activity Among Low-Income Latina Women at Risk for Type 2 Diabetes. *Diabetes*  
20 *Educ*. 2018 Oct;44(5):444-453.  
21  
22 [6] El Bilbeisi AH, Hosseini S, Djafarian K. The Association between Physical Activity and the  
23 Metabolic Syndrome among Type 2 Diabetes Patients in Gaza Strip, Palestine. *Ethiop J Health*  
24 *Sci*. 2017 May;27(3):273-282.  
25  
26 [7] Lee IM, Shiroma EJ, Lobelo F, Puska P, Blair SN, Katzmarzyk PT; Lancet Physical Activity  
27 Series Working Group. Effect of physical inactivity on major non-communicable diseases  
28 worldwide: an analysis of burden of disease and life expectancy. *Lancet*. 2012 Jul 21;  
29 380(9838):219-29.  
30  
31 [8] Ding D, Lawson KD, Kolbe-Alexander TL, Finkelstein EA, Katzmarzyk PT, van Mechelen  
32 W, Pratt M; Lancet Physical Activity Series 2 Executive Committee. The economic burden of  
33 physical inactivity: a global analysis of major non-communicable diseases. *Lancet*. 2016 Sep  
34 24;388(10051):1311-24.  
35  
36 [9] Hallal PC, Andersen LB, Bull FC, Guthold R, Haskell W, Ekelund U; Lancet Physical Activity  
37 Series Working Group. Global physical activity levels: surveillance progress, pitfalls, and  
38 prospects. *Lancet*. 2012 Jul 21;380(9838):247-57.  
39  
40 [10] Zhou Y, Wu J, Zhang S, Yan S, He L, Mkandawire N, Song X, Gan Y, Li W, Yang T, Li J,  
41 Zeng X, Wang Z, Lu Z. Prevalence and risk factors of physical inactivity among middle-aged and  
42 older Chinese in Shenzhen: a cross-sectional study. *BMJ Open*. 2018 Oct 15;8(10):e019775.  
43  
44  
45  
46  
47  
48  
49  
50  
51  
52  
53  
54  
55  
56  
57  
58  
59  
60

- 1  
2  
3  
4 [11] Chen ST, Liu Y, Hong JT, Tang Y, Cao ZB, Zhuang J, Zhu Z, Chen PJ. Co-existence of  
5 physical activity and sedentary behavior among children and adolescents in Shanghai, China: do  
6 gender and age matter? *BMC Public Health*. 2018 Nov 22;18(1):1287.  
7  
8  
9 [12] Ding C, Song C, Yuan F, Zhang Y, Feng G, Chen Z, Liu A. The Physical Activity Patterns  
10 among Rural Chinese Adults: Data from China National Nutrition and Health Survey in  
11 2010~2012. *Int J Environ Res Public Health*. 2018 May 9;15(5).  
12  
13 [13] Liu X, Mao Z, Li Y, Wu W, Zhang X, Huo W, Yu S, Shen L, Li L, Tu R, Wu H, Li H, He M,  
14 Liu L, Wei S, Li W, Wu T, Wang C. The Henan Rural Cohort: a prospective study of chronic non-  
15 communicable diseases. *Int J Epidemiol*. 2019 Mar 26.  
16  
17 [14]. Ediriweera BR TS, Sir RD, Robin R, International guide for monitoring alcohol consumption  
18 and related harm (ed. World Health Organization), Geneva. 51 (2000).  
19  
20 [15] Chinese Nutrition Society (2011) The dietary guidelines for Chinese residents. The Tibet  
21 people's Publishing House: Lhasa pp 97, 197, 198.  
22  
23 [16] People's Republic of China Ministry of Health Disease Control Division. Overweight and  
24 Obesity Prevention and Control Guidelines in Chinese Adults, People's Republic of China  
25 Ministry of Health Disease Control Division, Beijing, China, 2003 (Chinese).  
26  
27 [17] Bennie JA, Chau JY, van der Ploeg HP, Stamatakis E, Do A, Bauman A. The prevalence and  
28 correlates of sitting in European adults - a comparison of 32 Eurobarometer-participating  
29 countries. *Int J Behav Nutr Phys Act*. 2013 Sep 11;10:107. doi: 10.1186/1479-5868-10-107  
30  
31 [18]. Bauman A, Bull F, Chey T, Craig CL, Ainsworth BE, Sallis JF, Bowles HR, Hagstromer M,  
32 Sjoström M, Pratt M; IPS Group. The International Prevalence Study on Physical Activity: results  
33 from 20 countries. *Int J Behav Nutr Phys Act*. 2009 Mar 31;6:21.  
34  
35 [19]. Lakerveld J, Loyen A, Schotman N, Peeters CFW, Cardon G, van der Ploeg HP, Lien N,  
36 Chastin S, Brug J. Sitting too much: A hierarchy of socio-demographic correlates. *Prev Med*. 2017  
37 Aug;101:77-83. doi: 10.1016/j.ypmed.2017.05.015.  
38  
39 [20]. Milton K, Gale J, Stamatakis E, Bauman A. Trends in prolonged sitting time among European  
40 adults: 27 country analysis. *Prev Med*. 2015 Aug;77:11-6. doi:10.1016/j.ypmed.2015.04.016.  
41  
42 [21]. World Health Organization. Global Recommendations on Physical Activity for Health .  
43 Geneva: World Health Organization, 2010.  
44  
45 [22]. 2008 Physical Activity Guidelines for Americans. Office of Disease Prevention & Health  
46  
47  
48  
49  
50  
51  
52  
53  
54  
55  
56  
57  
58  
59  
60

Promotion, US Department of Health and Human Services, October 2008.

[23] Bauman A, Ainsworth BE, Sallis JF, Hagströmer M, Craig CL, Bull FC, Pratt M, Venugopal K, Chau J, Sjöström M; IPS Group. The descriptive epidemiology of sitting. A 20-country comparison using the International Physical Activity Questionnaire (IPAQ). *Am J Prev Med.* 2011 Aug;41(2):228-35.

[24] Crespo CJ, Smit E, Andersen RE, Carter-Pokras O, Ainsworth BE. Race/ethnicity, social class and their relation to physical inactivity during leisure time: results from the Third National Health and Nutrition Examination Survey, 1988-1994. *Am J Prev Med.* 2000 Jan;18(1):46-53.

[25] Celis-Morales C, Salas C, Alduhishy A, Sanzana R, Martínez MA, Leiva A, Diaz X, Martínez C, Álvarez C, Leppe J, Munro CA, Siervo M, Willis ND. Socio-demographic patterns of physical activity and sedentary behaviour in Chile: results from the National Health Survey 2009-2010. *J Public Health (Oxf).* 2016 Jun;38(2):e98-e105.

[26] Liao Y, Shibata A, Ishii K, Oka K. Independent and Combined Associations of Physical Activity and Sedentary Behavior with Depressive Symptoms Among Japanese Adults. *Int J Behav Med.* 2016 Aug;23(4):402-9.



Table 1. Demographic characteristics of the participants

| Variable                               | Overall<br>(N=38515) | Physical activity     |                       |                    | P      | Sitting time per day    |                         | P      |
|----------------------------------------|----------------------|-----------------------|-----------------------|--------------------|--------|-------------------------|-------------------------|--------|
|                                        |                      | Vigorous<br>(N=11510) | Moderate<br>(N=14672) | Light<br>(N=12333) |        | ≤7.5 hours<br>(N=28270) | >7.5 hours<br>(N=10245) |        |
| Age(years), mean±SD                    | 55.65±12.14          | 55.48±10.81           | 54.62±12.05           | 57.02±13.25        | <0.001 | 55.46±11.93             | 56.17±12.68             | <0.001 |
| Sex, %(95%CI)                          |                      |                       |                       |                    | <0.001 |                         |                         | <0.001 |
| Women                                  | 60.52(60.03,61.01)   | 51.81(50.89,52.72)    | 70.90(70.16,71.63)    | 56.31(55.44,57.19) |        | 62.21(61.65,62.78)      | 55.85(54.89,56.81)      |        |
| Men                                    | 39.48(38.99,39.97)   | 48.19(47.28,49.11)    | 29.10(28.37,29.84)    | 43.69(42.81,44.56) |        | 37.79(37.22,38.35)      | 44.15(43.19,45.11)      |        |
| Marital status, %(95%CI)               |                      |                       |                       |                    | <0.001 |                         |                         | <0.001 |
| Married/cohabiting                     | 89.76(89.46,90.06)   | 91.81(91.31,92.31)    | 90.18(89.7,90.66)     | 87.35(86.76,87.94) |        | 90.21(89.86,90.56)      | 88.52(87.9,89.14)       |        |
| Widowed/single/divorce<br>d/separated  | 10.24(9.94,10.54)    | 8.19(7.69,8.69)       | 9.82(9.34,10.30)      | 12.65(12.06,13.24) |        | 9.79(9.44,10.14)        | 11.48(10.86,12.10)      |        |
| Education, %(95%CI)                    |                      |                       |                       |                    | 0.234  |                         |                         | 0.001  |
| ≤Primary school                        | 44.86(44.36,45.35)   | 44.74(43.83,45.64)    | 44.45(43.64,45.25)    | 45.46(44.58,46.34) |        | 44.33(43.75,44.91)      | 46.31(45.34,47.27)      |        |
| ≥Junior school                         | 55.14(54.65,55.64)   | 55.26(54.36,56.17)    | 55.55(54.75,56.36)    | 54.54(53.66,55.42) |        | 55.67(55.09,56.25)      | 53.69(52.73,54.66)      |        |
| Per capita monthly<br>income, %(95%CI) |                      |                       |                       |                    | <0.001 |                         |                         | <0.001 |
| ≤500RMB                                | 35.69(35.21,36.17)   | 36.22(35.34,37.10)    | 32.99(32.23,33.76)    | 38.40(37.54,39.26) |        | 34.71(34.15,35.26)      | 38.40(37.46,39.34)      |        |
| 500RMB~                                | 32.86(32.39,33.33)   | 32.35(31.50,33.21)    | 33.80(33.03,34.56)    | 32.22(31.40,33.05) |        | 34.38(33.83,34.94)      | 28.67(27.79,29.54)      |        |
| ≥1000RMB                               | 31.45(30.98,31.91)   | 31.42(30.58,32.27)    | 33.21(32.44,33.97)    | 29.38(28.57,30.18) |        | 30.91(30.37,31.45)      | 32.93(32.02,33.84)      |        |
| Smoking, %(95%CI)                      |                      |                       |                       |                    | <0.001 |                         |                         | <0.001 |
| Never                                  | 72.76(72.31,73.20)   | 66.48(65.62,67.34)    | 80.21(79.56,80.85)    | 69.76(68.95,70.57) |        | 74.03(73.52,74.54)      | 69.24(68.35,70.14)      |        |
| Light                                  | 5.59(5.36,5.82)      | 6.83(6.37,7.29)       | 4.26(3.93,4.59)       | 6.01(5.59,6.43)    |        | 5.66(5.39,5.93)         | 5.40(4.96,5.84)         |        |
| Moderate                               | 4.54(4.34,4.75)      | 5.49(5.07,5.91)       | 3.44(3.15,3.74)       | 4.97(4.59,5.35)    |        | 4.43(4.19,4.67)         | 4.86(4.44,5.28)         |        |
| Heavy                                  | 17.11(16.73,17.49)   | 21.20(20.45,21.95)    | 12.09(11.56,12.62)    | 19.27(18.57,19.96) |        | 15.88(15.46,16.31)      | 20.50(19.72,21.28)      |        |

|    |                                    |                    |                    |                    |                    |        |                    |                    |        |
|----|------------------------------------|--------------------|--------------------|--------------------|--------------------|--------|--------------------|--------------------|--------|
| 1  |                                    |                    |                    |                    |                    |        |                    |                    |        |
| 2  |                                    |                    |                    |                    |                    |        |                    |                    |        |
| 3  |                                    |                    |                    |                    |                    |        |                    |                    |        |
| 4  |                                    |                    |                    |                    |                    |        |                    |                    |        |
| 5  | Drinking, %(95%CI)                 |                    |                    |                    | <0.001             |        |                    | <0.001             |        |
| 6  | Never                              | 77.46(77.04,77.88) | 71.74(70.92,72.56) | 83.31(82.70,83.91) | 75.84(75.08,76.59) |        | 78.06(77.58,78.54) | 75.79(74.96,76.62) |        |
| 7  | Light                              | 13.92(13.57,14.26) | 17.94(17.24,18.64) | 10.39(9.90,10.89)  | 14.35(13.73,14.97) |        | 13.58(13.18,13.98) | 14.84(14.15,15.52) |        |
| 8  | Moderate                           | 4.73(4.51,4.94)    | 5.80(5.38,6.23)    | 3.64(3.34,3.94)    | 5.01(4.63,5.40)    |        | 4.78(4.53,5.03)    | 4.58(4.17,4.98)    |        |
| 9  | Heavy                              | 3.90(3.71,4.09)    | 4.52(4.14,4.90)    | 2.66(2.40,2.92)    | 4.80(4.42,5.18)    |        | 3.58(3.36,3.79)    | 4.79(4.38,5.21)    |        |
| 10 |                                    |                    |                    |                    |                    |        |                    |                    |        |
| 11 | Dietary habits                     |                    |                    |                    |                    |        |                    |                    |        |
| 12 | (Kg/Month), (mean ± SD)            |                    |                    |                    |                    |        |                    |                    |        |
| 13 |                                    |                    |                    |                    |                    |        |                    |                    |        |
| 14 | Meat and poultry                   | 1.32±1.32          | 1.21±1.28          | 1.40±1.35          | 1.33±1.33          | <0.001 | 1.31±1.33          | 1.34±1.31          | 0.410  |
| 15 | Fishery products                   | 0.11±0.16          | 0.10±0.15          | 0.12±0.16          | 0.11±0.16          | <0.001 | 0.11±0.16          | 0.13±0.17          | <0.001 |
| 16 | Vegetables and fruits              | 13.8±7.47          | 12.49±7.43         | 14.68±7.37         | 14.07±7.44         | <0.001 | 13.27±7.23         | 15.24±7.91         | <0.001 |
| 17 | Soy products                       | 0.48±0.64          | 0.41±0.60          | 0.49±0.65          | 0.53±0.67          | <0.001 | 0.49±0.65          | 0.46±0.63          | <0.001 |
| 18 |                                    |                    |                    |                    |                    |        |                    |                    |        |
| 19 | Height(cm), mean ± SD              | 159.69±8.20        | 160.65±8.24        | 158.62±7.84        | 160.07±8.43        | <0.001 | 159.59±8.17        | 159.98±8.28        | <0.001 |
| 20 | Weight(kg), mean ± SD              | 63.48±11.14        | 63.92±10.86        | 62.44±10.76        | 64.30±11.72        | <0.001 | 63.60±11.09        | 63.15±11.27        | <0.001 |
| 21 | BMI(kg/m <sup>2</sup> ), mean ± SD | 24.84±3.57         | 24.72±3.46         | 24.77±3.50         | 25.03±3.73         | <0.001 | 24.92±3.56         | 24.61±3.59         | <0.001 |
| 22 |                                    |                    |                    |                    |                    |        |                    |                    |        |
| 23 | WC(cm), mean ± SD                  | 84.07±10.41        | 83.65±10.03        | 83.44±10.19        | 85.22±10.90        | <0.001 | 84.42±10.35        | 83.10±10.50        | <0.001 |
| 24 |                                    |                    |                    |                    |                    |        |                    |                    |        |
| 25 |                                    |                    |                    |                    |                    |        |                    |                    |        |
| 26 |                                    |                    |                    |                    |                    |        |                    |                    |        |
| 27 |                                    |                    |                    |                    |                    |        |                    |                    |        |
| 28 |                                    |                    |                    |                    |                    |        |                    |                    |        |
| 29 |                                    |                    |                    |                    |                    |        |                    |                    |        |
| 30 |                                    |                    |                    |                    |                    |        |                    |                    |        |
| 31 |                                    |                    |                    |                    |                    |        |                    |                    |        |
| 32 |                                    |                    |                    |                    |                    |        |                    |                    |        |
| 33 |                                    |                    |                    |                    |                    |        |                    |                    |        |
| 34 |                                    |                    |                    |                    |                    |        |                    |                    |        |
| 35 |                                    |                    |                    |                    |                    |        |                    |                    |        |
| 36 |                                    |                    |                    |                    |                    |        |                    |                    |        |
| 37 |                                    |                    |                    |                    |                    |        |                    |                    |        |
| 38 |                                    |                    |                    |                    |                    |        |                    |                    |        |
| 39 |                                    |                    |                    |                    |                    |        |                    |                    |        |
| 40 |                                    |                    |                    |                    |                    |        |                    |                    |        |
| 41 |                                    |                    |                    |                    |                    |        |                    |                    |        |
| 42 |                                    |                    |                    |                    |                    |        |                    |                    |        |
| 43 |                                    |                    |                    |                    |                    |        |                    |                    |        |
| 44 |                                    |                    |                    |                    |                    |        |                    |                    |        |
| 45 |                                    |                    |                    |                    |                    |        |                    |                    |        |
| 46 |                                    |                    |                    |                    |                    |        |                    |                    |        |

Table 2. Association of potential risk factors for physical activity and sitting time.

| Factors                    | OR(95% CI)            |                       |                    |                    |                         |                         |
|----------------------------|-----------------------|-----------------------|--------------------|--------------------|-------------------------|-------------------------|
|                            | Physical activity     |                       |                    |                    | Sitting time per day    |                         |
|                            | Moderate <sup>a</sup> | Moderate <sup>b</sup> | Light <sup>a</sup> | Light <sup>b</sup> | >7.5 hours <sup>a</sup> | >7.5 hours <sup>b</sup> |
| Age(year)                  |                       |                       |                    |                    |                         |                         |
| 18-                        | 1.00                  | 1.00                  | 1.00               | 1.00               | 1.00                    | 1.00                    |
| 30-                        | 0.67(0.56,0.81)       | 0.70(0.58,0.85)       | 0.58(0.48,0.70)    | 0.63(0.51,0.76)    | 0.99(0.85,1.14)         | 1.04(0.89,1.22)         |
| 40-                        | 0.49(0.41,0.57)       | 0.52(0.44,0.62)       | 0.42(0.36,0.50)    | 0.47(0.39,0.56)    | 0.91(0.79,1.04)         | 0.98(0.85,1.13)         |
| 50-                        | 0.48(0.41,0.57)       | 0.52(0.44,0.61)       | 0.36(0.30,0.42)    | 0.39(0.33,0.47)    | 0.87(0.76,0.99)         | 0.94(0.82,1.09)         |
| 60-                        | 0.45(0.38,0.52)       | 0.51(0.43,0.61)       | 0.46(0.39,0.54)    | 0.51(0.43,0.62)    | 0.89(0.78,1.02)         | 0.89(0.77,1.02)         |
| 70-79                      | 0.62(0.52,0.74)       | 0.72(0.60,0.87)       | 1.13(0.95,1.35)    | 1.17(0.97,1.42)    | 1.34(1.17,1.54)         | 1.08(0.93,1.26)         |
| Gender                     |                       |                       |                    |                    |                         |                         |
| Women                      | 1.00                  | 1.00                  | 1.00               | 1.00               | 1.00                    | 1.00                    |
| Men                        | 0.44(0.42,0.46)       | 0.46(0.43,0.50)       | 0.83(0.79,0.88)    | 0.76(0.70,0.83)    | 1.30(1.24,1.36)         | 1.25(1.16,1.35)         |
| Education                  |                       |                       |                    |                    |                         |                         |
| ≤Primary school            | 1.00                  | 1.00                  | 1.00               | 1.00               | 1.00                    | 1.00                    |
| ≥Junior middle school      | 1.01(0.96,1.06)       | 1.07(1.01,1.14)       | 0.97(0.92,1.02)    | 1.27(1.20,1.35)    | 0.92(0.88,0.97)         | 0.85(0.81,0.90)         |
| Marital status             |                       |                       |                    |                    |                         |                         |
| Married/cohabiting         | 1.00                  | 1.00                  | 1.00               | 1.00               | 1.00                    | 1.00                    |
| Divorced/widowed/unmarried | 1.22(1.12,1.33)       | 1.15(1.05,1.26)       | 1.62(1.49,1.77)    | 1.19(1.09,1.31)    | 1.20(1.11,1.28)         | 1.08(1.00,1.17)         |
| Per capita monthly income  |                       |                       |                    |                    |                         |                         |
| <500 RMB                   | 1.00                  | 1.00                  | 1.00               | 1.00               | 1.00                    | 1.00                    |
| 500RMB-                    | 1.15(1.08,1.22)       | 1.16(1.09,1.23)       | 0.94(0.88,1.00)    | 1.08(1.01,1.15)    | 0.75(0.71,0.80)         | 0.79(0.75,0.84)         |
| ≥1000 RMB                  | 1.16(1.09,1.23)       | 1.13(1.06,1.21)       | 0.88(0.83,0.94)    | 1.00(0.93,1.07)    | 0.96(0.91,1.02)         | 1.01(0.95,1.07)         |
| Smoking                    |                       |                       |                    |                    |                         |                         |
| Never                      | 1.00                  | 1.00                  | 1.00               | 1.00               | 1.00                    | 1.00                    |

|                       |                 |                 |                 |                 |                 |                 |
|-----------------------|-----------------|-----------------|-----------------|-----------------|-----------------|-----------------|
| Light                 | 0.52(0.46,0.58) | 0.57(0.51,0.64) | 0.84(0.75,0.93) | 0.79(0.70,0.89) | 1.04(0.93,1.16) | 0.88(0.78,0.99) |
| Moderate              | 0.52(0.46,0.59) | 0.61(0.54,0.69) | 0.86(0.77,0.97) | 0.85(0.75,0.97) | 1.21(1.07,1.36) | 1.02(0.90,1.16) |
| Heavy                 | 0.47(0.44,0.51) | 0.57(0.52,0.61) | 0.87(0.81,0.92) | 0.83(0.77,0.90) | 1.41(1.33,1.51) | 1.20(1.10,1.31) |
| Drinking,             |                 |                 |                 |                 |                 |                 |
| Never                 | 1.00            | 1.00            | 1.00            | 1.00            | 1.00            | 1.00            |
| Light                 | 0.50(0.46,0.54) | 0.64(0.59,0.69) | 0.76(0.71,0.81) | 0.80(0.74,0.87) | 1.19(1.10,1.28) | 0.98(0.90,1.06) |
| Moderate              | 0.54(0.48,0.61) | 0.71(0.63,0.81) | 0.82(0.73,0.91) | 0.93(0.82,1.05) | 1.08(0.96,1.22) | 0.82(0.72,0.92) |
| Heavy                 | 0.51(0.44,0.58) | 0.70(0.61,0.81) | 1.01(0.89,1.13) | 1.10(0.96,1.27) | 1.31(1.16,1.48) | 1.06(0.93,1.21) |
| Dietary habits        |                 |                 |                 |                 |                 |                 |
| Meat and poultry      | 1.04(1.02,1.06) | 1.08(1.06,1.10) | 0.93(0.91,0.95) | 1.01(0.99,1.04) | 1.01(0.99,1.03) | 0.95(0.93,0.97) |
| Fishery products      | 1.16(0.99,1.34) | 0.97(0.82,1.16) | 0.61(0.52,0.72) | 0.76(0.63,0.93) | 2.16(1.86,2.52) | 2.21(1.87,2.60) |
| Vegetables and fruits | 1.01(1.01,1.01) | 1.01(1.00,1.01) | 0.97(0.97,0.97) | 0.96(0.96,0.97) | 1.04(1.03,1.04) | 1.05(1.04,1.05) |
| Soy products          | 0.91(0.88,0.94) | 0.88(0.85,0.92) | 0.74(0.71,0.77) | 0.81(0.78,0.85) | 0.91(0.87,0.95) | 0.91(0.88,0.95) |
| Sitting time per day  |                 |                 |                 |                 |                 |                 |
| ≤7.5 hours            | 1.00            | 1.00            | 1.00            | 1.00            | -               | -               |
| >7.5 hours            | 1.34(1.25,1.42) | 1.35(1.27,1.44) | 3.68(3.47,3.91) | 4.09(3.84,4.36) | -               | -               |
| Physical activity     |                 |                 |                 |                 |                 |                 |
| Vigorous              | -               | -               | -               | -               | 1.00            | 1.00            |
| Moderate              | -               | -               | -               | -               | 1.34(1.25,1.42) | 1.37(1.28,1.46) |
| Light                 | -               | -               | -               | -               | 3.68(3.47,3.91) | 4.08(3.83,4.34) |

<sup>a</sup>was a crude model;

<sup>b</sup>was a full model : adjusted for age, gender, education, marital status, per capita monthly income, smoking, drinking, and dietary habits.

**Figure Legends**

**Figure 1.** The violin chart of metabolic equivalence per week and sitting time per day according to gender and age. (a) is for metabolic equivalence per week; (b) is sitting time per day.

**Figure 2.** Changes in the age-standardized prevalence of physical activity and sitting time with aging in different gender. (a) is for light physical activity; (b) is for moderate physical activity; (c) is for vigorous physical activity. (d) is sitting time  $\leq 7.5$  hours per day; (e) is sitting time  $> 7.5$  hours per day.

**Figure 3.** The age-standardized percentage according to the cut-off points of physical activity and sitting time in different gender. (a) is for total; (b) is for men; (c) is for women.



Figure 1. The violin chart of metabolic equivalence per week and sitting time per day according to gender and age. (a) is for metabolic equivalence per week; (b) is sitting time per day.

247x161mm (600 x 600 DPI)



Figure 2. Changes in the age-standardized prevalence of physical activity and sitting time with aging in different gender. (a) is for light physical activity; (b) is for moderate physical activity; (c) is for vigorous physical activity. (d) is sitting time  $\leq 7.5$  hours per day; (e) is sitting time  $> 7.5$  hours per day.

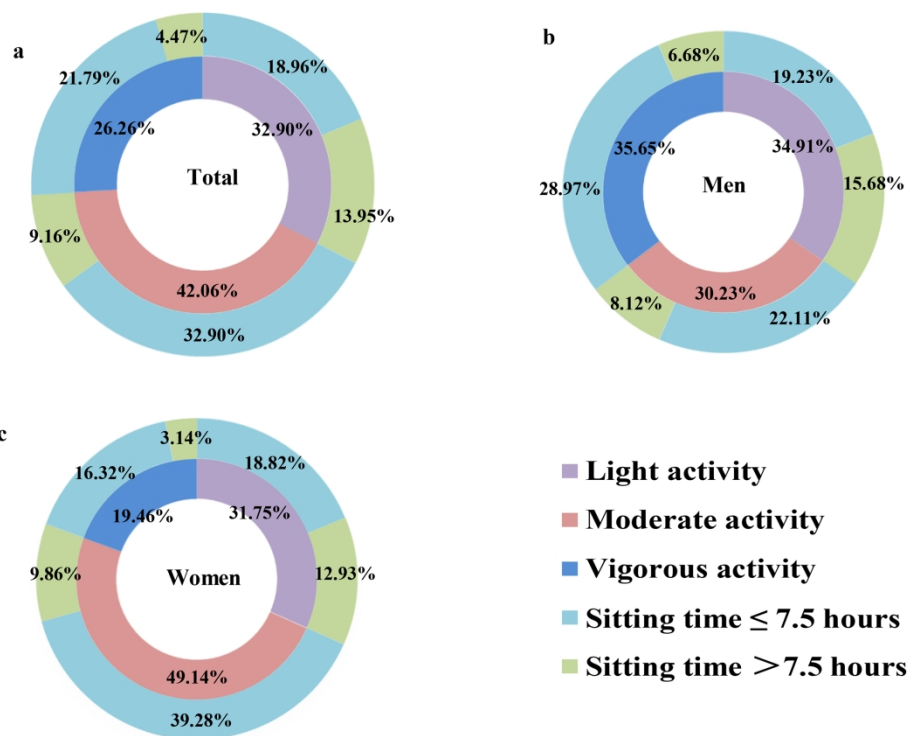

Figure 3. The age-standardized percentage according to the cut-off points of physical activity and sitting time in different gender. (a) is for total; (b) is for men; (c) is for women.

253x194mm (300 x 300 DPI)



Supplementary Table1. Demographic characteristics of the participants from WHO

| Variable                                   | Physical activity(from WHO) |                     |                                    | P      |
|--------------------------------------------|-----------------------------|---------------------|------------------------------------|--------|
|                                            | Highly active<br>(N=11341)  | Active<br>(N=11190) | Insufficiently active<br>(N=15984) |        |
| Age(years), mean $\pm$ SD                  | 55.51 $\pm$ 10.8            | 53.57 $\pm$ 11.91   | 57.2 $\pm$ 12.95                   | <0.001 |
| Sex, %(95%CI)                              |                             |                     |                                    | <0.001 |
| Women                                      | 51.01(50.09,51.93)          | 74.49(73.68,75.29)  | 57.49(56.73,58.26)                 |        |
| Men                                        | 48.99(48.07,49.91)          | 25.51(24.71,26.32)  | 42.51(41.74,43.27)                 |        |
| Marital status, %(95%CI)                   |                             |                     |                                    | <0.001 |
| Married/cohabiting                         | 91.82(91.31,92.32)          | 91.55(91.03,92.06)  | 87.05(86.53,87.57)                 |        |
| Widowed/single/divorced/separated          | 8.18(7.68,8.69)             | 8.45(7.94,8.97)     | 12.95(12.43,13.47)                 |        |
| Education, %(95%CI)                        |                             |                     |                                    | 0.234  |
| $\leq$ Primary school                      | 44.69(43.77,45.60)          | 42.67(41.76,43.59)  | 46.51(45.74,47.28)                 |        |
| $\geq$ Junior school                       | 55.31(54.40,56.23)          | 57.33(56.41,58.24)  | 53.49(52.72,54.26)                 |        |
| Per capita monthly income, %(95%CI)        |                             |                     |                                    | <0.001 |
| $\leq$ 500RMB                              | 36.24(35.36,37.12)          | 31.74(30.88,32.61)  | 38.06(37.31,38.82)                 |        |
| 500RMB~                                    | 32.39(31.53,33.25)          | 33.81(32.93,34.68)  | 32.54(31.81,33.27)                 |        |
| $\geq$ 1000RMB                             | 31.37(30.52,32.23)          | 34.45(33.57,35.33)  | 29.40(28.69,30.10)                 |        |
| Smoking, %(95%CI)                          |                             |                     |                                    | <0.001 |
| Never                                      | 65.89(65.02,66.77)          | 82.70(82.00,83.40)  | 70.67(69.96,71.38)                 |        |
| Light                                      | 6.90(6.43,7.36)             | 3.88(3.52,4.24)     | 5.86(5.49,6.22)                    |        |
| Moderate                                   | 5.59(5.17,6.01)             | 3.07(2.75,3.39)     | 4.83(4.50,5.16)                    |        |
| Heavy                                      | 21.62(20.86,22.38)          | 10.35(9.78,10.91)   | 18.64(18.04,19.25)                 |        |
| Drinking, %(95%CI)                         |                             |                     |                                    | <0.001 |
| Never                                      | 71.33(70.50,72.17)          | 84.84(84.18,85.51)  | 76.63(75.98,77.29)                 |        |
| Light                                      | 18.13(17.42,18.84)          | 9.30(8.76,9.84)     | 14.16(13.62,14.70)                 |        |
| Moderate                                   | 5.93(5.50,6.37)             | 3.35(3.02,3.68)     | 4.83(4.50,5.16)                    |        |
| Heavy                                      | 4.60(4.22,4.99)             | 2.50(2.21,2.79)     | 4.38(4.06,4.70)                    |        |
| Dietary habits (Kg/Month), (mean $\pm$ SD) |                             |                     |                                    |        |
| Meat and poultry                           | 1.34 $\pm$ 1.33             | 1.42 $\pm$ 1.34     | 1.23 $\pm$ 1.3                     | <0.001 |
| Fishery products                           | 0.11 $\pm$ 0.16             | 0.12 $\pm$ 0.16     | 0.1 $\pm$ 0.16                     | <0.001 |
| Vegetables and fruits                      | 14.06 $\pm$ 7.44            | 14.7 $\pm$ 7.33     | 12.98 $\pm$ 7.5                    | <0.001 |
| Soy products                               | 0.53 $\pm$ 0.67             | 0.5 $\pm$ 0.64      | 0.43 $\pm$ 0.62                    | <0.001 |
| Height(cm), mean $\pm$ SD                  | 160.73 $\pm$ 8.26           | 158.43 $\pm$ 7.71   | 159.83 $\pm$ 8.37                  | <0.001 |
| Weight(kg), mean $\pm$ SD                  | 63.97 $\pm$ 10.89           | 62.43 $\pm$ 10.71   | 63.87 $\pm$ 11.54                  | <0.001 |
| BMI(kg/m <sup>2</sup> ), mean $\pm$ SD     | 24.71 $\pm$ 3.46            | 24.82 $\pm$ 3.5     | 24.94 $\pm$ 3.68                   | <0.001 |
| WC(cm), mean $\pm$ SD                      | 83.65 $\pm$ 10.04           | 83.46 $\pm$ 10.18   | 84.8 $\pm$ 10.76                   | <0.001 |

Supplementary Table 2. Prevalence of physical activity and sitting time about various characteristics

| Variable                              | Physical activity     |                       |                    | <i>P</i> | Sitting time per day    |                         | <i>P</i> |
|---------------------------------------|-----------------------|-----------------------|--------------------|----------|-------------------------|-------------------------|----------|
|                                       | Vigorous<br>(N=11510) | Moderate<br>(N=14672) | Light<br>(N=12333) |          | ≤7.5 hours<br>(N=29270) | >7.5 hours<br>(N=10245) |          |
| Age, n (%)                            |                       |                       |                    | <0.001   |                         |                         | <0.001   |
| 18~                                   | 220(17.49)            | 558(44.36)            | 480(38.16)         |          | 910(72.34)              | 348(27.66)              |          |
| 30~                                   | 685(25.19)            | 1172(43.10)           | 862(31.70)         |          | 1975(72.64)             | 744(27.36)              |          |
| 40~                                   | 2275(31.71)           | 2807(39.13)           | 2092(29.16)        |          | 5327(74.25)             | 1847(25.75)             |          |
| 50~                                   | 3539(33.36)           | 4320(40.73)           | 2748(25.91)        |          | 7965(75.09)             | 2642(24.91)             |          |
| 60~                                   | 3861(31.99)           | 4358(36.11)           | 3849(31.89)        |          | 8996(74.54)             | 3072(25.46)             |          |
| 70~79                                 | 930(19.83)            | 1457(31.07)           | 2302(49.09)        |          | 3097(66.05)             | 1592(33.95)             |          |
| Sex, n (%)                            |                       |                       |                    | <0.001   |                         |                         | <0.001   |
| Women                                 | 5963(25.58)           | 10402(44.62)          | 6945(29.79)        |          | 17588(75.45)            | 5722(24.55)             |          |
| Men                                   | 5547(36.48)           | 4270(28.08)           | 5388(35.44)        |          | 10682(70.25)            | 4523(29.75)             |          |
| Marital status, n (%)                 |                       |                       |                    | <0.001   |                         |                         | <0.001   |
| Married/cohabiting                    | 10567(30.57)          | 13231(38.27)          | 10773(31.16)       |          | 25502(73.77)            | 9069(26.23)             |          |
| Widowed/single/<br>divorced/separated | 943(23.91)            | 1441(36.54)           | 1560(39.55)        |          | 2768(70.18)             | 1176(29.82)             |          |
| Education, n (%)                      |                       |                       |                    | 0.234    |                         |                         | 0.001    |
| ≤Primary school                       | 5149(29.81)           | 6521(37.74)           | 5607(32.45)        |          | 12533(72.54)            | 4744(27.46)             |          |
| ≥Junior school                        | 6361(29.95)           | 8151(38.38)           | 6726(31.67)        |          | 15737(74.10)            | 5501(25.90)             |          |
| Per capita monthly<br>income, n (%)   |                       |                       |                    | <0.001   |                         |                         | <0.001   |
| ≤500RMB                               | 4169(30.33)           | 4841(35.22)           | 4736(34.45)        |          | 9812(71.38)             | 3934(28.62)             |          |
| 500RMB~                               | 3724(29.42)           | 4959(39.18)           | 3974(31.40)        |          | 9720(76.80)             | 2937(23.20)             |          |
| ≥1000RMB                              | 3617(29.86)           | 4872(40.23)           | 3623(29.91)        |          | 8738(72.14)             | 3374(27.86)             |          |
| Smoking, n (%)                        |                       |                       |                    | <0.001   |                         |                         | <0.001   |
| Never                                 | 7652(27.31)           | 11768(41.99)          | 8603(30.70)        |          | 20929(74.69)            | 7094(25.31)             |          |
| Light                                 | 786(36.52)            | 625(29.04)            | 741(34.43)         |          | 1599(74.30)             | 553(25.70)              |          |
| Moderate                              | 632(36.11)            | 505(28.86)            | 613(35.03)         |          | 1252(71.54)             | 498(28.46)              |          |
| Heavy                                 | 2440(37.03)           | 1774(26.92)           | 2376(36.05)        |          | 4490(68.13)             | 2100(31.87)             |          |
| Drinking, n (%)                       |                       |                       |                    | <0.001   |                         |                         | <0.001   |
| Never                                 | 8257(27.68)           | 12223(40.97)          | 9353(31.35)        |          | 22068(73.97)            | 7765(26.03)             |          |
| Light                                 | 2065(38.53)           | 1525(28.45)           | 1770(33.02)        |          | 3840(71.64)             | 1520(28.36)             |          |
| Moderate                              | 668(36.70)            | 534(29.34)            | 618(33.96)         |          | 1351(74.23)             | 469(25.77)              |          |
| Heavy                                 | 520(34.62)            | 390(25.97)            | 592(39.41)         |          | 1011(67.31)             | 491(32.69)              |          |

**Supplementary Table 3. Association of potential risk factors for physical activity and sitting time from WHO.**

| Factors                          | Physical activity from WHO |                     |                                    |                                    |
|----------------------------------|----------------------------|---------------------|------------------------------------|------------------------------------|
|                                  | Active <sup>a</sup>        | Active <sup>b</sup> | Insufficiently active <sup>a</sup> | Insufficiently active <sup>b</sup> |
| <b>Age(year)</b>                 |                            |                     |                                    |                                    |
| 18-                              | 1.00                       | 1.00                | 1.00                               | 1.00                               |
| 30-                              | 0.67(0.55,0.80)            | 0.57(0.47,0.70)     | 0.64(0.53,0.76)                    | 0.70(0.58,0.85)                    |
| 40-                              | 0.44(0.37,0.52)            | 0.48(0.40,0.59)     | 0.48(0.40,0.56)                    | 0.54(0.46,0.65)                    |
| 50-                              | 0.45(0.38,0.54)            | 0.50(0.42,0.59)     | 0.41(0.35,0.49)                    | 0.47(0.40,0.56)                    |
| 60-                              | 0.37(0.31,0.44)            | 0.48(0.40,0.57)     | 0.53(0.45,0.62)                    | 0.63(0.53,0.75)                    |
| 70-79                            | 0.41(0.34,0.49)            | 0.69(0.57,0.83)     | 1.26(1.06,1.50)                    | 1.43(1.19,1.72)                    |
| <b>Gender</b>                    |                            |                     |                                    |                                    |
| Women                            | 1.00                       | 1.00                | 1.00                               | 1.00                               |
| Men                              | 0.36(0.34,0.38)            | 0.37(0.34,0.40)     | 0.77(0.74,0.81)                    | 0.74(0.69,0.79)                    |
| <b>Education</b>                 |                            |                     |                                    |                                    |
| ≤Primary school                  | 1.00                       | 1.00                | 1.00                               | 1.00                               |
| ≥Junior middle school            | 1.09(1.03,1.14)            | 1.19(1.12,1.26)     | 0.93(0.89,0.98)                    | 1.21(1.14,1.28)                    |
| <b>Marital status</b>            |                            |                     |                                    |                                    |
| Married/cohabiting               | 1.00                       | 1.00                | 1.00                               | 1.00                               |
| Divorced/widowed/unmarried       | 1.04(0.94,1.14)            | 1.14(1.03,1.26)     | 1.67(1.54,1.82)                    | 1.51(1.39,1.65)                    |
| <b>Per capita monthly income</b> |                            |                     |                                    |                                    |
| <500 RMB                         | 1.00                       | 1.00                | 1.00                               | 1.00                               |
| 500RMB-                          | 1.19(1.12,1.27)            | 1.12(1.05,1.20)     | 0.96(0.90,1.01)                    | 1.05(0.99,1.11)                    |
| ≥1000 RMB                        | 1.25(1.18,1.34)            | 1.14(1.06,1.22)     | 0.89(0.84,0.95)                    | 0.98(0.92,1.04)                    |
| <b>Smoking</b>                   |                            |                     |                                    |                                    |
| Never                            | 1.00                       | 1.00                | 1.00                               | 1.00                               |
| Light                            | 0.45(0.40,0.51)            | 0.89(0.80,1.00)     | 0.79(0.72,0.88)                    | 1.02(0.91,1.15)                    |
| Moderate                         | 0.44(0.38,0.50)            | 0.98(0.84,1.14)     | 0.81(0.72,0.90)                    | 1.00(0.88,1.13)                    |
| Heavy                            | 0.38(0.35,0.41)            | 0.89(0.80,1.00)     | 0.80(0.76,0.86)                    | 0.92(0.84,1.00)                    |
| <b>Drinking,</b>                 |                            |                     |                                    |                                    |
| Never                            | 1.00                       | 1.00                | 1.00                               | 1.00                               |
| Light                            | 0.43(0.40,0.47)            | 0.78(0.71,0.85)     | 0.73(0.68,0.78)                    | 0.87(0.80,0.94)                    |
| Moderate                         | 0.48(0.42,0.54)            | 0.90(0.78,1.03)     | 0.76(0.68,0.84)                    | 0.96(0.85,1.08)                    |
| Heavy                            | 0.46(0.39,0.53)            | 0.88(0.75,1.04)     | 0.89(0.79,1.00)                    | 1.04(0.91,1.18)                    |
| <b>Dietary habits</b>            |                            |                     |                                    |                                    |
| Meat and poultry                 | 1.05(1.03,1.07)            | 1.09(1.07,1.12)     | 0.94(0.92,0.96)                    | 1.02(1.00,1.04)                    |
| Fishery products                 | 1.25(1.06,1.46)            | 1.09(0.91,1.32)     | 0.65(0.56,0.76)                    | 0.87(0.73,1.04)                    |
| Vegetables and fruits            | 1.01(1.01,1.01)            | 1.01(1.00,1.01)     | 0.98(0.98,0.98)                    | 0.97(0.97,0.97)                    |
| Soy products                     | 0.91(0.88,0.96)            | 0.87(0.84,0.91)     | 0.77(0.74,0.80)                    | 0.83(0.80,0.86)                    |
| <b>Sitting time per day</b>      |                            |                     |                                    |                                    |
| ≤7.5 hours                       | 1.00                       | 1.00                | 1.00                               | 1.00                               |
| >7.5 hours                       | 1.14(1.07,1.22)            | 1.18(1.10,1.27)     | 3.22(3.03,3.41)                    | 3.53(3.32,3.75)                    |

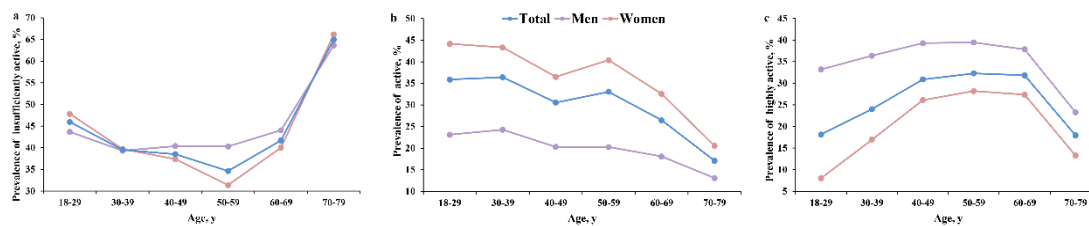

Supplementary Figure 1. Changes in the age-standardized prevalence of physical activity according to WHO with aging in different gender. (a) is for insufficiently active; (b) is for active; (c) is for highly active.

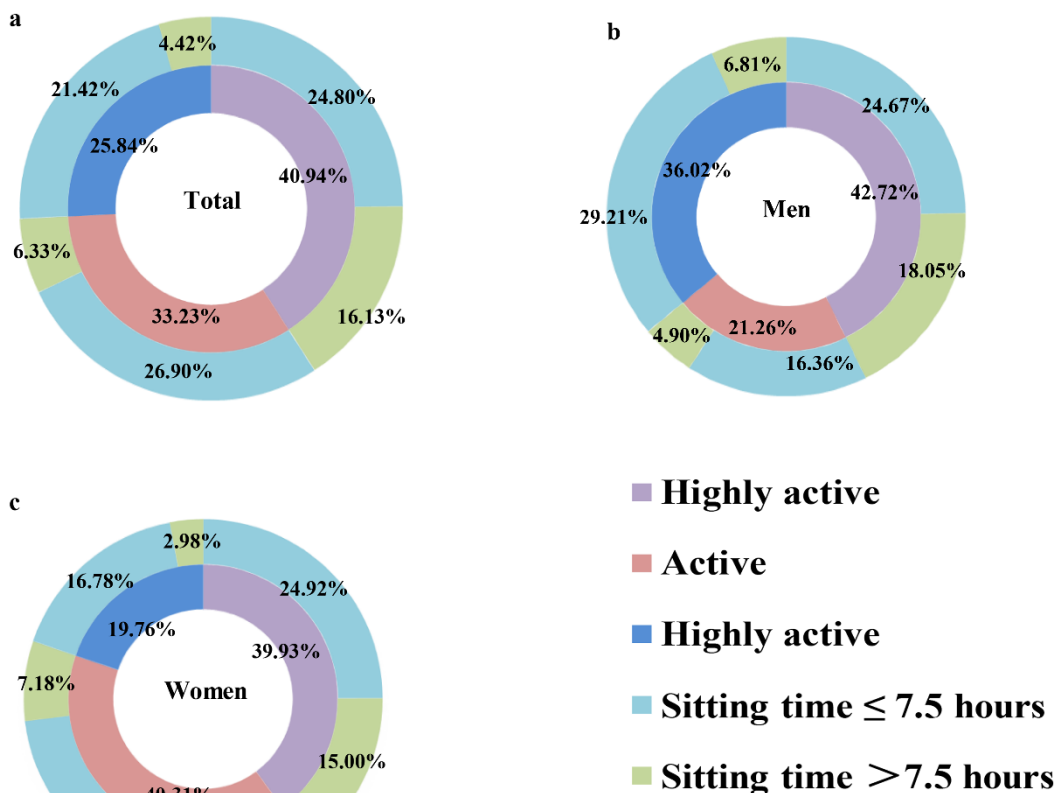

Supplementary Figure 2. The age-standardized percentage according to the cut-off points of physical activity from WHO and sitting time in different gender. (a) is for total; (b) is for men; (c) is for women.

**STROBE 2007 (v4) Statement—Checklist of items that should be included in reports of *cross-sectional studies***

| Section/Topic                | Item # | Recommendation                                                                                                                                                                       | Reported on page # |
|------------------------------|--------|--------------------------------------------------------------------------------------------------------------------------------------------------------------------------------------|--------------------|
| <b>Title and abstract</b>    | 1      | (a) Indicate the study's design with a commonly used term in the title or the abstract                                                                                               | P1                 |
|                              |        | (b) Provide in the abstract an informative and balanced summary of what was done and what was found                                                                                  | P2                 |
| <b>Introduction</b>          |        |                                                                                                                                                                                      |                    |
| Background/rationale         | 2      | Explain the scientific background and rationale for the investigation being reported                                                                                                 | P4                 |
| Objectives                   | 3      | State specific objectives, including any prespecified hypotheses                                                                                                                     | P4                 |
| <b>Methods</b>               |        |                                                                                                                                                                                      |                    |
| Study design                 | 4      | Present key elements of study design early in the paper                                                                                                                              | P4, P5             |
| Setting                      | 5      | Describe the setting, locations, and relevant dates, including periods of recruitment, exposure, follow-up, and data collection                                                      | P4, P5             |
| Participants                 | 6      | (a) Give the eligibility criteria, and the sources and methods of selection of participants                                                                                          | P4, P5             |
| Variables                    | 7      | Clearly define all outcomes, exposures, predictors, potential confounders, and effect modifiers. Give diagnostic criteria, if applicable                                             | P5, P6             |
| Data sources/<br>measurement | 8*     | For each variable of interest, give sources of data and details of methods of assessment (measurement). Describe comparability of assessment methods if there is more than one group | P5, P6             |
| Bias                         | 9      | Describe any efforts to address potential sources of bias                                                                                                                            | P6                 |
| Study size                   | 10     | Explain how the study size was arrived at                                                                                                                                            | P4                 |
| Quantitative variables       | 11     | Explain how quantitative variables were handled in the analyses. If applicable, describe which groupings were chosen and why                                                         |                    |
| Statistical methods          | 12     | (a) Describe all statistical methods, including those used to control for confounding                                                                                                | P6                 |
|                              |        | (b) Describe any methods used to examine subgroups and interactions                                                                                                                  | P6                 |
|                              |        | (c) Explain how missing data were addressed                                                                                                                                          | P4                 |
|                              |        | (d) If applicable, describe analytical methods taking account of sampling strategy                                                                                                   | P4                 |
|                              |        | (e) Describe any sensitivity analyses                                                                                                                                                |                    |
| <b>Results</b>               |        |                                                                                                                                                                                      |                    |

|                          |     |                                                                                                                                                                                                              |         |
|--------------------------|-----|--------------------------------------------------------------------------------------------------------------------------------------------------------------------------------------------------------------|---------|
| Participants             | 13* | (a) Report numbers of individuals at each stage of study—eg numbers potentially eligible, examined for eligibility, confirmed eligible, included in the study, completing follow-up, and analysed            | P4      |
|                          |     | (b) Give reasons for non-participation at each stage                                                                                                                                                         | P4      |
|                          |     | (c) Consider use of a flow diagram                                                                                                                                                                           |         |
| Descriptive data         | 14* | (a) Give characteristics of study participants (eg demographic, clinical, social) and information on exposures and potential confounders                                                                     | P5      |
|                          |     | (b) Indicate number of participants with missing data for each variable of interest                                                                                                                          | P5      |
| Outcome data             | 15* | Report numbers of outcome events or summary measures                                                                                                                                                         | P4      |
| Main results             | 16  | (a) Give unadjusted estimates and, if applicable, confounder-adjusted estimates and their precision (eg, 95% confidence interval). Make clear which confounders were adjusted for and why they were included | P7, P8  |
|                          |     | (b) Report category boundaries when continuous variables were categorized                                                                                                                                    | P8      |
|                          |     | (c) If relevant, consider translating estimates of relative risk into absolute risk for a meaningful time period                                                                                             |         |
| Other analyses           | 17  | Report other analyses done—eg analyses of subgroups and interactions, and sensitivity analyses                                                                                                               | P8      |
| <b>Discussion</b>        |     |                                                                                                                                                                                                              |         |
| Key results              | 18  | Summarise key results with reference to study objectives                                                                                                                                                     | P9, P10 |
| Limitations              | 19  | Discuss limitations of the study, taking into account sources of potential bias or imprecision. Discuss both direction and magnitude of any potential bias                                                   | P10     |
| Interpretation           | 20  | Give a cautious overall interpretation of results considering objectives, limitations, multiplicity of analyses, results from similar studies, and other relevant evidence                                   | P10     |
| Generalisability         | 21  | Discuss the generalisability (external validity) of the study results                                                                                                                                        | P10     |
| <b>Other information</b> |     |                                                                                                                                                                                                              |         |
| Funding                  | 22  | Give the source of funding and the role of the funders for the present study and, if applicable, for the original study on which the present article is based                                                | P11     |

\*Give information separately for cases and controls in case-control studies and, if applicable, for exposed and unexposed groups in cohort and cross-sectional studies.

**Note:** An Explanation and Elaboration article discusses each checklist item and gives methodological background and published examples of transparent reporting. The STROBE checklist is best used in conjunction with this article (freely available on the Web sites of PLoS Medicine at <http://www.plosmedicine.org/>, Annals of Internal Medicine at <http://www.annals.org/>, and Epidemiology at <http://www.epidem.com/>). Information on the STROBE Initiative is available at [www.strobe-statement.org](http://www.strobe-statement.org).
