# Supplementary material for: The prevalence and influencing factors of physical activity and sedentary behaviour in the rural population in China: the Henan Rural Cohort Study
Source: PubMed Central journal article supplement — BMJ Open. 2019 Sep 3;9(9):e029590. doi: 10.1136/bmjopen-2019-029590 (PMC6731809; doi:10.1136/bmjopen-2019-029590), 2019-09-03
Supplement: bmjopen-2019-029590supp001.pdf [file bmjopen-2019-029590supp001.pdf]

Supplementary Table1. Demographic characteristics of the participants from WHO

| Variable                               | Physical activity(from WHO) |                     |                                    | P      |
|----------------------------------------|-----------------------------|---------------------|------------------------------------|--------|
|                                        | Highly active<br>(N=11341)  | Active<br>(N=11190) | Insufficiently active<br>(N=15984) |        |
| Age(years), mean±SD                    | 55.51±10.8                  | 53.57±11.91         | 57.2±12.95                         | <0.001 |
| Sex, %(95%CI)                          |                             |                     |                                    | <0.001 |
| Women                                  | 51.01(50.09,51.93)          | 74.49(73.68,75.29)  | 57.49(56.73,58.26)                 |        |
| Men                                    | 48.99(48.07,49.91)          | 25.51(24.71,26.32)  | 42.51(41.74,43.27)                 |        |
| Marital status, %(95%CI)               |                             |                     |                                    | <0.001 |
| Married/cohabiting                     | 91.82(91.31,92.32)          | 91.55(91.03,92.06)  | 87.05(86.53,87.57)                 |        |
| Widowed/single/divorced/separated      | 8.18(7.68,8.69)             | 8.45(7.94,8.97)     | 12.95(12.43,13.47)                 |        |
| Education, %(95%CI)                    |                             |                     |                                    | 0.234  |
| ≤Primary school                        | 44.69(43.77,45.60)          | 42.67(41.76,43.59)  | 46.51(45.74,47.28)                 |        |
| ≥Junior school                         | 55.31(54.40,56.23)          | 57.33(56.41,58.24)  | 53.49(52.72,54.26)                 |        |
| Per capita monthly income, %(95%CI)    |                             |                     |                                    | <0.001 |
| ≤500RMB                                | 36.24(35.36,37.12)          | 31.74(30.88,32.61)  | 38.06(37.31,38.82)                 |        |
| 500RMB~                                | 32.39(31.53,33.25)          | 33.81(32.93,34.68)  | 32.54(31.81,33.27)                 |        |
| ≥1000RMB                               | 31.37(30.52,32.23)          | 34.45(33.57,35.33)  | 29.40(28.69,30.10)                 |        |
| Smoking, %(95%CI)                      |                             |                     |                                    | <0.001 |
| Never                                  | 65.89(65.02,66.77)          | 82.70(82.00,83.40)  | 70.67(69.96,71.38)                 |        |
| Light                                  | 6.90(6.43,7.36)             | 3.88(3.52,4.24)     | 5.86(5.49,6.22)                    |        |
| Moderate                               | 5.59(5.17,6.01)             | 3.07(2.75,3.39)     | 4.83(4.50,5.16)                    |        |
| Heavy                                  | 21.62(20.86,22.38)          | 10.35(9.78,10.91)   | 18.64(18.04,19.25)                 |        |
| Drinking, %(95%CI)                     |                             |                     |                                    | <0.001 |
| Never                                  | 71.33(70.50,72.17)          | 84.84(84.18,85.51)  | 76.63(75.98,77.29)                 |        |
| Light                                  | 18.13(17.42,18.84)          | 9.30(8.76,9.84)     | 14.16(13.62,14.70)                 |        |
| Moderate                               | 5.93(5.50,6.37)             | 3.35(3.02,3.68)     | 4.83(4.50,5.16)                    |        |
| Heavy                                  | 4.60(4.22,4.99)             | 2.50(2.21,2.79)     | 4.38(4.06,4.70)                    |        |
| Dietary habits (Kg/Month), (mean ± SD) |                             |                     |                                    |        |
| Meat and poultry                       | 1.34±1.33                   | 1.42±1.34           | 1.23±1.3                           | <0.001 |
| Fishery products                       | 0.11±0.16                   | 0.12±0.16           | 0.1±0.16                           | <0.001 |
| Vegetables and fruits                  | 14.06±7.44                  | 14.7±7.33           | 12.98±7.5                          | <0.001 |
| Soy products                           | 0.53±0.67                   | 0.5±0.64            | 0.43±0.62                          | <0.001 |
| Height(cm), mean ± SD                  | 160.73±8.26                 | 158.43±7.71         | 159.83±8.37                        | <0.001 |
| Weight(kg), mean ± SD                  | 63.97±10.89                 | 62.43±10.71         | 63.87±11.54                        | <0.001 |
| BMI(kg/m <sup>2</sup> ), mean ± SD     | 24.71±3.46                  | 24.82±3.5           | 24.94±3.68                         | <0.001 |
| WC(cm), mean ± SD                      | 83.65±10.04                 | 83.46±10.18         | 84.8±10.76                         | <0.001 |

Supplementary Table 2. Prevalence of physical activity and sitting time about various characteristics

| Variable                              | Physical activity     |                       |                    | P      | Sitting time per day    |                         | P      |
|---------------------------------------|-----------------------|-----------------------|--------------------|--------|-------------------------|-------------------------|--------|
|                                       | Vigorous<br>(N=11510) | Moderate<br>(N=14672) | Light<br>(N=12333) |        | ≤7.5 hours<br>(N=29270) | >7.5 hours<br>(N=10245) |        |
| Age, n (%)                            |                       |                       |                    | <0.001 |                         |                         | <0.001 |
| 18~                                   | 220(17.49)            | 558(44.36)            | 480(38.16)         |        | 910(72.34)              | 348(27.66)              |        |
| 30~                                   | 685(25.19)            | 1172(43.10)           | 862(31.70)         |        | 1975(72.64)             | 744(27.36)              |        |
| 40~                                   | 2275(31.71)           | 2807(39.13)           | 2092(29.16)        |        | 5327(74.25)             | 1847(25.75)             |        |
| 50~                                   | 3539(33.36)           | 4320(40.73)           | 2748(25.91)        |        | 7965(75.09)             | 2642(24.91)             |        |
| 60~                                   | 3861(31.99)           | 4358(36.11)           | 3849(31.89)        |        | 8996(74.54)             | 3072(25.46)             |        |
| 70~79                                 | 930(19.83)            | 1457(31.07)           | 2302(49.09)        |        | 3097(66.05)             | 1592(33.95)             |        |
| Sex, n (%)                            |                       |                       |                    | <0.001 |                         |                         | <0.001 |
| Women                                 | 5963(25.58)           | 10402(44.62)          | 6945(29.79)        |        | 17588(75.45)            | 5722(24.55)             |        |
| Men                                   | 5547(36.48)           | 4270(28.08)           | 5388(35.44)        |        | 10682(70.25)            | 4523(29.75)             |        |
| Marital status, n (%)                 |                       |                       |                    | <0.001 |                         |                         | <0.001 |
| Married/cohabiting                    | 10567(30.57)          | 13231(38.27)          | 10773(31.16)       |        | 25502(73.77)            | 9069(26.23)             |        |
| Widowed/single/<br>divorced/separated | 943(23.91)            | 1441(36.54)           | 1560(39.55)        |        | 2768(70.18)             | 1176(29.82)             |        |
| Education, n (%)                      |                       |                       |                    | 0.234  |                         |                         | 0.001  |
| ≤Primary school                       | 5149(29.81)           | 6521(37.74)           | 5607(32.45)        |        | 12533(72.54)            | 4744(27.46)             |        |
| ≥Junior school                        | 6361(29.95)           | 8151(38.38)           | 6726(31.67)        |        | 15737(74.10)            | 5501(25.90)             |        |
| Per capita monthly<br>income, n (%)   |                       |                       |                    | <0.001 |                         |                         | <0.001 |
| ≤500RMB                               | 4169(30.33)           | 4841(35.22)           | 4736(34.45)        |        | 9812(71.38)             | 3934(28.62)             |        |
| 500RMB~                               | 3724(29.42)           | 4959(39.18)           | 3974(31.40)        |        | 9720(76.80)             | 2937(23.20)             |        |
| ≥1000RMB                              | 3617(29.86)           | 4872(40.23)           | 3623(29.91)        |        | 8738(72.14)             | 3374(27.86)             |        |
| Smoking, n (%)                        |                       |                       |                    | <0.001 |                         |                         | <0.001 |
| Never                                 | 7652(27.31)           | 11768(41.99)          | 8603(30.70)        |        | 20929(74.69)            | 7094(25.31)             |        |
| Light                                 | 786(36.52)            | 625(29.04)            | 741(34.43)         |        | 1599(74.30)             | 553(25.70)              |        |
| Moderate                              | 632(36.11)            | 505(28.86)            | 613(35.03)         |        | 1252(71.54)             | 498(28.46)              |        |
| Heavy                                 | 2440(37.03)           | 1774(26.92)           | 2376(36.05)        |        | 4490(68.13)             | 2100(31.87)             |        |
| Drinking, n (%)                       |                       |                       |                    | <0.001 |                         |                         | <0.001 |
| Never                                 | 8257(27.68)           | 12223(40.97)          | 9353(31.35)        |        | 22068(73.97)            | 7765(26.03)             |        |
| Light                                 | 2065(38.53)           | 1525(28.45)           | 1770(33.02)        |        | 3840(71.64)             | 1520(28.36)             |        |
| Moderate                              | 668(36.70)            | 534(29.34)            | 618(33.96)         |        | 1351(74.23)             | 469(25.77)              |        |
| Heavy                                 | 520(34.62)            | 390(25.97)            | 592(39.41)         |        | 1011(67.31)             | 491(32.69)              |        |

**Supplementary Table 3. Association of potential risk factors for physical activity and sitting time from WHO.**

| Factors                          | Physical activity from WHO |                     |                                    |                                    |
|----------------------------------|----------------------------|---------------------|------------------------------------|------------------------------------|
|                                  | Active <sup>a</sup>        | Active <sup>b</sup> | Insufficiently active <sup>a</sup> | Insufficiently active <sup>b</sup> |
| <b>Age(year)</b>                 |                            |                     |                                    |                                    |
| 18-                              | 1.00                       | 1.00                | 1.00                               | 1.00                               |
| 30-                              | 0.67(0.55,0.80)            | 0.57(0.47,0.70)     | 0.64(0.53,0.76)                    | 0.70(0.58,0.85)                    |
| 40-                              | 0.44(0.37,0.52)            | 0.48(0.40,0.59)     | 0.48(0.40,0.56)                    | 0.54(0.46,0.65)                    |
| 50-                              | 0.45(0.38,0.54)            | 0.50(0.42,0.59)     | 0.41(0.35,0.49)                    | 0.47(0.40,0.56)                    |
| 60-                              | 0.37(0.31,0.44)            | 0.48(0.40,0.57)     | 0.53(0.45,0.62)                    | 0.63(0.53,0.75)                    |
| 70-79                            | 0.41(0.34,0.49)            | 0.69(0.57,0.83)     | 1.26(1.06,1.50)                    | 1.43(1.19,1.72)                    |
| <b>Gender</b>                    |                            |                     |                                    |                                    |
| Women                            | 1.00                       | 1.00                | 1.00                               | 1.00                               |
| Men                              | 0.36(0.34,0.38)            | 0.37(0.34,0.40)     | 0.77(0.74,0.81)                    | 0.74(0.69,0.79)                    |
| <b>Education</b>                 |                            |                     |                                    |                                    |
| ≤Primary school                  | 1.00                       | 1.00                | 1.00                               | 1.00                               |
| ≥Junior middle school            | 1.09(1.03,1.14)            | 1.19(1.12,1.26)     | 0.93(0.89,0.98)                    | 1.21(1.14,1.28)                    |
| <b>Marital status</b>            |                            |                     |                                    |                                    |
| Married/cohabiting               | 1.00                       | 1.00                | 1.00                               | 1.00                               |
| Divorced/widowed/unmarried       | 1.04(0.94,1.14)            | 1.14(1.03,1.26)     | 1.67(1.54,1.82)                    | 1.51(1.39,1.65)                    |
| <b>Per capita monthly income</b> |                            |                     |                                    |                                    |
| <500 RMB                         | 1.00                       | 1.00                | 1.00                               | 1.00                               |
| 500RMB-                          | 1.19(1.12,1.27)            | 1.12(1.05,1.20)     | 0.96(0.90,1.01)                    | 1.05(0.99,1.11)                    |
| ≥1000 RMB                        | 1.25(1.18,1.34)            | 1.14(1.06,1.22)     | 0.89(0.84,0.95)                    | 0.98(0.92,1.04)                    |
| <b>Smoking</b>                   |                            |                     |                                    |                                    |
| Never                            | 1.00                       | 1.00                | 1.00                               | 1.00                               |
| Light                            | 0.45(0.40,0.51)            | 0.89(0.80,1.00)     | 0.79(0.72,0.88)                    | 1.02(0.91,1.15)                    |
| Moderate                         | 0.44(0.38,0.50)            | 0.98(0.84,1.14)     | 0.81(0.72,0.90)                    | 1.00(0.88,1.13)                    |
| Heavy                            | 0.38(0.35,0.41)            | 0.89(0.80,1.00)     | 0.80(0.76,0.86)                    | 0.92(0.84,1.00)                    |
| <b>Drinking,</b>                 |                            |                     |                                    |                                    |
| Never                            | 1.00                       | 1.00                | 1.00                               | 1.00                               |
| Light                            | 0.43(0.40,0.47)            | 0.78(0.71,0.85)     | 0.73(0.68,0.78)                    | 0.87(0.80,0.94)                    |
| Moderate                         | 0.48(0.42,0.54)            | 0.90(0.78,1.03)     | 0.76(0.68,0.84)                    | 0.96(0.85,1.08)                    |
| Heavy                            | 0.46(0.39,0.53)            | 0.88(0.75,1.04)     | 0.89(0.79,1.00)                    | 1.04(0.91,1.18)                    |
| <b>Dietary habits</b>            |                            |                     |                                    |                                    |
| Meat and poultry                 | 1.05(1.03,1.07)            | 1.09(1.07,1.12)     | 0.94(0.92,0.96)                    | 1.02(1.00,1.04)                    |
| Fishery products                 | 1.25(1.06,1.46)            | 1.09(0.91,1.32)     | 0.65(0.56,0.76)                    | 0.87(0.73,1.04)                    |
| Vegetables and fruits            | 1.01(1.01,1.01)            | 1.01(1.00,1.01)     | 0.98(0.98,0.98)                    | 0.97(0.97,0.97)                    |
| Soy products                     | 0.91(0.88,0.96)            | 0.87(0.84,0.91)     | 0.77(0.74,0.80)                    | 0.83(0.80,0.86)                    |
| <b>Sitting time per day</b>      |                            |                     |                                    |                                    |
| ≤7.5 hours                       | 1.00                       | 1.00                | 1.00                               | 1.00                               |
| >7.5 hours                       | 1.14(1.07,1.22)            | 1.18(1.10,1.27)     | 3.22(3.03,3.41)                    | 3.53(3.32,3.75)                    |

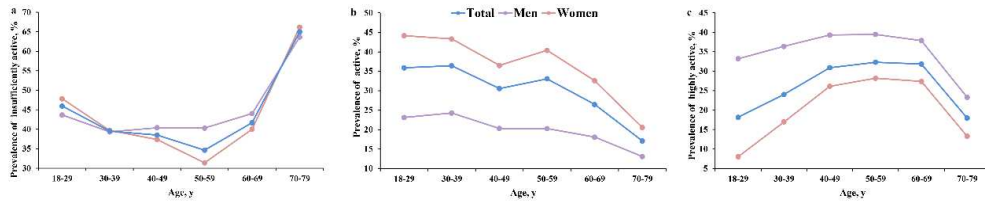

**Supplementary Figure 1.** Changes in the age-standardized prevalence of physical activity according to WHO with aging in different gender. (a) is for insufficiently active; (b) is for active; (c) is for highly active.

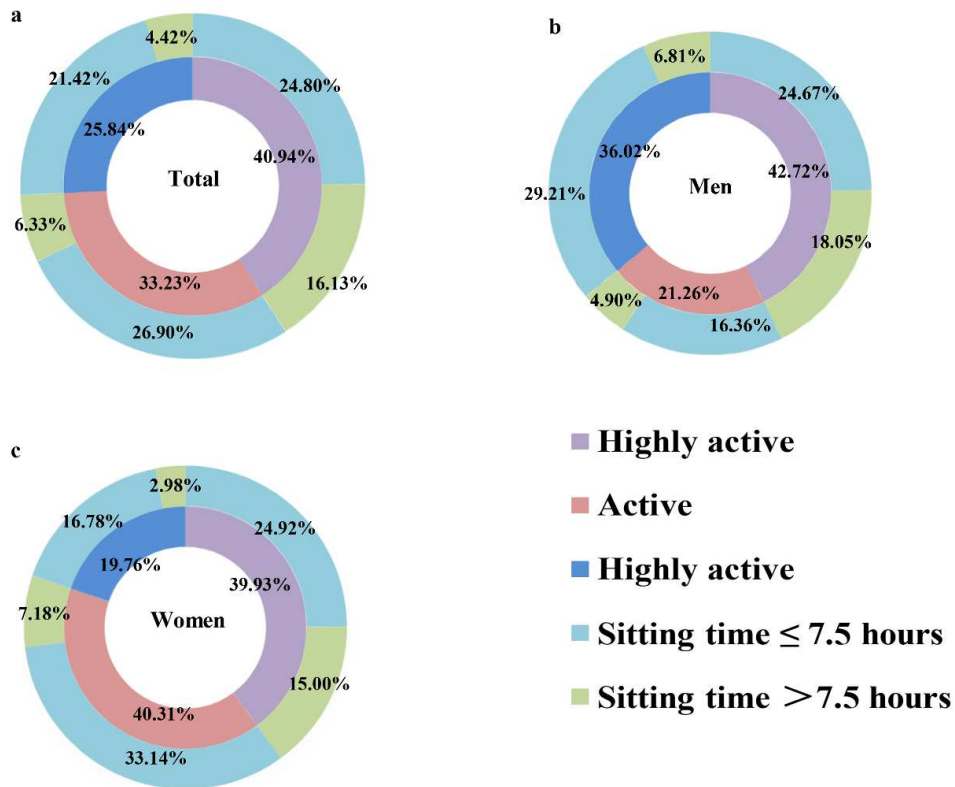

**Supplementary Figure 2.** The age-standardized percentage according to the cut-off points of physical activity from WHO and sitting time in different gender. (a) is for total; (b) is for men; (c) is for women.
